# Supplementary material for: QSAR‐Based Estimation of Species Sensitivity Distribution Parameters: An Exploratory Investigation
Source: Environ Toxicol Chem. 2019 Nov 9;38(12):2764–70. doi: 10.1002/etc.4601 (PMC6900027; doi:10.1002/etc.4601)
Supplement: Supplementary file 2 — Supplementary Material [file ETC-38-2764-s002.xlsx]

## Sheet: subsetSSD
CAS	CAS.	Substance	Number of species per SSD	Molecular Weight (-)	10Log Vapour Pressure (mmHg 25)	10Log Kow (-)	10Log-Solubility (mg/L)	10LogEffectiveConcentration (ug/L) μ	10LogSsdSlope (ug/L) σ	QualityScore	Quality	Endpoint	Functional group	Biodegradation rate	z-transformed Solubility	z-transformed Kow	z-transformed vapour pressure	z-transformed molecular weight	Predicted μ	Predicted σ
100-66-3	100663	anisole	13	108.14	2.65375	2.07	3.52158	4.27	0.75	1221	Moderate	EC50	Neutral_Organics	days	0.386349	-0.016639	1.17444	-0.904659	4.77341	0.710593
10007-85-9	10007859	3,6-Dichloro-2-methoxybenzoic acid, Potassium salt	5	259.13	-10.3605	-0.9	5.09096	5.41	0.92	1221	Moderate	EC50	Neutral_Organics	days_weeks	1.00705	-0.973948	-0.899957	0.229643	4.61004	0.684744
100784-20-1	100784201	Halosulfuron	12	434.81	-11.5607	-0.02	1.17609	4.98	0.27	1211	Moderate	EC50	Esters	days_weeks	-0.541317	-0.690301	-1.09125	1.54943	2.34268	1.16597
101-21-3	101213	Chlorpropham	14	213.66	-3.74473	3.51	1.94939	3.68	0.17	1211	Moderate	EC50	Esters	days_weeks	-0.235469	0.447511	0.154559	-0.111947	2.7996	0.949244
101-84-8	101848	diphenyl ether	24	170.21	0.355279	4.05	1.58063	3.29	0.47	1211	Moderate	EC50	Neutral_Organics	days_weeks	-0.381318	0.621567	0.808074	-0.438362	3.91724	0.67364
103-23-1	103231	bis(2-ethylhexyl) adipate	10	370.57	-3.37002	8.12	-1.82725	3.5	1.35	1225	Moderate	EC50	Esters	hours_days	-1.72917	1.93343	0.214285	1.06683	2.15337	0.982029
103-69-5	103695	N-Ethylaniline	13	121.18	1.61619	2.11	3.168	4.39	0.65	1211	Moderate	EC50	Neutral_Organics	days_weeks	0.246502	-0.00374595	1.00906	-0.806697	4.42983	0.635774
103-90-2	103902	paracetamol	38	151.17	-3.58737	0.27	3.90612	5.22	0.81	1211	Moderate	EC50	Phenols	days	0.538439	-0.596826	0.179641	-0.581399	4.06774	0.684583
10311-84-9	10311849	Dialifos	2	393.85	-7.20761	4.69	-0.744727	1.04	1.38	1221	Moderate	EC50	Esters	days_weeks	-1.30102	0.827856	-0.397403	1.24172	1.90027	1.09617
103112-35-2	103112352	fenchlorazool-ethyl	7	403.48	-8.17522	4.52	-0.0457575	2.71	0.41	1211	Moderate	EC50	Esters	weeks_months	-1.02457	0.77306	-0.551635	1.31406	1.40602	1.23041
104-43-8	104438	4-Dodecylphenol	2	262.44	-5.63827	7.91	-1.87063	2.16	0.84	1221	Moderate	EC50	Phenols	days_weeks	-1.74633	1.86575	-0.147261	0.254509	2.07497	0.686939
104-76-7	104767	2-Ethylhexanol	14	144.26	0.769269	3.22	2.14749	4.42	0.18	1211	Moderate	EC50	Neutral_Organics	days	-0.157119	0.354036	0.874062	-0.63331	4.30712	0.766515
104-90-5	104905	5-Ethyl-2-methylpyridine	8	121.18	2.14602	2.39	4.91913	4.77	0.75	1221	Moderate	EC50	Neutral_Organics	days_weeks	0.939093	0.0865054	1.09351	-0.806697	4.95057	0.511846
105-53-3	105533	diethyl malonate	11	160.17	1.68234	0.9	4.61062	5.02	0.75	1221	Moderate	EC50	Esters	days	0.817073	-0.393761	1.0196	-0.513787	3.97096	0.946569
105-58-8	105588	Diethyl carbonate	5	118.13	3.20401	1.22	4.62541	5.09	0.75	1221	Moderate	EC50	Esters	days_weeks	0.822922	-0.290616	1.26214	-0.829609	3.81612	0.824854
105-75-9	105759	dibutyl fumarate	13	228.29	-0.149258	4.16	2.12733	2.67	0.37	1211	Moderate	EC50	Esters	hours_days	-0.165092	0.657023	0.727654	-0.00204007	3.42711	0.855999
10552-74-6	10552746	nitrothal-isopropyl	4	295.29	-4.41005	3.3	0.431364	3.2	0.84	1221	Moderate	EC50	Esters	days	-0.835864	0.379822	0.0485104	0.501293	2.54827	1.15788
106-41-2	106412	4-Bromophenol	2	173.01	-1.93181	2.59	4.14613	4.61	0.84	1221	Moderate	EC50	Phenols	days_weeks	0.633363	0.150971	0.443526	-0.417327	3.96879	0.476227
108-01-0	108010	Dimethylethanolamine	7	89.139	2.6407	-0.94	6	5.05	0.75	1221	Moderate	EC50	Aliphatic_Amines	days_weeks	1.36659	-0.986841	1.17236	-1.0474	5.00105	0.545766
108-05-4	108054	Vinyl acetate	14	86.09	4.20038	0.73	4.44705	4.61	0.56	1211	Moderate	EC50	Esters	days	0.75238	-0.448556	1.42096	-1.07031	4.00793	0.94976
108-10-1	108101	4-Methyl-2-pentanone	14	100.16	3.46329	1.16	4.00758	6.02	0.4	1211	Moderate	EC50	Neutral_Organics	days_weeks	0.578565	-0.309956	1.30347	-0.964608	4.73934	0.606797
108-31-6	108316	Maleic anhydride	28	98.057	1.34494	1.62	4.98495	5.06	0.75	1221	Moderate	EC50	Neutral_Organics	days_weeks	0.965127	-0.161686	0.96582	-0.980406	4.94835	0.539477
108-70-3	108703	1,3,5-Trichlorobenzene	2	181.45	-0.339135	4.19	1.47712	3.62	0.7	1221	Moderate	EC50	Neutral_Organics	weeks	-0.422257	0.666693	0.697389	-0.353922	3.46014	0.768126
110-58-7	110587	1-Pentanamine	2	87.17	1.47712	1.49	6	4.87	0.7	1221	Moderate	EC50	Aliphatic_Amines	days	1.36659	-0.203588	0.986889	-1.06219	5.15339	0.566143
110-83-8	110838	Cyclohexene	10	82.146	4.05983	2.96	2.40981	3.9	0.74	1211	Moderate	EC50	Neutral_Organics	days_weeks	-0.0533667	0.270231	1.39856	-1.09994	4.28593	0.640544
11096-82-5	11096825	Aroclor 1260	9	395.33	-6.88606	7.55	-1.84164	3.33	1.02	1211	Moderate	EC50	Neutral_Organics	months	-1.73486	1.74971	-0.34615	1.25284	2.52135	0.71052
111-15-9	111159	2-Ethoxyethanol, Acetate	10	132.16	0.369216	0.59	5.3927	4.9	0.38	1211	Moderate	EC50	Esters	days	1.12639	-0.493682	0.810296	-0.72421	4.15537	0.914978
111-26-2	111262	1-Hexanamine	2	101.19	0.95376	2.06	4.07918	4.69	0.7	1221	Moderate	EC50	Aliphatic_Amines	days	0.606885	-0.0198623	0.903469	-0.95687	4.57817	0.670353
111-40-0	111400	Diethylene triamine	33	103.17	1.52966	-2.13	6	5.46	0.67	1211	Moderate	EC50	Aliphatic_Amines	days	1.36659	-1.37041	0.995264	-0.941995	5.17956	0.695544
111-68-2	111682	1-Heptanamine	8	115.22	0.437751	2.57	3.83193	4.46	0.7	1221	Moderate	EC50	Aliphatic_Amines	days	0.509096	0.144524	0.82122	-0.851471	4.48639	0.670492
111-76-2	111762	2-Butoxyethanol	32	118.18	1.80152	0.57	4.8484	6.1	0.25	1211	Moderate	EC50	Neutral_Organics	days	0.911121	-0.500128	1.0386	-0.829234	5.1382	0.684638
112-00-5	112005	N,N,N-Trimethyl-1-dodecanaminium, Chloride	6	263.9	-8.03292	1.22	3.25406	2.69	0.78	1211	Moderate	EC50	Neutral_Organics	days_weeks	0.280543	-0.290616	-0.528953	0.265478	4.14255	0.713072
112-05-0	112050	Nonanoic acid	17	158.24	0.455244	3.52	2.61568	4.81	0.47	1211	Moderate	EC50	Neutral_Organics	hours_days	0.0280537	0.450734	0.824008	-0.528286	4.68473	0.586716
112-20-9	112209	1-Nonanamine	2	143.27	-0.555955	3.29	3.10721	3.7	0.7	1221	Moderate	EC50	Aliphatic_Amines	days	0.22246	0.376599	0.662829	-0.640747	4.2397	0.69592
112-53-8	112538	1-Dodecanol	19	186.34	-0.617491	4.77	0.762468	3.02	0.61	1211	Moderate	EC50	Neutral_Organics	days	-0.704909	0.853642	0.653021	-0.317187	3.85139	0.806177
112-65-2	112652	Dodecylguanidine HCL	6	227.4	-4.76955	4.24	2.79934	4.07	1.38	1211	Moderate	EC50	Aliphatic_Amines	days	0.100695	0.682809	-0.00879183	-0.00872614	4.00556	0.703639
112143-82-5	112143825	[[1-[(Dimethylamino)carbonyl]-3-(1,1-dimethylethyl)-1H-1,2,4-triazol-5-yl]thio]acetic acid ethyl ester	8	314.41	-6.92082	2.69	2.63649	3.34	1.39	1211	Moderate	EC50	Esters	days_weeks	0.0362848	0.183203	-0.351691	0.64493	2.89864	0.95177
115-31-1	115311	Exo-1,7,7-Trimethylbicyclo[2.2.1]hept-2-yl ester thiocyanato acetic acid	8	253.36	-4.60206	3.75	1.15259	2.71	0.57	1211	Moderate	EC50	Esters	days_weeks	-0.55061	0.524869	0.0179052	0.186297	2.53986	0.995721
116-29-0	116290	Tetradifon	8	356.05	-9.61979	4.61	-1.10791	3.17	0.81	1211	Moderate	EC50	Neutral_Organics	weeks_months	-1.44466	0.80207	-0.78189	0.957748	2.14388	1.04416
119-06-2	119062	1,2-Benzenedicarboxylic acid, Ditridecyl ester	6	530.84	-10.6003	13.45	-8.82974	2.35	0.35	1211	Moderate	EC50	Esters	days	-4.49873	3.65143	-0.938181	2.27085	-0.395967	1.41451
119-33-5	119335	2-Nitro-p-cresol	4	153.14	-1.10791	2.37	2.8014	4.44	0.84	1221	Moderate	EC50	Phenols	days_weeks	0.101511	0.0800589	0.574852	-0.566599	3.60951	0.565083
119-65-3	119653	Isoquinoline	6	129.16	0.688311	2.14	3.31018	4.27	0.24	1211	Moderate	EC50	Neutral_Organics	days_weeks	0.302738	0.00592383	0.861158	-0.746747	4.44005	0.63057
120-18-3	120183	2-Naphthalenesulfonic acid	9	208.24	-4.9978	0.01	3.42651	5.28	0.69	1211	Moderate	EC50	Neutral_Organics	days_weeks	0.348747	-0.680631	-0.0451732	-0.152664	4.30053	0.729473
120-78-5	120785	2.2’-Dithiobisbenzothiazole	10	332.49	-7.08208	4.66	-2.6968	4.5	0.75	1221	Moderate	EC50	Neutral_Organics	days_weeks	-2.07309	0.818186	-0.377394	0.780755	2.43398	0.962393
120-94-5	120945	1-Methylpyrrolidine	9	85.15	2	0.92	5.32858	5.8	1.31	1211	Moderate	EC50	Aliphatic_Amines	days_weeks	1.10104	-0.387314	1.07023	-1.07737	4.77368	0.525113
121-54-0	121540	N,N-Dimethyl-N-[2-[2-[4-(1,1,3,3-tetramethylbutyl)phenoxy]ethoxy]ethyl]benzenemethanaminium, Chloride	7	448.09	-13.4191	4	-0.228192	3.9	0.4	1211	Moderate	EC50	Neutral_Organics	weeks	-1.09673	0.605451	-1.38747	1.64919	2.53826	0.952096
12124-97-9	12124979	Ammonium bromide ((NH4)Br)	26	97.94	-13.9508	-4.37	5.88309	3.27	2.35	1211	Moderate	EC50	Inorganic_Compound	days_weeks	1.32035	-2.09242	-1.47222	-0.981285	4.33465	0.78147
123-03-5	123035	1-Hexadecylpyridinium, Chloride	8	340	-5.46218	1.71	2.39199	2.58	0.85	1211	Moderate	EC50	Neutral_Organics	days_weeks	-0.0604154	-0.132676	-0.119193	0.837174	3.97531	0.73666
123-86-4	123864	n-butyl acetate	26	116.16	3.20038	1.85	3.6018	5.01	0.45	1211	Moderate	EC50	Esters	days	0.418075	-0.0875508	1.26157	-0.844409	3.72357	0.96854
124-48-1	124481	Dibromochloromethane	2	208.28	1.19312	2.16	3.43136	4.67	0.7	1221	Moderate	EC50	Neutral_Organics	days_weeks	0.350666	0.0123704	0.941622	-0.152364	4.49152	0.619504
124-65-2	124652	Dimethyl arsinic acid, Sodium salt	11	159.98	-7.5391	-2.18	6.30103	4.77	0.3	1211	Moderate	EC50	Neutral_Organics	days_weeks	1.48565	-1.38653	-0.450241	-0.515214	5.06078	0.638945
125401-92-5	125401925	2,6-Bis[(4,6-dimethoxy-2-pyrimidinyl)oxy]benzoic acid sodium salt	9	452.36	-18.3546	-1.03	2.72795	4.44	1.2	1211	Moderate	EC50	Neutral_Organics	days_weeks	0.0724581	-1.01585	-2.17416	1.68127	3.66569	0.881477
126535-15-7	126535157	Trisulfuron methyl	12	492.43	-12.6778	3.56	-0.136796	2.09	0.43	1223	Moderate	EC50	Esters	weeks	-1.06058	0.463627	-1.26931	1.98229	1.49954	1.21619
12672-29-6	12672296	Aroclor 1248	12	291.99	-3.30627	6.2	-1	2.91	0.98	1211	Moderate	EC50	Neutral_Organics	weeks	-1.40198	1.31457	0.224446	0.476502	2.63415	0.868933
127-07-1	127071	Hydroxyurea	3	76.057	-3.53018	-1.8	6	5.75	0.7	1221	Moderate	EC50	Neutral_Organics	days_weeks	1.36659	-1.26404	0.188757	-1.14568	5.10353	0.623294
127-91-3	127913	pin-2(10)-ene	3	136.24	2.5245	4.35	1.2467	2.9	0.7	1221	Moderate	EC50	Neutral_Organics	days_weeks	-0.513392	0.718265	1.15384	-0.693559	3.89039	0.672643
129-67-9	129679	7-Oxobicyclo[2.2.1]heptane-2,3-dicarboxylic acid, Disodium salt	14	230.13	-8.97881	0.23	4.28443	4.89	0.74	1211	Moderate	EC50	Neutral_Organics	hours_days	0.688063	-0.609719	-0.679722	0.0117828	4.87732	0.648438
129630-19-9	129630199	2-[2-Chloro-5-[4-chloro-5-(difluoromethoxy)-1-methyl-1H-pyrazol-3-yl]-4-fluorophenoxy]acetic acid ethyl ester	15	413.18	-4.44491	3.49	0	1.85	1.61	1211	Moderate	EC50	Esters	days_weeks	-1.00647	0.441064	0.0429547	1.38693	2.21429	1.07733
132-27-4	132274	[1,1'-Biphenyl]-2-ol, Sodium salt	4	192.19	-10.719	0.59	6	3.79	0.8	1221	Moderate	EC50	Phenols	days_weeks	1.36659	-0.493682	-0.957092	-0.273239	4.2274	0.476582
1338-24-5	1338245	Naphthenic acid	24	128.17	-1.31876	2.36	3.35334	3.96	0.35	1211	Moderate	EC50	Neutral_Organics	days	0.319807	0.0768356	0.541243	-0.754185	4.59196	0.731825
135590-91-9	135590919	1-(2,4-Dichlorophenyl)-4,5-dihydro-5-methyl-1H-pyrazole-3,5-dicarboxylic acid 3,5-diethyl ester	14	373.24	-3.35534	4.82	0.379215	3.84	0.44	1222	Moderate	EC50	Esters	days_weeks	-0.85649	0.869758	0.216624	1.08689	2.35063	0.999886
13674-87-8	13674878	1,3-Dichloro-2-propanol phosphate (3:1)	48	430.91	-4.4188	3.65	0.278662	3.65	0.44	1211	Moderate	EC50	Esters	weeks	-0.896259	0.492636	0.0471151	1.52013	1.89106	1.14306
138-86-3	138863	Limnonene	28	136.24	0.158362	4.38	1.13988	4.49	0.81	1211	Moderate	EC50	Neutral_Organics	days_weeks	-0.555639	0.727935	0.776687	-0.693559	3.78137	0.690821
139-13-9	139139	Nitrilotriacetic acid	12	191.14	-6.02026	-3.81	4.44404	5.35	0.38	1211	Moderate	EC50	Aliphatic_Amines	hours_days	0.751192	-1.91192	-0.208147	-0.281127	4.74806	0.753252
140-57-8	140578	Sulfurous acid 2-Chloroethyl 2-[4-(1,1-dimethylethyl)phenoxy]-1-methylethyl ester	11	334.86	-5.41117	4.82	-0.229001	2.6	0.88	1211	Moderate	EC50	Neutral_Organics	weeks	-1.09705	0.869758	-0.111062	0.79856	2.79649	0.880549
1401-55-4	1401554	Tannic acid	6	636.48	-28.0545	-0.19	2.70961	3.54	1.22	1211	Moderate	EC50	Esters	days	0.065205	-0.745096	-3.72027	3.06446	2.44956	1.26302
141112-29-0	141112290	(5-Cyclopropyl-4-isoxazolyl)[2-(methylsulfonyl)-4-(trifluoromethyl)phenyl]methanone	7	359.32	-8.12494	2.32	0.792392	3.27	1.17	1211	Moderate	EC50	Neutral_Organics	weeks	-0.693074	0.0639426	-0.54362	0.982314	3.01855	0.919611
142-96-1	142961	dibutyl ether	18	130.23	3.01076	3.01	2.62244	4.84	0.45	1211	Moderate	EC50	Neutral_Organics	days	0.0307295	0.286348	1.23134	-0.738709	4.51945	0.732085
1420-06-0	1420060	4-(Triphenylmethyl)morpholine	18	329.45	-7.55596	4.21	-1.69897	2.19	0.62	1211	Moderate	EC50	Aliphatic_Amines	weeks	-1.67843	0.673139	-0.452927	0.757917	2.00572	0.992792
143-07-7	143077	lauric acid	11	200.32	-0.725951	5	1.43846	4.37	0.57	1211	Moderate	EC50	Neutral_Organics	days	-0.437546	0.927777	0.635733	-0.212163	4.04127	0.75562
143-08-8	143088	1-Nonanol	10	144.26	0.640704	3.3	2.08948	4.04	0.33	1211	Moderate	EC50	Neutral_Organics	days	-0.180062	0.379822	0.853569	-0.63331	4.28561	0.768008
1445-75-6	1445756	Diisopropylmethyl phosphonate (dimp)	8	180.19	-0.55752	1.03	3.17609	5.75	0.36	1211	Moderate	EC50	Esters	days_weeks	0.249703	-0.351858	0.66258	-0.363388	3.2753	0.943448
147150-35-4	147150354	3-Chloro-2-[[(5-ethoxy-7-fluoro[1,2,4]triazolo[1,5-c]pyrimidin-2-yl)sulfonyl]amino]benzoic acid, Methyl ester	9	429.81	-10.7825	2.7	1.20412	4.63	1.49	1211	Moderate	EC50	Esters	days_weeks	-0.530231	0.186427	-0.967221	1.51186	2.35806	1.06265
148477-71-8	148477718	2,2-Dimethylbutanoic acid, 3-(2,4-Dichlorophenyl)-2-oxo-1-oxaspiro[4.5]dec-3-en-4-yl ester	9	411.33	-9.10182	6.21	-1.8911	2.74	1.8	1222	Moderate	EC50	Esters	weeks	-1.75442	1.31779	-0.699329	1.37304	1.09346	1.21371
149-31-5	149315	2-Methyl-1,3-pentanediol	10	118.18	-1.42366	0.62	4.48058	6.88	0.32	1211	Moderate	EC50	Neutral_Organics	days	0.765643	-0.484012	0.524523	-0.829234	4.92543	0.723189
15165-67-0	15165670	Dichlorprop-P	18	235.07	-6.33255	-0.25	2.77085	5.42	0.38	1211	Moderate	EC50	Neutral_Organics	days_weeks	0.0894272	-0.764436	-0.257924	0.0488942	4.06914	0.787425
152-16-9	152169	Octamethylphosphoramide	2	286.25	-3	-1.01	6	5.23	1.01	1221	Moderate	EC50	Esters	days_weeks	1.36659	-1.0094	0.273264	0.43338	4.02319	0.850236
156-87-6	156876	Aminopropanol	7	75.112	1.31795	-1.12	6	5.25	0.75	1221	Moderate	EC50	Aliphatic_Amines	days	1.36659	-1.04486	0.961519	-1.15278	5.16576	0.660479
15627-09-5	15627095	Bis[N-(hydroxy-kappaO)-N-(nitroso-kappaO)cyclohexanaminato]copper	6	144.17	-4.65365	1.04	4.0162	2.45	0.4	1211	Moderate	EC50	Aliphatic_Amines	days_weeks	0.581974	-0.348635	0.00968256	-0.633986	4.17491	0.639164
15922-78-8	15922788	1-Hydroxy-2(1H)pyridinethione, Sodium salt	24	149.14	-9.91009	-2.72	6	1.9	1.45	1211	Moderate	EC50	Neutral_Organics	days_weeks	1.36659	-1.56058	-0.828163	-0.596649	4.89941	0.68989
1593-77-7	1593777	Dodemorf	7	281.49	-5.4437	5.7	0.333649	3.62	0.8	1211	Moderate	EC50	Aliphatic_Amines	weeks	-0.874512	1.15341	-0.116247	0.397621	2.65167	0.799315
163520-33-0	163520330	AE F 122006	8	295.34	-6.29328	5.66	-0.717378	3.05	0.48	1222	Moderate	EC50	Aliphatic_Amines	days_weeks	-1.2902	1.14051	-0.251665	0.501668	2.72413	0.78264
16484-77-8	16484778	mecoprop-p	11	214.65	-5.52288	3.2	2.9345	4.9	0.33	1211	Moderate	EC50	Neutral_Organics	days	0.154151	0.34759	-0.128868	-0.10451	4.32686	0.750475
165252-70-0	165252700	N''-Methyl-N-nitro-N'-[(tetrahydro-3-furanyl)methyl]guanidine	12	202.21	-3.64397	-0.64	5.17638	4.4	1.32	1211	Moderate	EC50	Aliphatic_Amines	days_weeks	1.04084	-0.890143	0.170618	-0.197964	4.55423	0.620413
16672-87-0	16672870	Ethephon	25	144.49	-7.00877	-0.22	6	5.27	0.33	1211	Moderate	EC50	Neutral_Organics	days_weeks	1.36659	-0.754766	-0.36571	-0.631582	4.97819	0.585036
1678-91-7	1678917	Ethylcyclohexane	2	112.22	1.10721	4.56	0.799341	3.72	0.7	1221	Moderate	EC50	Neutral_Organics	days_weeks	-0.690326	0.785953	0.927928	-0.874008	3.7132	0.700976
1689-83-4	1689834	Ioxynil	8	370.91	-6.86012	3.43	1.69897	3.8	0.18	1211	Moderate	EC50	Phenols	weeks	-0.334513	0.421725	-0.342016	1.06938	2.69129	0.716659
17439-94-0	17439940	7-Oxabicyclo(2.2.1)heptane-2,3-dicarboxylic acid, Diammonium salt	10	186.17	-9.8041	1.91	5	5.02	0.5	1211	Moderate	EC50	Neutral_Organics	hours_days	0.971078	-0.0682112	-0.811268	-0.318464	5.0452	0.547207
1757-18-2	1757182	Akton	7	375.64	-5.31426	5.91	-1.41184	1.42	1.56	1211	Moderate	EC50	Esters	days_weeks	-1.56487	1.22109	-0.0956148	1.10492	1.76201	1.0848
18181-80-1	18181801	Bromopropylate	9	428.13	-7.08619	5.4	-1	3.16	0.6	1211	Moderate	EC50	Esters	weeks	-1.40198	1.05671	-0.378049	1.49924	1.42244	1.17556
18496-25-8	18496258	Sulfide	6	34.08	-8.41908	-1.38	6	3.41	0.62	1211	Moderate	EC50	Inorganic_Compound	days	1.36659	-1.12866	-0.590503	-1.46103	4.73767	0.739067
1928-43-4	1928434	2-(2,4-Dichlorophenoxy)acetic acid, 2-Ethylhexyl ester	29	333.26	-5.34008	5.78	-1.04345	3.1	1.3	1211	Moderate	EC50	Esters	days_weeks	-1.41917	1.17919	-0.0997312	0.78654	1.86831	1.06622
19398-13-1	19398131	2-(2,4,5-Trichlorophenoxy)propanoic acid, 2-Butoxyethyl ester	8	369.68	-5.98716	5.16	-0.737786	3.67	0.99	1211	Moderate	EC50	Esters	days_weeks	-1.29828	0.979349	-0.202872	1.06014	1.93934	1.07245
1948-33-0	1948330	2-tert-butylhydroquinone	13	166.22	-1.78175	2.94	3.01106	2.57	0.45	1211	Moderate	EC50	Phenols	days_weeks	0.184433	0.263785	0.467446	-0.468337	3.64393	0.534914
2008-46-0	2008460	(2,4,5-Trichlorophenoxy)acetic acid, Compd. with N,N-Diethylethanamine (1:1)	4	255.49	-4.42597	3.31	2.44404	4.64	0.84	1221	Moderate	EC50	Neutral_Organics	days_weeks	-0.0398284	0.383046	0.0459731	0.202298	4.01368	0.670578
2016-57-1	2016571	1-Decanamine	6	157.3	-1	3.78	2.74036	3.29	0.7	1221	Moderate	EC50	Aliphatic_Amines	days	0.0773683	0.534539	0.592051	-0.535348	4.11592	0.703984
20679-58-7	20679587	2-Butene-1,4-diyl ester, Bromoacetic acid	16	329.97	-2.83268	1.86	2.32469	2.07	0.43	1211	Moderate	EC50	Esters	days	-0.0870329	-0.0843275	0.299933	0.761824	3.15618	1.08102
20762-60-1	20762601	Potassium azide	8	81.12	-21.7496	0.16	4.54332	3.65	0.42	1211	Moderate	EC50	Inorganic_Compound	days	0.790458	-0.632282	-2.7153	-1.10764	3.86757	0.846609
208465-21-8	208465218	Mesosulfuron-methyl	10	503.51	-15.7721	0.8	2.15076	4.55	0.93	1211	Moderate	EC50	Esters	days_weeks	-0.155827	-0.425993	-1.76253	2.06553	2.47947	1.09696
22204-53-1	22204531	Naproxen	10	230.26	-5.8962	3.18	1.2014	4.33	1.12	1211	Moderate	EC50	Neutral_Organics	days	-0.531308	0.341143	-0.188372	0.0127594	3.81472	0.86312
2275-23-2	2275232	vamidothion	3	287.34	-5.86328	0.06	6	4.74	1.38	1221	Moderate	EC50	Esters	days	1.36659	-0.664515	-0.183125	0.441569	4.12867	0.928294
2372-82-9	2372829	N-(3-aminopropyl)-N-dodecylpropane-1,3-diamine	10	299.55	-3.70198	4.46	2.38182	2.27	0.84	1211	Moderate	EC50	Aliphatic_Amines	days_weeks	-0.0644395	0.753721	0.161372	0.533296	3.71171	0.615329
2446-69-7	2446697	4-Hexylphenol	2	178.28	-3.14086	4.52	1.4729	2.62	0.84	1221	Moderate	EC50	Phenols	days	-0.423925	0.77306	0.250811	-0.377737	3.35184	0.684363
24938-91-8	24938918	Tridecyl mono-octyl ether	3	420.64	-10.5638	3.89	0.546543	3.5	0.7	1221	Moderate	EC50	Neutral_Organics	days_weeks	-0.79031	0.569995	-0.932365	1.44298	3.26003	0.802555
25167-81-1	25167811	Dichlorophenol	2	163	-1.04576	3.06	3.65321	3.57	0.84	1221	Moderate	EC50	Phenols	days_weeks	0.43841	0.302464	0.584758	-0.492527	3.85263	0.485992
25322-68-3	25322683	.alpha.-Hydro-.omega.-hydroxypoly(oxy-1,2-ethanediyl)	9	238.28	-6.52433	-2.3	6	6.48	0.79	1211	Moderate	EC50	Neutral_Organics	days_weeks	1.36659	-1.4252	-0.288493	0.0730091	5.0082	0.656993
25322-69-4	25322694	Polypropylene glycol	15	308.42	-5.02208	-0.21	2.97653	6.68	0.74	1211	Moderate	EC50	Neutral_Organics	days_weeks	0.170774	-0.751543	-0.0490434	0.599931	4.17141	0.766032
2536-31-4	2536314	2-Chloro-9-hydroxy-9H-fluorene-9-carboxylic acid, Methyl ester	8	274.71	-7.62709	2.86	1.25527	3.25	0.92	1221	Moderate	EC50	Esters	days_weeks	-0.51	0.237999	-0.464266	0.346687	2.47576	1.03704
25954-13-6	25954136	Fosamine ammonium	10	170.11	-5.40012	-5.98	6	5.43	0.39	1211	Moderate	EC50	Esters	days_weeks	1.36659	-2.61137	-0.1093	-0.439113	3.97761	1.04093
26225-79-6	26225796	Ethofumesate	32	286.35	-5.3098	2.7	1.69897	4.35	0.71	1211	Moderate	EC50	Esters	days_weeks	-0.334513	0.186427	-0.0949048	0.434132	2.68123	1.0024
26952-21-6	26952216	Isooctanol	3	130.23	-0.463442	2.73	2.80618	4.55	0.7	1221	Moderate	EC50	Neutral_Organics	days	0.1034	0.196096	0.677575	-0.738709	4.45981	0.748776
2702-72-9	2702729	(2,4-Dichlorophenoxy)acetic acid, Sodium salt	10	243.02	-10.3605	-1.19	5.52504	5.24	1	1211	Moderate	EC50	Neutral_Organics	days_weeks	1.17874	-1.06742	-0.899957	0.108618	4.73722	0.667591
271-89-6	271896	2,3-Benzofuran	3	118.14	-0.356547	2.67	2.72819	4.2	0.7	1221	Moderate	EC50	Neutral_Organics	days_weeks	0.0725545	0.176757	0.694614	-0.829534	4.23413	0.654019
283594-90-1	283594901	3,3-Dimethylbutanoic acid 2-oxo-3-(2,4,6-trimethylphenyl)-1-oaxspiro[4.4]non-3-en-4-yl ester	13	370.49	-8.58503	6.08	-1.52129	2	1.13	1211	Moderate	EC50	Esters	days_weeks	-1.60816	1.27589	-0.616955	1.06623	1.62146	1.1029
29450-45-1	29450451	2-(4-Chloro-2-methylphenoxy)acetic acid, 2-Ethylhexyl ester	7	312.84	-5.07417	6.17	-1.25579	2.97	0.58	1211	Moderate	EC50	Esters	days_weeks	-1.50315	1.3049	-0.0573466	0.633136	1.81319	1.06432
299-85-4	299854	Zytron	3	314.17	-4.2636	4.3	0.69897	1.5	1.01	1221	Moderate	EC50	Esters	weeks	-0.730023	0.702149	0.0718531	0.643127	2.01304	1.09229
299-86-5	299865	Crufomaat	14	291.72	-4.42597	3.42	2.30103	4.26	0.7	1211	Moderate	EC50	Esters	weeks	-0.0963922	0.418501	0.0459731	0.474473	2.47579	1.02302
302-79-4	302794	tretinoin	2	300.44	-6.9914	6.3	-0.898597	1.89	0.7	1221	Moderate	EC50	Neutral_Organics	days_weeks	-1.36188	1.3468	-0.362941	0.539982	2.94464	0.789075
311-45-5	311455	Diethyl-4-nitrophenyl ester phosphoric acid	9	275.2	-5.95861	1.98	3.5611	0.75	0.67	1211	Moderate	EC50	Esters	days	0.401979	-0.0456484	-0.19832	0.350368	3.409	1.01476
318-98-9	318989	1-[(1-Methylethyl)amino]-3-(1-naphthalenyloxy)-2-propanol hydrochloride (1:1)	19	295.81	-12.5003	0.74	3.47842	3.35	1.26	1211	Moderate	EC50	Neutral_Organics	days_weeks	0.369278	-0.445333	-1.24103	0.505199	4.06324	0.739588
31895-22-4	31895224	N,N-Dimethyl-1,2,3-trithian-5-amine ethanedioate (1:1)	8	271.37	-10.8761	-1.04	5.53542	2.41	0.99	1211	Moderate	EC50	Neutral_Organics	days	1.18284	-1.01907	-0.982146	0.321595	4.92931	0.765569
319-84-6	319846	(1 alpha,2 alpha,3 beta,4 alpha,5 beta,6 beta)1,2,3,4,5,6-Hexachlorocyclohexane	12	290.83	-4.45346	4.14	0.90309	3.14	0.43	1211	Moderate	EC50	Neutral_Organics	weeks	-0.649292	0.650576	0.0415916	0.467787	3.15924	0.828031
3244-90-4	3244904	Thiodiphosphoric acid, Tetrapropyl ester	16	378.42	-4.97062	5.94	1.47712	1.69	1.3	1211	Moderate	EC50	Esters	days	-0.422257	1.23076	-0.0408404	1.1258	2.81365	0.999913
327-98-0	327980	Ethylphosphonothioic acid, O-Ethyl O-(2,4,5-trichlorophenyl)ester	9	333.6	-4.82391	5.23	-0.229148	1.76	1.18	1211	Moderate	EC50	Esters	weeks	-1.0971	1.00191	-0.0174561	0.789094	1.72055	1.12081
333-18-6	333186	Ethylenediamine dihydrochloride	8	131.01	-9.13018	-3.39	6	4.68	0.56	1211	Moderate	EC50	Neutral_Organics	days_weeks	1.36659	-1.77654	-0.703849	-0.732849	4.92965	0.709779
333-20-0	333200	Thiocyanic acid, Potassium salt	16	97.18	-7.45469	-2.52	6	4.57	0.94	1211	Moderate	EC50	Neutral_Organics	days	1.36659	-1.49612	-0.436787	-0.986995	5.18612	0.77107
35575-96-3	35575963	azamethifos	12	324.68	-7.43533	1.05	3.04139	3.06	1.23	1211	Moderate	EC50	Esters	days	0.196429	-0.345412	-0.433701	0.722083	3.21667	1.08883
36335-67-8	36335678	O-Ethyl-O-(3-methyl-6-nitrophenyl-N-sec-(1-Methylpropyl)phospheramidothioic acid, O-(5-Methyl-2-nitrophenyl)O-propyl est	3	332.36	-3.20066	4.62	0.791691	3.47	1.01	1221	Moderate	EC50	Esters	weeks	-0.693351	0.805293	0.24128	0.779779	2.07267	1.06934
3739-38-6	3739386	3-Phenoxybenzoic acid	8	214.22	-5.50031	3.91	1.22814	4.35	1.14	1211	Moderate	EC50	Neutral_Organics	days_weeks	-0.52073	0.576441	-0.125271	-0.10774	3.62345	0.731894
38260-54-7	38260547	O-(6-Ethoxy-2-ethyl-4-pyrimidinyl)O,O-dimetyl ester, Phosphorothioic acid	11	292.29	-4.09691	2.94	1.60206	2.92	1.31	1211	Moderate	EC50	Esters	days	-0.372842	0.263785	0.098423	0.478755	2.89875	1.09485
3844-45-9	3844459	N-Ethyl-N-[4[[4-[ethyl[(3-sulfophenyl)methyl]amino]phenyl](2-sulfophenyl)methylene]-2,5-cyclohexadien-1-ylidene]-3-sulfo	8	793.86	-41.5272	-4.94	3.13799	5.37	0.27	1211	Moderate	EC50	Neutral_Organics	weeks_months	0.234633	-2.27615	-5.86774	4.24677	2.38129	1.28511
39300-45-3	39300453	2-Butenoic acid, 2(or 4)-isooctyl-4,6(or 2,6)-dinitrophenyl ester	16	364.4	-7.39794	5.98	0.60206	1.72	0.7	1211	Moderate	EC50	Esters	days_weeks	-0.768352	1.24366	-0.427741	1.02048	2.27381	0.965508
4180-23-8	4180238	(E)-anethole	13	148.21	0.926919	3.39	2.1494	3.85	0.13	1211	Moderate	EC50	Neutral_Organics	days_weeks	-0.156362	0.408832	0.89919	-0.603636	4.10462	0.658182
42576-02-3	42576023	bifenox	15	342.13	-7	4.48	-0.400117	3.36	1.23	1211	Moderate	EC50	Esters	weeks	-1.16472	0.760167	-0.364312	0.853175	1.60455	1.17
464-49-3	464493	(1R,4R)-1,7,7-Trimethylbicyclo[2.2.1]heptan-2-one	3	152.24	-1.14267	2.74	2	5.32	0.7	1221	Moderate	EC50	Neutral_Organics	days_weeks	-0.215453	0.19932	0.569311	-0.57336	3.99768	0.701858
485-31-4	485314	3-Methylcrotonic acid, 2-sec-Butyl-4,6-dinitrophenyl ester	10	322.32	-6.50031	4.49	0	2.8	1.46	1211	Moderate	EC50	Esters	days_weeks	-1.00647	0.763391	-0.284665	0.704354	2.13978	1.05235
4920-77-8	4920778	3-Methyl-2-nitrophenol	2	153.14	-1.42946	2.29	3.54531	4.47	0.84	1221	Moderate	EC50	Phenols	days_weeks	0.395732	0.0542728	0.523599	-0.566599	3.81405	0.522445
497-19-8	497198	Sodium carbonate	27	105.99	-16.0035	-6.19	6	5.82	0.29	1211	Moderate	EC50	Neutral_Organics	days	1.36659	-2.67905	-1.79941	-0.92081	4.92907	0.947615
50-21-5	50215	L-Lactic acid	11	90.078	0.581196	-0.65	5.88762	5.56	0.46	1211	Moderate	EC50	Neutral_Organics	days	1.32214	-0.893366	0.844084	-1.04035	5.406	0.668841
50-78-2	50782	Acetyl salicylic acid	17	180.16	-2.05827	1.13	3.36751	5.25	0.48	1211	Moderate	EC50	Esters	days	0.32541	-0.319626	0.42337	-0.363613	3.48747	1.03692
500-99-2	500992	3,5-Dimethoxyphenol	3	154.17	-2.03905	1.64	4.041	4.42	0.84	1221	Moderate	EC50	Phenols	days	0.591783	-0.155239	0.426433	-0.558861	4.14845	0.618785
50512-35-1	50512351	Isoprothiolan	9	290.39	-1.84466	2.88	1.73239	4.08	0.35	1211	Moderate	EC50	Esters	days	-0.321294	0.244445	0.457417	0.464482	3.011	1.07685
510-15-6	510156	4-Chloro-alpha-(4-chlorophenyl)-alpha-hydroxybenzeneacetic acid ethyl ester	13	325.19	-5.65758	4.74	1.11394	3.46	0.59	1211	Moderate	EC50	Esters	weeks	-0.565897	0.843972	-0.150338	0.725914	2.08382	1.05755
51200-87-4	51200874	4,4-Dimethyloxazolidine	10	101.15	0.879669	-0.08	6	4.84	0.44	1211	Moderate	EC50	Aliphatic_Amines	days_weeks	1.36659	-0.70964	0.891659	-0.957171	4.93718	0.524244
51276-47-2	51276472	Glufosinate	2	181.13	-9.9393	-4.49	6	3.76	1.01	1221	Moderate	EC50	Aliphatic_Amines	days	1.36659	-2.1311	-0.832818	-0.356326	4.81739	0.840558
513-81-5	513815	2,3-Dimethyl-1,3-butadiene	3	82.15	2.18184	3.13	2.51322	4.45	0.7	1221	Moderate	EC50	Neutral_Organics	days_weeks	-0.0124699	0.325027	1.09922	-1.09991	4.2527	0.637796
51384-51-1	51384511	1-[4-(2-Methoxyethyl)phenoxy]-3-[(1-methylethyl)amino]-2-propanol	7	267.37	-6.54061	1.88	4.22789	4.7	0.61	1211	Moderate	EC50	Aliphatic_Amines	days_weeks	0.665699	-0.077881	-0.291087	0.291546	4.1681	0.605592
51596-11-3	51596113	(6R,25R)-5-O-Demethyl-28-deoxy-6,28-epoxy-25-methylmilbemycin B,	10	542.72	-10.011	5.9	0.857332	1.2	0.94	1211	Moderate	EC50	Esters	weeks	-0.667389	1.21787	-0.844246	2.36009	1.85844	1.05523
526-75-0	526750	2,3-Dimethylphenol	2	122.17	-1.05061	2.48	3.65992	4.09	0.84	1221	Moderate	EC50	Phenols	days_weeks	0.441061	0.115515	0.583984	-0.799259	3.85832	0.50637
5292-45-5	5292455	Dimethyl nitroterephthalate	3	239.18	-1.60333	1.48	2.19576	3.73	0.72	1221	Moderate	EC50	Esters	days	-0.138027	-0.206811	0.495885	0.0797703	3.16208	1.09633
540-72-7	540727	Natriumthiocyanaat	19	81.07	-8.82681	-2.52	5.76343	5.05	0.93	1211	Moderate	EC50	Neutral_Organics	days	1.27302	-1.49612	-0.655494	-1.10802	5.07264	0.793314
54593-83-8	54593838	Chlorethoxyfos	13	336	-3.09963	4.59	0	-0.14	1.09	1211	Moderate	EC50	Esters	days_weeks	-1.00647	0.795623	0.257383	0.807124	2.25122	1.03084
54739-18-3	54739183	Fluvoxamin	6	318.34	-4.71897	3.09	1.34674	3.47	0.4	1211	Moderate	EC50	Aliphatic_Amines	weeks	-0.473822	0.312134	-0.000728985	0.674454	2.98544	0.824713
55-18-5	55185	N-Ethyl-N-nitrosoethanamine	5	102.14	-0.0655015	0.48	5.02531	5.2	0.68	1221	Moderate	EC50	Aliphatic_Amines	days_weeks	0.981087	-0.529138	0.741005	-0.949733	4.62106	0.571008
55512-33-9	55512339	pyridaat	13	378.92	-9.011	5.73	0.176091	3.77	1.03	1211	Moderate	EC50	Esters	days_weeks	-0.936827	1.16308	-0.684852	1.12956	2.09944	1.01
556-67-2	556672	Octamethylcyclotetrasiloxane	14	296.62	2.19671	6.79	0.118926	1.9	0.29	1224	Moderate	EC50	Neutral_Organics	days_weeks	-0.959437	1.50474	1.10159	0.511284	3.53777	0.658517
556-88-7	556887	Nitroguanidine	8	104.07	-1.33988	-1.72	5.2878	5.92	0.87	1211	Moderate	EC50	Aliphatic_Amines	days_weeks	1.08491	-1.23826	0.537877	-0.935234	4.66963	0.639883
56-81-5	56815	glycerol	22	92.094	-1.97317	-1.65	6	6.94	0.39	1211	Moderate	EC50	Neutral_Organics	days	1.36659	-1.21569	0.436935	-1.0252	5.36096	0.711002
5742-17-6	5742176	2,4-D Isopropylamine salt	12	221.04	-4.08355	2.81	2.83059	5.86	0.47	1211	Moderate	EC50	Neutral_Organics	days_weeks	0.113054	0.221882	0.100553	-0.0565052	4.13986	0.662159
5742-19-8	5742198	2,4-D Diethanolamine salt	10	326.18	-13.821	-2.35	5.94032	5.05	0.04	1211	Moderate	EC50	Neutral_Organics	days_weeks	1.34298	-1.44132	-1.45154	0.733352	4.75076	0.701044
575-41-7	575417	1,3-Dimethylnaphthalene	3	156.23	-1.63451	4.42	0.90309	3.11	0.7	1221	Moderate	EC50	Neutral_Organics	days_weeks	-0.649292	0.740828	0.490914	-0.543386	3.65368	0.713865
57646-30-7	57646307	furalaxyl	6	301.34	-6.27984	2.61	2.36173	4.57	0.36	1211	Moderate	EC50	Esters	days_weeks	-0.0723856	0.157417	-0.249523	0.546743	2.84105	0.968689
57960-19-7	57960197	2-(Acetyloxy)-3-dodecyl-1,4-naphthalenedione	13	386.54	-6.42022	7.44	-2.78542	2.7	1.97	1211	Moderate	EC50	Esters	days_weeks	-2.10814	1.71425	-0.271898	1.1868	1.31897	1.12298
581-42-0	581420	2,6-Dimethylnaphthalene	3	156.23	-2.24565	4.31	0.30103	2.51	0.7	1221	Moderate	EC50	Neutral_Organics	days_weeks	-0.887413	0.705372	0.393502	-0.543386	3.4606	0.759227
583-57-3	583573	1,2-Dimethylcyclohexane	2	112.22	1.2878	4.01	0.716003	3.25	0.7	1221	Moderate	EC50	Neutral_Organics	days_weeks	-0.723287	0.608674	0.956713	-0.874008	3.69882	0.725014
586-62-9	586629	p-mentha-1,4(8)-diene	16	136.24	2.12483	4.88	1.25268	3.37	0.7	1211	Moderate	EC50	Neutral_Organics	days_weeks	-0.511024	0.889098	1.09013	-0.693559	3.87537	0.655384
589-90-2	589902	1,4-Dimethylcyclohexane	2	112.22	1.35603	4.01	0.584331	3.49	0.7	1221	Moderate	EC50	Neutral_Organics	days_weeks	-0.775364	0.608674	0.967587	-0.874008	3.66309	0.733008
590-66-9	590669	1,1-Dimethylcyclohexane	2	112.22	1.35603	4.05	1.03623	3.78	0.7	1221	Moderate	EC50	Neutral_Organics	days_weeks	-0.596634	0.621567	0.967587	-0.874008	3.79318	0.702904
591-21-9	591219	1,3-Dimethylcyclohexane	2	112.22	1.24551	4.01	1.06707	3.88	0.7	1221	Moderate	EC50	Neutral_Organics	days_weeks	-0.584436	0.608674	0.949972	-0.874008	3.79871	0.702963
59720-42-2	59720422	Azadioxabicyclooctane	6	175.19	-3.60906	-2.32	6	5.12	0.37	1211	Moderate	EC50	Aliphatic_Amines	days_weeks	1.36659	-1.43165	0.176183	-0.40095	4.80432	0.628154
5989-27-5	5989275	(R)-p-mentha-1,8-diene	30	136.24	2.2862	4.83	0.886868	3.73	0.75	1211	Moderate	EC50	Neutral_Organics	days_weeks	-0.655708	0.872981	1.11585	-0.693559	3.77549	0.679534
5989-54-8	5989548	(S)-p-mentha-1,8-diene	21	136.24	2.2862	4.83	0.886868	3.96	0.91	1211	Moderate	EC50	Neutral_Organics	days_weeks	-0.655708	0.872981	1.11585	-0.693559	3.77549	0.679534
60-00-4	60004	edetic acid	16	292.25	-9.29883	-3.86	2.39794	4.92	0.69	1211	Moderate	EC50	Aliphatic_Amines	hours_days	-0.0580633	-1.92803	-0.730731	0.478455	4.05005	0.90215
603-35-0	603350	Triphenylphosphine	4	262.29	-2.86657	5.02	0.692741	4.31	0.75	1221	Moderate	EC50	Neutral_Organics	days_weeks	-0.732487	0.934223	0.294532	0.253383	3.54833	0.712214
6062-26-6	6062266	4-(4-Chloro-2-methylphenoxy)butanoic acid sodium salt	10	250.66	-10.8633	-0.31	4.63397	4.25	0.83	1211	Moderate	EC50	Neutral_Organics	days_weeks	0.826311	-0.783775	-0.980095	0.166013	4.45765	0.695254
6164-98-3	6164983	N'-(4-Chloro-2-methylphenyl)-N,N-dimethylmethanimidamide	7	196.68	-3.0348	2.89	2.43136	4.63	0.3	1211	Moderate	EC50	Aliphatic_Amines	days_weeks	-0.0448439	0.247669	0.267717	-0.239508	3.7586	0.664909
61791-63-7	61791637	N-Coco alkyltrimethylenediamines	14	410.78	-8.12668	10.61	-4.63264	3.58	2.15	1211	Moderate	EC50	Aliphatic_Amines	days	-2.83873	2.73603	-0.543897	1.3689	1.7079	0.964687
619-24-9	619249	3-Nitrobenzonitrile	2	148.12	-3.11464	1.17	3.23401	4.73	0.7	1221	Moderate	EC50	Neutral_Organics	days_weeks	0.272611	-0.306733	0.254991	-0.604312	4.29925	0.690203
619-72-7	619727	4-Nitrobenzonitrile	2	148.12	-3.44249	1.19	3.21696	4.54	0.7	1221	Moderate	EC50	Neutral_Organics	days_weeks	0.265866	-0.300286	0.202733	-0.604312	4.28339	0.692297
62-23-7	62237	4-Nitrobenzoic acid	2	167.12	-3.47205	1.69	2.57711	5.29	0.7	1221	Moderate	EC50	Neutral_Organics	days_weeks	0.0128012	-0.139123	0.198022	-0.461575	4.09446	0.715138
630-20-6	630206	1,1,1,2-Tetrachloroethane	2	167.85	1.07918	2.93	3.02938	4.34	0.7	1221	Moderate	EC50	Neutral_Organics	weeks	0.191679	0.260562	0.92346	-0.456091	3.9632	0.707298
634-90-2	634902	1,2,3,5-Tetrachlorobenzene	6	215.89	-1.09151	4.56	0.70757	3.5	0.5	1211	Moderate	EC50	Neutral_Organics	weeks	-0.726622	0.785953	0.577464	-0.0951942	3.21084	0.807664
64-18-6	64186	Formic acid	10	46.025	3.67992	-0.46	6.33041	5.75	0.59	1211	Moderate	EC50	Neutral_Organics	days	1.49727	-0.832124	1.338	-1.37129	5.63461	0.617602
6484-52-2	6484522	Nitric acid ammonium salt	12	80.04	-14.4737	-4.39	6	4.89	0.74	1211	Moderate	EC50	Inorganic_Compound	days_weeks	1.36659	-2.09887	-1.55557	-1.11576	4.35128	0.777526
65-30-5	65305	Nicotine sulfate	10	422.55	-10.7077	0.4	4.01284	4.11	0.37	1211	Moderate	EC50	Aliphatic_Amines	weeks_months	0.580645	-0.554924	-0.955303	1.45732	3.31354	0.861626
65195-55-3	65195553	5-O-Demethyl-antibiotic C 067A1a	15	875.12	-29.8356	4.48	-3.45544	0.95	1.45	1211	Moderate	EC50	Esters	weeks_months	-2.37313	0.760167	-4.00417	4.85723	-0.291421	1.56239
66423-09-4	66423094	N-Methylmethanamine (2R)-2-(4-chloro-2-methylphenoxy)propanoate	6	259.74	-8.57025	1.16	3.33203	4.67	0.79	1211	Moderate	EC50	Neutral_Organics	days_weeks	0.311381	-0.309956	-0.614599	0.234226	4.14774	0.713108
66455-14-9	66455149	C12-13 Alcohols, Ethoxylated	23	214.39	-1.60555	5.96	-0.523603	3.96	0.44	1224	Moderate	EC50	Neutral_Organics	days	-1.21356	1.23721	0.495531	-0.106463	3.43978	0.850355
67564-91-4	67564914	fenpropimorf	16	303.49	-4.58004	4.93	0.633468	3.28	0.71	1211	Moderate	EC50	Aliphatic_Amines	weeks	-0.75593	0.905214	0.0214144	0.562895	2.77183	0.803322
68783-78-8	68783788	Dimethylditallowalkyl quaternary ammonium compounds, Chlorides	10	568.46	-16.4449	11.59	-7.48945	2.66	0.93	1211	Moderate	EC50	Neutral_Organics	days_weeks	-3.96863	3.05191	-1.86977	2.55346	0.695938	1.06759
6980-18-3	6980183	Kasugamycin	7	379.37	-10.011	-5.75	5.09691	4.09	0.49	1211	Moderate	EC50	Aliphatic_Amines	hours_days	1.00941	-2.53723	-0.844246	1.13294	4.81793	0.802368
700-38-9	700389	5-Methyl-2-nitrophenol	4	153.14	-1.69897	2.31	2.43457	4.56	0.84	1221	Moderate	EC50	Phenols	days_weeks	-0.0435762	0.0607193	0.48064	-0.566599	3.48461	0.593623
7003-89-6	7003896	Chlormequat	7	122.62	-4.88941	-3.44	6	5.12	0.63	1211	Moderate	EC50	Neutral_Organics	days_weeks	1.36659	-1.79266	-0.0278967	-0.795879	5.0698	0.68921
7085-19-0	7085190	MCPP Acid	15	214.65	-5.52288	3.2	2.9345	5.03	0.95	1211	Moderate	EC50	Neutral_Organics	days	0.154151	0.34759	-0.128868	-0.10451	4.32686	0.750475
71-63-6	71636	Digitoxin	3	764.96	-26.9626	1.85	0.591065	4.13	1.04	1221	Moderate	EC50	Esters	weeks	-0.772701	-0.0875508	-3.54622	4.02966	1.25012	1.30658
71626-11-4	71626114	Benalaxyl	8	325.41	-5	3.4	1.5682	4.04	0.33	1211	Moderate	EC50	Esters	days_weeks	-0.386233	0.412055	-0.045524	0.727567	2.649	0.983988
72956-09-3	72956093	Carvedilol	7	406.48	-13.2291	4.19	-0.234406	3	1.04	1221	Moderate	EC50	Aliphatic_Amines	days_weeks	-1.09918	0.666693	-1.3572	1.3366	2.64472	0.841227
731-27-1	731271	tolylfluanid	7	347.26	-5.82391	3.9	-0.0457575	2.4	0.65	1211	Moderate	EC50	Neutral_Organics	weeks	-1.02457	0.573218	-0.17685	0.891714	2.84196	0.904056
7398-69-8	7398698	Dimethyldiallylammonium chloride	13	161.68	-5.45223	-2.49	6	4.31	0.75	1211	Moderate	EC50	Neutral_Organics	days_weeks	1.36659	-1.48645	-0.117606	-0.502443	5.04483	0.658146
74-83-9	74839	Bromomethane	18	94.945	5.32623	1.18	4.09377	3.45	0.55	1211	Moderate	EC50	Neutral_Organics	days_weeks	0.612655	-0.303509	1.60041	-1.00379	4.82548	0.590789
74-88-4	74884	Iodomethane	11	141.94	4.73121	1.59	4.09861	3.15	0.19	1211	Moderate	EC50	Neutral_Organics	days_weeks	0.614569	-0.171356	1.50557	-0.650738	4.80449	0.578933
74-96-4	74964	bromoethane	6	108.97	4.79508	1.67	3.82657	5.31	0.75	1221	Moderate	EC50	Neutral_Organics	days_weeks	0.506976	-0.14557	1.51575	-0.898423	4.72758	0.59299
74115-24-5	74115245	Clofentezine	16	303.15	-9.011	3.1	0	2.47	1.81	1211	Moderate	EC50	Neutral_Organics	weeks	-1.00647	0.315357	-0.684852	0.56034	2.75549	0.946616
7440-42-8	7440428	Boron	55	13.84	-6.90658	0.23	4.64068	4.96	0.45	1221	Moderate	EC50	Neutral_Organics	days	0.828963	-0.609719	-0.349421	-1.61308	4.79349	0.755912
7447-41-8	7447418	Lithium chloride	9	42.39	-15.7825	-0.46	5.50826	4.79	0.56	1211	Moderate	EC50	Inorganic_Compound	days	1.1721	-0.832124	-1.76419	-1.3986	4.34684	0.776134
75-64-9	75649	tert-Butylamine	8	73.14	4.67628	0.72	5.75435	4.76	0.53	1211	Moderate	EC50	Aliphatic_Amines	days_weeks	1.26943	-0.451779	1.49682	-1.16759	4.98608	0.491153
7553-56-2	7553562	Iodine	12	253.81	-0.632644	2.49	2.51851	3.13	0.88	1211	Moderate	EC50	Inorganic_Compound	days_weeks	-0.0103751	0.118738	0.650606	0.189677	3.7568	0.678976
76-22-2	76222	Camphor	8	152.24	0.154214	3.04	3.01098	4.75	0.92	1211	Moderate	EC50	Neutral_Organics	days_weeks	0.184399	0.296017	0.776026	-0.57336	4.33005	0.62013
7601-89-0	7601890	Sodium perchlorate	17	122.44	-18.0386	-7.18	6.32222	6.5	0.33	1211	Moderate	EC50	Inorganic_Compound	days_weeks	1.49403	-2.99816	-2.12379	-0.797231	4.34554	0.875824
7631-86-9	7631869	Silica	74	60.08	-7.27084	0.53	4.6852	5.55	1.13	1222	Moderate	EC50	Neutral_Organics	days	0.846573	-0.513021	-0.407481	-1.26571	4.7923	0.744261
7631-89-2	7631892	Arsenic acid, Sodium salt	4	185.91	-19.9626	-7.29	5.42651	4.36	0.86	1221	Moderate	EC50	Neutral_Organics	days_weeks	1.13977	-3.03361	-2.43047	-0.320417	4.43342	0.94299
76578-12-6	76578126	Quizalofop	2	344.76	-9.36754	3.57	-0.522879	4.69	0.84	1221	Moderate	EC50	Neutral_Organics	days_weeks	-1.21328	0.46685	-0.741683	0.872933	2.99312	0.875562
7664-38-2	7664382	Phosphoric acid	33	98	-10.2154	-0.77	5.73127	5.03	0.38	1222	Moderate	EC50	Inorganic_Compound	days_weeks	1.2603	-0.932046	-0.876824	-0.980835	4.3897	0.642446
7664-93-9	7664939	Sulfuric acid	8	98.07	-4.22695	-2.2	6	4.91	0.41	1211	Moderate	EC50	Inorganic_Compound	days_weeks	1.36659	-1.39297	0.0776962	-0.980309	4.6743	0.645046
7704-34-9	7704349	Sulfur	13	34.08	-8.41908	-1.38	6	5.83	0.56	1211	Moderate	EC50	Inorganic_Compound	days	1.36659	-1.12866	-0.590503	-1.46103	4.73767	0.739067
7747-35-5	7747355	7a-Ethyldihydro-1H,3H,5H-oxazolo[3,4-c]oxazole	16	143.19	1.99347	0.4	5.45332	4.74	0.72	1211	Moderate	EC50	Aliphatic_Amines	weeks	1.15037	-0.554924	1.06919	-0.641348	4.40955	0.625134
7757-79-1	7757791	Potassium nitrate	22	101.1	-16.9788	-0.79	5.74028	5.84	0.48	1211	Moderate	EC50	Inorganic_Compound	days	1.26387	-0.938492	-1.95487	-0.957546	4.37657	0.779542
7757-83-7	7757837	Sodium sulfite	17	126.04	-18.3546	-7.78	6	6.05	0.66	1211	Moderate	EC50	Inorganic_Compound	days_weeks	1.36659	-3.19155	-2.17416	-0.770186	4.24622	0.919428
7758-19-2	7758192	Chlorous acid, Sodium salt (1:1)	37	90.44	-16.0137	-7.18	6	3.9	1.4	1211	Moderate	EC50	Inorganic_Compound	days_weeks	1.36659	-2.99816	-1.80104	-1.03763	4.31934	0.885592
7778-80-5	7778805	Potassium sulfate	11	174.25	-18.757	-4.38	6	5.94	0.39	1211	Moderate	EC50	Inorganic_Compound	days_weeks	1.36659	-2.09564	-2.2383	-0.408012	4.21	0.799753
78-51-3	78513	tris(2-butoxyethyl) phosphate	23	398.48	-3.78526	3	0.38819	4.5	0.33	1211	Moderate	EC50	Esters	hours_days	-0.85294	0.283124	0.148097	1.2765	2.81336	1.02707
78-79-5	78795	Isoprene	7	68.119	4.86598	2.58	2.74181	4.57	0.65	1211	Moderate	EC50	Neutral_Organics	days_weeks	0.077942	0.147747	1.52705	-1.20531	4.41085	0.628842
78-92-2	78922	2-Butanol	20	74.123	3.4387	0.77	4.93015	6.39	0.26	1211	Moderate	EC50	Neutral_Organics	days	0.943453	-0.435663	1.29955	-1.16021	5.21441	0.663654
78-93-3	78933	butanone	27	72.107	4.11827	0.26	5.29447	6.35	0.4	1211	Moderate	EC50	Neutral_Organics	days_weeks	1.08754	-0.60005	1.40787	-1.17535	5.13825	0.553935
78-96-6	78966	1-Amino-2-propanol	8	75.112	2.01019	-1.19	6	5.44	0.64	1211	Moderate	EC50	Aliphatic_Amines	days	1.36659	-1.06742	1.07186	-1.15278	5.18906	0.659337
78-99-9	78999	1,1-Dichloropropane	2	112.99	1.70586	2.25	3.43136	4.68	0.7	1221	Moderate	EC50	Neutral_Organics	days_weeks	0.350666	0.0413797	1.02335	-0.868223	4.50781	0.613576
79-09-4	79094	Propionic acid	20	74.079	2.90587	0.58	5.54283	4.97	0.37	1211	Moderate	EC50	Neutral_Organics	days	1.18577	-0.496905	1.21462	-1.16054	5.37487	0.634398
79-10-7	79107	Acrylic acid	28	72.063	2.90443	0.44	5.17898	5.02	0.68	1221	Moderate	EC50	Neutral_Organics	days	1.04187	-0.542031	1.21439	-1.17568	5.27081	0.662505
79-33-4	79334	l-(+)-lactic acid	11	90.078	0.581196	-0.65	5.88762	5.56	0.46	1211	Moderate	EC50	Neutral_Organics	days	1.32214	-0.893366	0.844084	-1.04035	5.406	0.668841
79-92-5	79925	Camphene	21	136.24	2.37525	4.35	1.2467	4.16	1.01	1211	Moderate	EC50	Neutral_Organics	days_weeks	-0.513392	0.718265	1.13005	-0.693559	3.88547	0.673429
79241-46-6	79241466	Fluazifop-p-butyl	14	383.37	-6.60555	4.5	0.30103	3.27	1.18	1211	Moderate	EC50	Esters	days_weeks	-0.887413	0.766614	-0.301438	1.16299	2.22308	1.03345
80-33-1	80331	Chlorfenson	6	303.16	-5.72584	4.21	0.471438	4.3	0.55	1224	Moderate	EC50	Esters	weeks	-0.820014	0.673139	-0.161219	0.560416	1.8998	1.11766
8002-13-9	8002139	Rapeseed oil	6	447.02	-7.10403	7.09	-2.86423	3.94	0.24	1211	Moderate	EC50	Esters	days	-2.13931	1.60144	-0.380893	1.64115	1.48316	1.24541
8004-87-3	8004873	C.I. Basic Violet 1	7	393.96	-12.0655	0.43	4.51851	4.86	1.47	1211	Moderate	EC50	Neutral_Organics	weeks	0.780645	-0.545254	-1.17172	1.24254	3.97631	0.771682
81-81-2	81812	warfarin	23	308.33	-8.82595	2.23	1.60186	4.45	1.19	1211	Moderate	EC50	Esters	days_weeks	-0.372919	0.0349332	-0.655357	0.599255	2.54047	1.04394
82-66-6	82666	2-(Diphenylacetyl)-1H-indene-1,3(2H)-dione	15	340.38	-9.98716	4.27	-0.522879	4.26	0.81	1211	Moderate	EC50	Neutral_Organics	weeks	-1.21328	0.692479	-0.840447	0.840028	2.56457	0.943025
83-41-0	83410	1,2-Dimethyl-3-nitrobenzene	2	151.17	-0.444906	2.83	2.06819	3.71	0.7	1221	Moderate	EC50	Neutral_Organics	days_weeks	-0.188484	0.228329	0.68053	-0.581399	4.03974	0.690629
83-89-6	83896	Quinacrine	7	399.97	-9.75696	5.75	-1.5293	4.84	0.88	1211	Moderate	EC50	Aliphatic_Amines	weeks	-1.61133	1.16952	-0.803754	1.28769	1.97171	0.938465
86-57-7	86577	1-Nitronaphthalene	3	173.17	-3.31876	3.19	0.962843	3.97	0.7	1221	Moderate	EC50	Neutral_Organics	days_weeks	-0.625659	0.344366	0.222456	-0.416125	3.6237	0.763016
89-60-1	89601	1-Chloro-4-methyl-2-nitrobenzene	2	171.58	-1.82102	3	1.82724	4.01	0.7	1221	Moderate	EC50	Neutral_Organics	days_weeks	-0.283781	0.283124	0.461185	-0.42807	3.92372	0.707082
90-15-3	90153	1-Naphthol	13	144.17	-3.56225	2.85	2.93752	3.52	0.38	1211	Moderate	EC50	Phenols	days_weeks	0.155345	0.234775	0.183645	-0.633986	3.56462	0.552193
90717-03-6	90717036	quinmerac	6	221.64	-6.86328	0.78	2.3483	4.98	0.18	1211	Moderate	EC50	Neutral_Organics	days_weeks	-0.0776946	-0.43244	-0.342519	-0.0519977	3.92279	0.780135
91-64-5	91645	coumarin	16	146.15	-1.0576	1.51	3.14913	3.92	0.75	1211	Moderate	EC50	Esters	days	0.239039	-0.197142	0.58287	-0.619111	3.4549	1.03189
93-08-3	93083	2'-acetonaphthone	11	170.21	-3.21396	2.85	2.43457	3.88	0.48	1211	Moderate	EC50	Neutral_Organics	days_weeks	-0.0435762	0.234775	0.23916	-0.438362	4.05401	0.681267
93-72-1	93721	2-(2,4,5-Trichlorophenoxy)propanoic acid	12	269.51	-5.58838	3.8	2.30103	3.88	0.88	1211	Moderate	EC50	Neutral_Organics	days_weeks	-0.0963922	0.540985	-0.139308	0.307622	3.9308	0.668228
94-11-1	94111	2-(2,4-Dichlorophenoxy)acetic acid, 1-Methylethyl ester	7	263.12	-3.63451	3.81	1.57171	2.92	0.84	1221	Moderate	EC50	Esters	days_weeks	-0.384846	0.544209	0.172126	0.259618	2.69226	0.961878
94-82-6	94826	2,4-DB	12	249.09	-4.19586	3.53	1.66276	4.2	0.35	1211	Moderate	EC50	Neutral_Organics	days_weeks	-0.348835	0.453957	0.0826509	0.154218	3.7944	0.711054
95-16-9	95169	Benzothiazole	22	135.19	0.995234	2.17	3.04922	4.58	0.58	1211	Moderate	EC50	Neutral_Organics	days_weeks	0.199524	0.0155936	0.910079	-0.701447	4.37468	0.644435
95-56-7	95567	2-Bromophenol	3	173.01	-0.595166	2.35	3.34772	4.16	0.84	1221	Moderate	EC50	Phenols	days_weeks	0.317584	0.0736123	0.656579	-0.417327	3.78415	0.528433
95-87-4	95874	2,5-xylenol	2	122.17	-0.806875	2.33	3.549	3.91	0.84	1221	Moderate	EC50	Phenols	days_weeks	0.397194	0.0671658	0.622834	-0.799259	3.83537	0.517495
95-93-2	95932	1,2,4,5-Tetramethylbenzene	2	134.22	-0.277366	4	0.541579	3.51	0.7	1221	Moderate	EC50	Neutral_Organics	days_weeks	-0.792273	0.605451	0.707235	-0.708734	3.59697	0.744691
950-35-6	950356	Methyl paraoxon	2	247.15	-4.48149	1.33	2.86392	2.52	1.01	1221	Moderate	EC50	Esters	days	0.126235	-0.25516	0.037124	0.139644	3.26096	1.07449
953-17-3	953173	Methyl trithion	9	314.8	-4.57349	4.82	0.20412	2.32	1.04	1211	Moderate	EC50	Esters	days_weeks	-0.925742	0.869758	0.0224593	0.64786	2.25996	1.01742
95465-99-9	95465999	Cadusafos	11	270.39	-3.04576	3.9	2.39445	2.66	1.36	1211	Moderate	EC50	Esters	days	-0.059443	0.573218	0.26597	0.314233	3.15551	1.00464
96182-53-5	96182535	Phostebupirim	9	318.37	-4.42597	4.19	0.740363	1.48	1.44	1211	Moderate	EC50	Esters	days_weeks	-0.713652	0.666693	0.0459731	0.67468	2.42377	1.00519
99-51-4	99514	4-nitro-o-xylene	2	151.17	-2.44491	2.91	1.99983	4.08	0.7	1221	Moderate	EC50	Neutral_Organics	days_weeks	-0.215521	0.254115	0.361742	-0.581399	3.95355	0.702646
99-71-8	99718	4-(1-Methylpropyl)phenol	2	150.22	-1.42946	3.08	2.98227	3.06	0.84	1221	Moderate	EC50	Phenols	days_weeks	0.173046	0.308911	0.523599	-0.588536	3.64629	0.529868
99-96-7	99967	4-Hydroxybenzoic acid	18	138.12	-3.02821	1.39	4.07408	4.96	0.52	1211	Moderate	EC50	Phenols	days_weeks	0.604869	-0.235821	0.268766	-0.679436	3.91996	0.529566
999-97-3	999973	Hexamethyldisilazane	18	161.4	3.22174	2.62	1.47355	5.11	0.75	1221	Moderate	EC50	Neutral_Organics	days_weeks	-0.423671	0.16064	1.26497	-0.504547	3.9905	0.716547
100-02-7	100027	4-Nitrophenol	62	139.11	-1.41277	1.91	4.57978	4.1	0.56	1111	High	EC50	Phenols	days_weeks	0.803914	-0.160555	0.545264	-0.765067	4.11559	0.470336
100-41-4	100414	ethylbenzene	75	106.17	3.00507	3.03	2.22191	4.24	0.71	1111	High	EC50	Neutral_Organics	days_weeks	-0.0786709	0.203619	1.30531	-1.03221	4.19648	0.65552
100-42-5	100425	Styrene	19	104.15	2.82812	2.89	2.46627	4.25	0.49	1111	High	EC50	Neutral_Organics	days_weeks	0.0127982	0.158097	1.27487	-1.04859	4.26208	0.645964
100-61-8	100618	N-Methylaniline	27	107.16	1.76432	1.62	3.41731	4.25	1.17	1111	High	EC50	Neutral_Organics	days_weeks	0.368782	-0.25485	1.09185	-1.02418	4.50994	0.636728
10004-44-1	10004441	Hymexazol	14	99.09	-2.86328	0.46	4.92942	4.75	0.88	1111	High	EC50	Phenols	days_weeks	0.934787	-0.63203	0.295718	-1.08963	4.17842	0.507743
10043-35-3	10043353	Boric acid (H3BO3)	186	61.83	-16.1331	0.17	4.69897	5.35	0.37	1111	High	EC50	Neutral_Organics	days	0.848527	-0.726325	-1.98723	-1.3918	4.50653	0.803012
10049-04-4	10049044	Chlorine oxide (ClO2)	54	67.45	-7.56225	-3.22	6	4.73	1.75	1111	High	EC50	Inorganic_Compound	days	1.33552	-1.8286	-0.512693	-1.34623	4.77834	0.800463
10102-18-8	10102188	Selenious acid, Disodium salt	132	172.94	-17.3242	-7.33	6	3.77	0.63	1111	High	EC50	Neutral_Organics	days_weeks	1.33552	-3.16499	-2.19214	-0.490707	4.68611	0.894126
10102-44-0	10102440	Nitrogen oxide	15	46.01	-9.21325	-0.58	5.23274	4.28	0.69	1111	High	EC50	Inorganic_Compound	days	1.04832	-0.970192	-0.796732	-1.5201	4.48475	0.763276
10265-92-6	10265926	Methamidophos	38	141.13	-4.45223	-0.8	6	3.79	1.1	1111	High	EC50	Esters	days_weeks	1.33552	-1.04173	0.0223556	-0.748685	3.97389	0.850371
10453-86-8	10453868	Resmethrin	74	338.45	-3.85387	6.14	-0.522879	0.58	0.92	1111	High	EC50	Esters	days_weeks	-1.10608	1.21485	0.125296	0.851571	2.06505	1.01246
105-37-3	105373	Ethyl propionate	29	102.13	1.55509	1.21	4.2833	5.14	0.52	1111	High	EC50	Esters	days	0.692936	-0.388164	1.05586	-1.06497	3.87024	0.956902
10599-90-3	10599903	Chloramide	99	51.48	-8.93554	-1.19	6	2.24	0.75	1111	High	EC50	Inorganic_Compound	days	1.33552	-1.16854	-0.748955	-1.47574	4.71936	0.734983
106-42-3	106423	p-xylene	27	106.17	2.96179	3.09	2.27848	3.96	0.54	1111	High	EC50	Neutral_Organics	days_weeks	-0.0574961	0.223128	1.29786	-1.03221	4.21096	0.65001
106-46-7	106467	1,4-Dichlorobenzene	71	147	1.94437	3.28	2.07449	3.74	0.83	1111	High	EC50	Neutral_Organics	days_weeks	-0.133853	0.284908	1.12283	-0.701079	4.11729	0.661511
106-48-9	106489	4-Chlorophenol	52	128.56	0.727975	2.16	4.05591	3.98	0.53	1111	High	EC50	Phenols	days_weeks	0.607822	-0.0792662	0.913558	-0.850627	4.03335	0.48333
107-06-2	107062	1,2-Dichloroethane	56	98.96	4.0022	1.83	3.99509	5.23	0.52	1111	High	EC50	Neutral_Organics	days_weeks	0.585055	-0.186567	1.47686	-1.09068	4.74898	0.580747
107-11-9	107119	allylamine	46	57.097	4.53476	0.21	6	4.41	0.54	1111	High	EC50	Aliphatic_Amines	days	1.33552	-0.713319	1.56848	-1.43019	5.26283	0.595874
107-15-3	107153	Ethylenediamine	37	60.102	3.37768	-1.62	6	5.17	0.74	1111	High	EC50	Aliphatic_Amines	days	1.33552	-1.30835	1.36941	-1.40582	5.23704	0.66753
107-21-1	107211	1,2-Ethanediol	33	62.068	0.909447	-1.2	5.86213	7.18	0.48	1111	High	EC50	Neutral_Organics	days	1.28391	-1.17179	0.944779	-1.38987	5.41318	0.68843
107-41-5	107415	2-Methyl-2,4-pentanediol	40	118.18	0.890499	0.58	5.72263	6.91	0.22	1111	High	EC50	Neutral_Organics	days_weeks	1.2317	-0.593012	0.941519	-0.934808	5.15319	0.532325
1071-83-6	1071836	Glyphosate	75	169.07	-7.80134	-5.4	6.02119	4.63	0.88	1111	High	EC50	Aliphatic_Amines	days	1.34345	-2.53744	-0.553827	-0.522093	4.90013	0.860539
108-18-9	108189	Diisopropylamine	41	101.19	1.94372	1.64	4.77832	5.14	0.59	1111	High	EC50	Aliphatic_Amines	days_weeks	0.87823	-0.248347	1.12271	-1.0726	4.60822	0.53453
108-38-3	108383	m-xylene	21	106.17	2.94569	3.09	2.27827	3.99	0.48	1111	High	EC50	Neutral_Organics	days_weeks	-0.0575731	0.223128	1.29509	-1.03221	4.21037	0.650108
108-46-3	108463	resorcinol	33	110.11	-1.79599	1.03	5.52114	4.52	0.73	1111	High	EC50	Phenols	days	1.15628	-0.446692	0.479335	-1.00026	4.58757	0.545445
108-88-3	108883	toluene	86	92.141	3.49958	2.54	2.66404	4.65	0.74	1111	High	EC50	Neutral_Organics	days_weeks	0.0868246	0.0442929	1.39039	-1.14598	4.34363	0.642414
108-90-7	108907	Chlorobenzene	71	112.56	3.09191	2.64	2.30001	4.17	0.74	1111	High	EC50	Neutral_Organics	days_weeks	-0.0494375	0.0768085	1.32025	-0.980386	4.2245	0.664078
108-95-2	108952	Phenol	416	94.113	1.63403	1.51	4.54915	4.75	0.79	1111	High	EC50	Phenols	days	0.792447	-0.290617	1.06944	-1.12999	4.41701	0.571834
1085-98-9	1085989	Dichlofluanid	12	333.23	-6.95078	3.7	0.113943	2.71	1.07	1111	High	EC50	Neutral_Organics	weeks	-0.867711	0.421473	-0.407496	0.809237	2.85223	0.90703
109-89-7	109897	Diethylamine	30	73.14	4.49774	0.81	5.62118	5.04	0.54	1111	High	EC50	Aliphatic_Amines	days	1.19372	-0.518226	1.56211	-1.30008	5.14828	0.598611
110-54-3	110543	Hexane	42	86.178	4.30092	3.29	1.96008	4.96	0.78	1111	High	EC50	Neutral_Organics	days	-0.176677	0.28816	1.52825	-1.19434	4.36902	0.757277
110-82-7	110827	Cyclohexane	33	84.162	4.0975	3.18	2.05831	4.8	0.99	1111	High	EC50	Neutral_Organics	days_weeks	-0.139908	0.252392	1.49325	-1.21069	4.18428	0.654767
110-86-1	110861	Pyridine	44	79.103	3.41039	0.8	6.10037	5.21	0.86	1111	High	EC50	Neutral_Organics	days_weeks	1.37309	-0.521478	1.37504	-1.25172	5.34375	0.487191
110-91-8	110918	Morpholine	23	87.123	3.16226	-0.56	6.55991	4.99	0.68	1111	High	EC50	Aliphatic_Amines	days	1.5451	-0.963689	1.33235	-1.18668	5.3843	0.59517
11067-81-5	11067815	Tetrapropylenebenzenesulfonic acid	20	326.5	-6.87615	6.32	-1.46496	4.39	0.68	1111	High	EC50	Esters	days_weeks	-1.45872	1.27338	-0.394657	0.754657	1.69243	1.08172
11097-69-1	11097691	Aroclor 1254	42	326.44	-5.18509	6.79	-2.46852	2.17	1.47	1111	High	EC50	Neutral_Organics	weeks_months	-1.83436	1.4262	-0.103726	0.754171	1.88285	1.02901
111-27-3	111273	1-Hexanol	42	102.18	2.06981	1.82	4.05683	5.26	0.42	1111	High	EC50	Neutral_Organics	days	0.608164	-0.189819	1.14441	-1.06457	4.91026	0.688668
111-42-2	111422	Diethanolamine	45	105.14	-1.14117	-1.71	5.49831	5.21	0.77	1111	High	EC50	Aliphatic_Amines	days	1.14773	-1.33762	0.59199	-1.04056	4.94395	0.726412
111-70-6	111706	1-Heptanol	44	116.2	1.6005	2.31	3.1726	4.81	0.36	1111	High	EC50	Neutral_Organics	days	0.277187	-0.0304928	1.06367	-0.950866	4.6364	0.729691
111-87-5	111875	1-Octanol	59	130.23	1.12047	2.81	2.79495	4.5	0.4	1111	High	EC50	Neutral_Organics	days	0.135825	0.132085	0.981082	-0.837083	4.50825	0.738271
111-90-0	111900	2-(2-ethoxyethoxy)ethanol	24	134.18	1.09703	-0.69	6.25768	7.11	0.32	1111	High	EC50	Neutral_Organics	days	1.43197	-1.00596	0.977051	-0.805049	5.53003	0.644075
1113-02-6	1113026	Omethoate	15	213.19	-4.60555	-0.74	6	4.2	1.56	1111	High	EC50	Esters	days	1.33552	-1.02222	-0.00402209	-0.164282	4.17554	0.950321
112-02-7	112027	cetrimonium chloride	18	320.01	-7.42801	3.18	-2.23156	2.52	0.83	1111	High	EC50	Neutral_Organics	days_weeks	-1.74567	0.252392	-0.489599	0.702024	2.56678	0.987717
112-27-6	112276	Triethylene glycol	33	150.17	-1.57632	-1.75	6.97497	7.08	0.73	1111	High	EC50	Neutral_Organics	days	1.70047	-1.35062	0.517127	-0.675371	5.65598	0.650632
115-86-6	115866	triphenyl phosphate	66	326.29	-4.20123	4.7	0.353647	3.17	0.84	1111	High	EC50	Esters	days	-0.777987	0.746629	0.0655373	0.752954	2.52329	1.11156
115-96-8	115968	tris(2-chloroethyl) phosphate	32	285.49	-1.28299	1.63	2.6689	5.21	0.81	1111	High	EC50	Esters	days_weeks	0.0886431	-0.251599	0.567591	0.422068	3.10101	0.95796
117-81-7	117817	bis(2-ethylhexyl) phthalate	41	390.56	-2.56767	8.39	-1.73241	3.63	1.28	1111	High	EC50	Esters	hours_days	-1.55882	1.94645	0.346574	1.27418	2.20536	0.962109
118-74-1	118741	Hexachlorobenzene	17	284.78	-4.74473	5.73	-2.20761	2.9	1.5	1111	High	EC50	Neutral_Organics	weeks_months	-1.7367	1.08154	-0.0279665	0.41631	1.9798	1.0481
1194-65-6	1194656	Dichlobenil	98	172.01	-1.11025	2.83	1.79619	3.97	0.58	1111	High	EC50	Neutral_Organics	weeks	-0.238025	0.138588	0.59731	-0.498249	3.53594	0.800667
120-12-7	120127	Anthracene	26	178.23	-3.53871	4.35	-0.177374	1.27	0.81	1111	High	EC50	Neutral_Organics	weeks	-0.976755	0.632824	0.179517	-0.447806	2.87629	0.884237
120-36-5	120365	Dichlorprop	25	235.07	-6.33255	-0.25	2.77085	3.91	1.08	1111	High	EC50	Neutral_Organics	days_weeks	0.126806	-0.862891	-0.301135	0.0131642	4.06914	0.787425
120-82-1	120821	1,2,4-Trichlorobenzene	80	181.45	1.38728	3.93	1.48224	3.47	0.51	1111	High	EC50	Neutral_Organics	weeks	-0.355538	0.496259	1.02699	-0.421692	3.52029	0.768012
120-83-2	120832	2,4-Dichlorophenol	81	163	0.942396	2.8	3.5566	3.85	0.64	1111	High	EC50	Phenols	days_weeks	0.420923	0.128833	0.950447	-0.57132	3.89206	0.490953
120928-09-8	120928098	Fenazaquin	23	306.41	-7.59346	5.51	-0.657577	1.51	1.11	1111	High	EC50	Neutral_Organics	days_weeks	-1.1565	1.01	-0.518063	0.591728	2.99965	0.805258
121-69-7	121697	N,N-Dimethylaniline	28	121.18	1.8238	2.17	4.1567	4.66	0.53	1111	High	EC50	Neutral_Organics	days_weeks	0.645548	-0.0760146	1.10208	-0.910478	4.72149	0.5698
121-75-5	121755	Malathion	475	330.36	-5.47108	2.36	2.15534	2.45	1.32	1111	High	EC50	Esters	hours_days	-0.10359	-0.0142351	-0.152929	0.785962	3.27189	0.946763
12125-02-9	12125029	Ammonium chloride ((NH4)Cl)	189	53.49	-11.6253	-4.37	5.57054	3.83	1.06	1111	High	EC50	Inorganic_Compound	days	1.17477	-2.20253	-1.21169	-1.45944	4.52827	0.890329
121552-61-2	121552612	Cyprodinil	22	225.3	-5.43415	4	1.11394	3.02	0.71	1111	High	EC50	Neutral_Organics	days_weeks	-0.493398	0.51902	-0.146575	-0.0660701	3.59208	0.735567
122-14-5	122145	Fenitrothion	312	277.24	-4.26761	3.3	1.57978	2.2	1.4	1111	High	EC50	Esters	days_weeks	-0.319027	0.291411	0.0541175	0.355161	2.67716	0.982974
122-39-4	122394	Difenylamine	25	169.23	-0.887951	3.29	1.86307	3.08	0.52	1111	High	EC50	Neutral_Organics	days_weeks	-0.212991	0.28816	0.635554	-0.520795	3.96286	0.689501
123-31-9	123319	hydroquinone	29	110.11	-2.66033	1.03	5.0086	2.45	0.68	1111	High	EC50	Phenols	days	0.964425	-0.446692	0.330634	-1.00026	4.41122	0.582521
124-40-3	124403	dimethylamine	29	45.086	5.29215	-0.17	6	4.89	0.52	1111	High	EC50	Aliphatic_Amines	days	1.33552	-0.836878	1.69878	-1.5276	5.29037	0.605493
126-73-8	126738	tributyl phosphate	114	266.32	-0.332344	3.82	3.00501	4.1	0.49	1111	High	EC50	Esters	hours_days	0.214454	0.460492	0.731141	0.2666	3.67656	0.813458
12674-11-2	12674112	Aroclor 1016	23	257.55	-3.39794	5.62	-0.376751	1.84	0.94	1111	High	EC50	Neutral_Organics	weeks	-1.05138	1.04577	0.203735	0.195476	2.81484	0.85065
13071-79-9	13071799	Terbufos	80	288.43	-3.49485	4.48	0.705008	1.1	1.09	1111	High	EC50	Esters	days_weeks	-0.646468	0.675094	0.187063	0.445911	2.44231	0.99213
131-11-3	131113	dimethyl phthalate	25	194.19	-0.210528	1.66	3.29533	4.99	0.42	1111	High	EC50	Esters	days	0.323123	-0.241844	0.752098	-0.318371	3.52399	1.01278
131-52-2	131522	Pentachlorophenol, Sodium salt	114	288.32	-10.5686	2.05	5.51851	2.4	0.59	1111	High	EC50	Phenols	weeks_months	1.15529	-0.115033	-1.02991	0.445019	3.41847	0.621438
1313-82-2	1313822	Sodium sulfide	223	78.04	-16.3382	-4.23	5.26951	3.33	1.4	1111	High	EC50	Inorganic_Compound	days	1.06209	-2.15701	-2.02251	-1.26034	4.2851	0.929264
13171-21-6	13171216	Phosphamidon	82	299.69	-4.60206	0.79	0	3.41	1.43	1111	High	EC50	Esters	days	-0.910362	-0.524729	-0.00342196	0.537229	2.43445	1.27618
131860-33-8	131860338	Azoxystrobin	28	403.4	-12.0835	2.5	0.778151	2.65	0.47	1111	High	EC50	Esters	days_weeks	-0.619089	0.0312867	-1.29054	1.37831	2.19363	1.1037
1319-77-3	1319773	Cresol	63	108.14	-0.769551	1.95	4.4133	4.26	0.28	1111	High	EC50	Phenols	days_weeks	0.741596	-0.147549	0.655924	-1.01623	4.0885	0.476074
13194-48-4	13194484	Ethoprophos	67	242.34	-3.42022	3.59	2.87506	2.58	1.22	1111	High	EC50	Esters	days	0.165813	0.385706	0.199903	0.0721235	3.2839	0.987226
1320-18-9	1320189	2-(2,4-Dichlorophenoxy)acetic acid 2-butoxymethylethyl ester	35	349.21	-4.75203	4.34	0.0948204	3.03	0.46	1111	High	EC50	Esters	days_weeks	-0.874869	0.629573	-0.0292223	0.938834	2.22578	1.04249
1327-53-3	1327533	Arsenic oxide (As203)	78	197.84	-8.67572	-0.13	4.23045	3.59	1.03	1111	High	EC50	Neutral_Organics	days_weeks	0.673153	-0.823872	-0.704255	-0.288769	4.41214	0.702874
1330-20-7	1330207	Dimethylbenzene	51	106.17	0.902547	3.16	2.02531	4.59	0.71	1111	High	EC50	Neutral_Organics	days_weeks	-0.152262	0.245889	0.943592	-1.03221	4.06957	0.674423
1330-78-5	1330785	Tricresyl phosphate	55	368.37	-6.22185	5.11	-0.443697	3.3	1.18	1111	High	EC50	Esters	days_weeks	-1.07644	0.879942	-0.282091	1.09422	2.01678	1.05682
13410-01-0	13410010	Selenic acid, Disodium salt	34	188.94	-17.158	-7.33	6	4.08	0.73	1111	High	EC50	Neutral_Organics	days_weeks	1.33552	-3.16499	-2.16355	-0.360948	4.69159	0.893249
13457-18-6	13457186	Afugan	18	373.37	-6.64397	3.8	0.623249	3.14	1.24	1111	High	EC50	Esters	days	-0.677071	0.453989	-0.354713	1.13477	2.52661	1.13957
135-19-3	135193	2-Naphthol	14	144.17	-1.66033	2.69	2.39716	3.6	0.43	1111	High	EC50	Phenols	days_weeks	-0.0130731	0.0930662	0.502674	-0.724031	3.47252	0.58218
135158-54-2	135158542	1,2,3-Benzothiadiazole-7-carbothioic acid S-methyl ester	16	210.27	-5.48149	3.1	0.886491	3.21	0.75	1111	High	EC50	Esters	days_weeks	-0.578536	0.22638	-0.154719	-0.187963	2.43849	1.04053
13593-03-8	13593038	Quinalphos	17	298.3	-5.58503	4.44	1.34242	2.55	1.21	1111	High	EC50	Esters	days	-0.407875	0.662088	-0.172532	0.525957	2.76466	1.06543
13674-84-5	13674845	Tris(2-chloroethyl) phosphate	33	327.57	-2.12389	2.89	1.47561	4.81	0.29	1111	High	EC50	Esters	days_weeks	-0.35802	0.158097	0.422923	0.763335	2.72055	0.992967
13863-41-7	13863417	Bromine chloride (BrCl)	15	115.36	-8.62525	0.94	4.21643	2.53	0.3	1111	High	EC50	Inorganic_Compound	days_weeks	0.667905	-0.475956	-0.695573	-0.957678	3.99358	0.668916
1397-94-0	1397940	Antimycin A	55	548.64	-21.5114	4.21	-1.05056	-0.22	1.26	1111	High	EC50	Esters	hours_days	-1.3036	0.587303	-2.91252	2.5562	1.80575	1.16847
141-43-5	141435	Ethanolamine	44	61.085	1.73655	-1.61	6	5.35	0.77	1111	High	EC50	Aliphatic_Amines	days	1.33552	-1.3051	1.08707	-1.39785	5.18287	0.675825
141-66-2	141662	Dicrotophos	66	237.19	-3.79588	0	6	3.23	0.93	1111	High	EC50	Esters	days	1.33552	-0.781602	0.135273	0.0303573	4.19724	0.919543
141-78-6	141786	Ethyl acetate	63	88.106	4.11738	0.86	4.58065	5.8	0.45	1111	High	EC50	Esters	days	0.804238	-0.501968	1.49667	-1.17871	4.04286	0.937064
141517-21-7	141517217	Trifloxystrobine	16	408.38	-7.25026	4.5	-0.408935	1.8	0.67	1111	High	EC50	Aliphatic_Amines	weeks	-1.06343	0.681598	-0.459019	1.4187	2.38599	0.898943
143-33-9	143339	Sodium cyanide	113	49.01	-11.7258	-1.69	6	2.75	1.17	1111	High	EC50	Neutral_Organics	days	1.33552	-1.33111	-1.229	-1.49577	5.03971	0.763858
143-50-0	143500	1,1a,3,3a,4,5,5,5a,5b,6-Decachlorooctahydro-1,3,4-metheno-2H-cyclobuta[cd]pentalen-2-one	50	490.64	-6.64782	5.41	0.431364	1.91	0.53	1111	High	EC50	Neutral_Organics	recalcitrant	-0.748897	0.977489	-0.355374	2.08582	2.94255	0.855314
143390-89-0	143390890	Kresoxim-Methyl	17	313.35	-3.7748	5.88	0.619605	2.2	0.46	1111	High	EC50	Aliphatic_Amines	days_weeks	-0.678435	1.13031	0.1389	0.648011	3.19136	0.676652
145-73-3	145733	7-Oxabicyclo[2.2.1]heptane-2,3-dicarboxylic acid	45	186.17	-9.8041	1.91	5	4.03	1.13	1111	High	EC50	Neutral_Organics	hours_days	0.961206	-0.160555	-0.898382	-0.383413	5.0452	0.547207
14816-18-3	14816183	Phoxim	24	298.3	-4.80134	4.39	0.612784	2.3	0.95	1111	High	EC50	Esters	days_weeks	-0.680989	0.64583	-0.0377066	0.525957	2.37324	1.00809
151-21-3	151213	Dodecyl sulfate	142	288.38	-11.7447	1.6	5	3.74	0.6	1111	High	EC50	Neutral_Organics	days_weeks	0.961206	-0.261353	-1.23225	0.445506	4.52129	0.608257
151-50-8	151508	Potassium cyanide	89	65.12	-12.7423	-1.69	5.85733	2.63	1.1	1111	High	EC50	Neutral_Organics	days	1.28212	-1.33111	-1.40387	-1.36512	4.96504	0.778269
15307-79-6	15307796	sodium [2-[(2,6-dichlorophenyl)amino]phenyl]acetate	38	318.14	-11.3796	0.57	3.38471	4.53	0.64	1111	High	EC50	Neutral_Organics	days_weeks	0.356582	-0.596263	-1.16944	0.686858	4.0743	0.745714
15307-86-5	15307865	Diclofenac	32	296.15	-5.087	4.02	1.2141	4.31	0.63	1111	High	EC50	Neutral_Organics	days_weeks	-0.455907	0.525523	-0.0868514	0.50852	3.63228	0.726665
15687-27-1	15687271	Ibuprofen	46	206.29	-1.60566	3.79	1.43949	4.31	0.73	1111	High	EC50	Neutral_Organics	days	-0.371541	0.450737	0.51208	-0.22024	4.02074	0.803539
1689-84-5	1689845	Bromoxynil	29	276.93	-7.32606	3.39	2.11394	3.47	0.87	1111	High	EC50	Phenols	weeks	-0.119084	0.320675	-0.472059	0.352647	2.79591	0.69422
1689-99-2	1689992	Bromoxynil octanoate	65	403.12	-5.31876	5.4	-1.09691	2.55	0.8	1111	High	EC50	Esters	days_weeks	-1.32095	0.974237	-0.126723	1.37604	1.85615	1.08312
16984-48-8	16984488	fluoride	11	38	8.30535	0.22	0.227887	5.04	0.45	1111	High	EC50	Inorganic_Compound	days	-0.825061	-0.710068	2.21717	-1.58506	3.6131	0.95979
17109-49-8	17109498	Edifenfos	12	310.37	-6.56864	3.48	1.74819	2.84	1.51	1111	High	EC50	Esters	days	-0.255991	0.349939	-0.341752	0.623844	2.85577	1.07926
1763-23-1	1763231	perfluoroctaansulfonaat (PFOS)	34	500.13	-2.19382	4.49	-0.983384	4.36	0.67	1111	High	EC50	Neutral_Organics	months	-1.27846	0.678346	0.410892	2.16279	2.94429	0.740943
18181-70-9	18181709	Jodofenfos	19	413	-6.08355	5.51	-1	2.15	0.64	1111	High	EC50	Esters	days_weeks	-1.28468	1.01	-0.258297	1.45617	1.85816	1.07706
1836-75-5	1836755	2,4-Dichlorophenyl 4-nitrophenyl ether	14	284.1	-5.09691	4.64	0	3.34	0.52	1111	High	EC50	Neutral_Organics	weeks	-0.910362	0.727119	-0.088556	0.410795	2.87413	0.870811
1836-77-7	1836777	1,3,5-Trichloro-2-(4-nitrophenoxy)benzene	16	318.55	-5.73283	4.97	-0.116907	3.42	1.11	1111	High	EC50	Neutral_Organics	weeks	-0.954122	0.834421	-0.19796	0.690183	2.81721	0.86976
1861-32-1	1861321	2,3,5,6-Tetrachloro-1,4-benzenedicarboxylic acid, 1-4-Dimethyl ester	29	331.97	-5.60206	4.28	-0.30103	4.09	0.76	1111	High	EC50	Esters	weeks	-1.02304	0.610063	-0.175462	0.799019	1.68057	1.16351
1897-45-6	1897456	chloorthalonil	178	265.92	-6.24413	3.05	-0.091515	2.01	0.74	1111	High	EC50	Neutral_Organics	weeks_months	-0.944617	0.210122	-0.285923	0.263356	2.55891	1.01775
1918-00-9	1918009	Dicamba	44	221.04	-4.47108	2.21	3.9196	4.43	0.86	1111	High	EC50	Neutral_Organics	days_weeks	0.556798	-0.0630084	0.0191113	-0.100618	4.44529	0.616601
1929-73-3	1929733	2-(2,4-Dichlorophenoxy)acetic acid, 2-Butoxyethyl ester	53	321.2	-5.34679	4.1	1.07918	3.25	0.5	1111	High	EC50	Esters	days_weeks	-0.50641	0.551535	-0.131545	0.711674	2.49176	0.991767
2008-39-1	2008391	(2,4-Dichlorophenoxy)acetic acid, compd. with N-methylmethanamine (1:1)	55	266.13	-9	0.65	5.87506	5.18	0.5	1111	High	EC50	Neutral_Organics	weeks	1.28875	-0.570251	-0.760044	0.265059	4.46722	0.661568
206-44-0	206440	Fluoranthene	36	202.26	-5.03527	5.16	-0.585027	2.13	1.02	1111	High	EC50	Neutral_Organics	weeks	-1.12935	0.8962	-0.0779513	-0.252923	2.70388	0.888976
2104-64-5	2104645	P-Phenylphosphonothioic acid O-ethyl O-(4-nitrophenyl) ester	75	323.31	-6.02228	4.78	0.49276	1.91	1.14	1111	High	EC50	Esters	days_weeks	-0.725915	0.772641	-0.247756	0.728786	2.29573	1.00818
21609-90-5	21609905	Leptophos	15	412.07	-7.63827	6.31	-1.52288	2.91	1.89	1111	High	EC50	Esters	weeks	-1.4804	1.27013	-0.525772	1.44863	1.24726	1.17905
2163-80-6	2163806	Monosodium methanearsonate	34	161.95	-7.12494	-3.1	5.76343	4.99	0.55	1111	High	EC50	Neutral_Organics	days_weeks	1.24697	-1.78958	-0.437458	-0.579836	4.92555	0.703827
2164-07-0	2164070	7-Oxabicyclo(2.2.1)heptane-2,3-dicarboxylic acid, Dipotassium salt	37	262.35	-8.97881	0.32	4.03181	5.19	0.44	1111	High	EC50	Neutral_Organics	hours_days	0.5988	-0.677552	-0.756399	0.234404	4.80384	0.661242
22224-92-6	22224926	Fenamiphos	37	303.36	-6	3.23	2.5172	1.73	0.97	1111	High	EC50	Esters	days_weeks	0.0318588	0.26865	-0.243924	0.566993	2.89094	0.93514
22431-62-5	22431625	(1R-trans)-3-(Cyclopentylidenemethyl)-2,2-dimethyl-cyclopropanecarboxylic acid, (5-Phenylmethyl)-3-furanyl)methyl ester	16	364.49	-7.4908	7.97	-3.10646	-0.65	0.72	1111	High	EC50	Esters	days_weeks	-2.07315	1.80989	-0.500401	1.06275	1.18748	1.13
2310-17-0	2310170	Phosalone	27	367.81	-6.93554	4.38	0.4843	2.54	1.11	1111	High	EC50	Esters	days	-0.729082	0.642579	-0.404875	1.08968	2.47299	1.12915
2312-35-8	2312358	propargite	32	350.48	-7.27311	4.72	-1.06015	3.64	1.44	1111	High	EC50	Neutral_Organics	days_weeks	-1.30719	0.753132	-0.46295	0.949134	2.89941	0.85741
2385-85-5	2385855	1,1a,2,2,3,3a,4,5,5,5a,5b,6-Dodecachlorooctahydro-1,3,4-metheno-1H-cyclobuta[cd]pentalene	20	545.55	-6.09691	6.89	-1.07058	3.55	1.22	1111	High	EC50	Neutral_Organics	recalcitrant	-1.31109	1.45872	-0.260596	2.53114	2.51745	0.894686
24307-26-4	24307264	Mepiquat chloride	17	149.67	-6.43063	-2.82	5.69897	5.42	0.74	1111	High	EC50	Neutral_Organics	days_weeks	1.22284	-1.69854	-0.318009	-0.679426	4.92796	0.694226
25155-30-0	25155300	Dodecylbenzenesulfonic acid, Sodium salt	29	348.48	-14.6402	1.96	2.90309	3.78	0.68	1111	High	EC50	Neutral_Organics	days_weeks	0.176304	-0.144297	-1.73038	0.932914	3.81848	0.74367
25311-71-1	25311711	Isofenphos	34	345.4	-5.52288	4.12	1.34439	2.3	1.38	1111	High	EC50	Esters	days_weeks	-0.407138	0.558039	-0.16184	0.907935	2.56233	0.975153
25812-30-0	25812300	Gemfibrozil	22	250.34	-4.5157	4.77	0.695832	4.54	0.67	1111	High	EC50	Neutral_Organics	days_weeks	-0.649903	0.76939	0.0114354	0.137003	3.49655	0.729669
260-94-6	260946	Acridine	27	179.22	-3.86967	3.4	1.58433	3.02	0.56	1111	High	EC50	Neutral_Organics	days_weeks	-0.317325	0.323927	0.122579	-0.439777	3.78341	0.718967
26628-22-8	26628228	Sodium azide	24	65.01	-21.7496	0.16	4.56443	3.64	0.65	1111	High	EC50	Inorganic_Compound	days	0.798166	-0.729577	-2.95348	-1.36601	3.87366	0.84527
2691-41-0	2691410	Octahydro-1,3,5,7-tetranitro-1,3,5,7-tetrazocine	12	296.16	-5.49315	0.82	6	4.48	0.1	1111	High	EC50	Neutral_Organics	days_weeks	1.33552	-0.514974	-0.156726	0.508601	5.02113	0.539789
2764-72-9	2764729	Diquat	39	184.24	-8	2.36	1.8451	3.5	1.22	1111	High	EC50	Neutral_Organics	days_weeks	-0.219717	-0.0142351	-0.588004	-0.399065	3.72949	0.761456
2809-21-4	2809214	etidronic acid	32	206.03	-7.78175	-0.01	6	5.64	0.62	1111	High	EC50	Neutral_Organics	days_weeks	1.33552	-0.784853	-0.550456	-0.222349	4.95128	0.581589
28553-12-0	28553120	Diisononylphthalate	11	418.62	-4.51344	9.37	-2.5683	2.74	0.65	1111	High	EC50	Esters	days_weeks	-1.87171	2.2651	0.0118239	1.50175	1.43144	1.03001
2921-88-2	2921882	Chlorpyrifos	572	350.59	-4.6925	4.96	0.049218	1.05	1.4	1111	High	EC50	Esters	days_weeks	-0.891939	0.831169	-0.018982	0.950026	2.21041	1.02286
29232-93-7	29232937	Pirimiphos-Methyl	46	305.34	-4.82391	4.2	0.934498	1.9	1.47	1111	High	EC50	Esters	days_weeks	-0.560566	0.584051	-0.0415889	0.583051	2.46659	0.994608
298-00-0	298000	Parathion-Methyl	206	263.21	-5.45593	2.86	1.57634	2.95	1.4	1111	High	EC50	Esters	days	-0.320316	0.148343	-0.150322	0.241378	2.84707	1.10651
298-02-2	298022	Phorate	55	260.38	-3.19518	3.56	1.69897	1.19	1.15	1111	High	EC50	Esters	days	-0.274414	0.375951	0.238618	0.218427	2.95225	1.06173
298-04-4	298044	Disulfoton	73	274.4	-4.011	4.02	1.21219	2.58	1.18	1111	High	EC50	Esters	days	-0.456624	0.525523	0.0982649	0.332129	2.78182	1.08044
299-84-3	299843	Fenchlorphos	18	321.55	-4.12494	4.88	0	2.39	0.82	1111	High	EC50	Esters	days_weeks	-0.910362	0.805157	0.0786621	0.714513	2.21546	1.02585
300-76-5	300765	Naled	63	380.8	-3.69897	1.38	0.176091	2.2	1.29	1111	High	EC50	Esters	days_weeks	-0.844448	-0.332887	0.151946	1.19503	2.30393	1.13782
301-12-2	301122	Oxydemeton-methyl	33	246.28	-4.54516	-0.74	6	3.26	1	1111	High	EC50	Esters	days	1.33552	-1.02222	0.00636796	0.104077	4.17753	0.950002
302-01-2	302012	Hydrazine	42	32.05	1.15836	-2.07	6	2.83	0.66	1111	High	EC50	Inorganic_Compound	days	1.33552	-1.45467	0.987602	-1.63332	5.05807	0.713285
30560-19-1	30560191	Acephate	111	183.17	-5.76955	-0.85	5.91275	5.07	0.89	1111	High	EC50	Esters	days	1.30286	-1.05798	-0.204277	-0.407742	4.11274	0.965934
33089-61-1	33089611	Amitraz	33	293.42	-5.69897	5.5	0	3.41	0.98	1111	High	EC50	Aliphatic_Amines	weeks	-0.910362	1.00675	-0.192135	0.48638	2.54835	0.828995
333-41-5	333415	Diazinon	237	304.35	-4.04528	3.81	1.60206	2.34	1.65	1111	High	EC50	Esters	days_weeks	-0.310689	0.45724	0.0923674	0.575022	2.68747	0.962118
3380-34-5	3380345	Triclosan	80	289.55	-3.20772	4.66	0.471688	2.05	1.03	1111	High	EC50	Phenols	weeks	-0.733803	0.733622	0.236461	0.454994	2.44935	0.731206
3383-96-8	3383968	Temephos | Temefos	237	466.47	-7.10182	5.96	-0.568636	1.75	1.58	1111	High	EC50	Esters	days	-1.12321	1.15632	-0.433482	1.88981	2.15309	1.14023
34128-01-3	34128013	(Carboxymethoxy)butanedioic acid, Trisodium salt	13	258.07	-8.84164	-6.44	6	6.32	0.55	1111	High	EC50	Neutral_Organics	hours_days	1.33552	-2.8756	-0.7328	0.199693	5.42178	0.777805
35400-43-2	35400432	O-Ethyl O-[4-(methylthio)phenyl]S-propyl ester, Phosphorodithioic acid	23	322.44	-5.92082	5.48	-0.508638	3.51	1.32	1111	High	EC50	Esters	days	-1.10075	1.00025	-0.230301	0.721731	2.21258	1.14739
3653-48-3	3653483	(4-Chloro-2-methylphenoxy)acetic acid, Sodium salt	15	222.6	-10.1397	-1.29	5.43136	5.29	0.51	1111	High	EC50	Neutral_Organics	days	1.12267	-1.20105	-0.956112	-0.087967	4.92526	0.777243
38641-94-0	38641940	N-(Phosphonomethyl)glycine compd. with 2-propanamine (1:1)	204	169.07	-7.80134	-5.4	6.02119	4.42	0.74	1111	High	EC50	Aliphatic_Amines	days	1.34345	-2.53744	-0.553827	-0.522093	4.90013	0.860539
39515-41-8	39515418	Fenpropathrin	37	349.43	-5.26122	6	-1.85078	0.69	1.16	1111	High	EC50	Esters	days_weeks	-1.60313	1.16933	-0.116824	0.940618	1.63652	1.10915
40596-69-8	40596698	(2E,4E)-11-Methoxy-3,7,11-trimethyl-2,4-dodecadienoic acid 1-methylethyl ester	53	310.48	-4.62709	5.5	0.146128	3.29	1.52	1111	High	EC50	Esters	days_weeks	-0.855664	1.00675	-0.00772778	0.624736	2.23687	0.99702
41198-08-7	41198087	Phosphorothioic acid O-(4-bromo-2-chlorophenyl) O-ethyl S-propyl ester	91	373.64	-2.99379	4.82	-0.389787	1.55	1.09	1111	High	EC50	Esters	days_weeks	-1.05626	0.785647	0.273266	1.13696	2.14071	1.04677
420-04-2	420042	Cyanamide	25	42.043	3.27096	-0.81	5.39445	3.96	0.73	1111	High	EC50	Neutral_Organics	days	1.10885	-1.04498	1.35105	-1.55228	5.35349	0.69168
42874-03-3	42874033	Oxyfluorfen	22	361.7	-6.69897	4.73	-0.935542	2.48	1.51	1111	High	EC50	Neutral_Organics	weeks	-1.26055	0.756383	-0.364175	1.04013	2.55082	0.935391
4685-14-7	4685147	Paraquat	45	186.26	-3.60555	-4.22	6	3.86	1.08	1111	High	EC50	Neutral_Organics	days_weeks	1.33552	-2.15376	0.168018	-0.382683	5.11739	0.710382
470-90-6	470906	Chlorfenvinphos	36	359.57	-5.12494	3.81	2.09342	2.12	1.52	1111	High	EC50	Esters	days_weeks	-0.126766	0.45724	-0.0933781	1.02285	2.79362	0.936636
50-29-3	50293	1,1'-(2,2,2-Trichloroethylidene)bis(4-chlorobenzene)	322	354.49	-6.79588	6.91	-2.25964	1.4	1.09	1111	High	EC50	Neutral_Organics	weeks_months	-1.75617	1.46522	-0.380847	0.981655	1.8892	1.01995
50-65-7	50657	Niklosamid	20	327.13	-10.8268	4.56	0.20412	2.11	0.9	1111	High	EC50	Phenols	weeks	-0.833957	0.701107	-1.07433	0.759766	2.12165	0.791938
5064-31-3	5064313	Nitrilotriacetic acid, Trisodium salt	37	257.09	-9.09259	-10.08	6	6.26	0.66	1111	High	EC50	Aliphatic_Amines	hours_days	1.33552	-4.05917	-0.775973	0.191745	5.13796	0.895339
51630-58-1	51630581	Fenvalerate	217	419.91	-8.82391	6.22	-2.69897	0.64	1.2	1111	High	EC50	Esters	days_weeks	-1.92062	1.24086	-0.72975	1.51221	1.2729	1.17387
52-68-6	52686	Trichlorfon	168	257.44	-5.10791	0.51	5.07918	2.86	1.41	1111	High	EC50	Esters	weeks	0.990845	-0.615773	-0.0904477	0.194584	3.27439	0.954596
52315-07-8	52315078	Cypermethrin | Zeta-cypermethrin	186	416.31	-2.88606	6.94	-0.939302	-0.11	1.19	1111	High	EC50	Esters	weeks	-1.26196	1.47498	0.2918	1.48301	1.56802	1.0944
52341-33-0	52341330	FMC-35171	16	391.3	-7.66154	6.5	-2.22185	0.23	0.83	1111	High	EC50	Esters	weeks	-1.74203	1.33191	-0.529776	1.28018	1.04357	1.21671
52645-53-1	52645531	Permethrin	314	391.29	-7.66154	6.5	-2.22185	1.08	1.26	1111	High	EC50	Esters	weeks	-1.74203	1.33191	-0.529776	1.2801	1.04357	1.21671
52918-63-5	52918635	Deltamethrin	177	505.22	-7.82391	6.2	-2.69897	0.29	1.59	1111	High	EC50	Esters	days_weeks	-1.92062	1.23436	-0.557709	2.20407	1.306	1.16931
53112-28-0	53112280	Pyrimethanil	19	199.26	-4.78252	2.84	2.08279	3.78	0.41	1111	High	EC50	Neutral_Organics	days_weeks	-0.130747	0.14184	-0.0344677	-0.277253	3.90089	0.712215
532-32-1	532321	Benzoic acid, Sodium salt	13	144.11	-8.43533	-2.27	5.74507	5.13	0.48	1111	High	EC50	Neutral_Organics	days_weeks	1.2401	-1.5197	-0.662899	-0.724517	4.87146	0.682168
53469-21-9	53469219	Aroclor 1242	23	291.99	-4.06399	6.29	-0.55752	1.9	1.11	1111	High	EC50	Neutral_Organics	weeks	-1.11905	1.26363	0.0891478	0.474783	2.73621	0.84163
541-73-1	541731	1,3-Dichlorobenzene	39	147	2.25516	3.28	2.07449	4.25	0.54	1111	High	EC50	Neutral_Organics	days_weeks	-0.133853	0.284908	1.1763	-0.701079	4.12754	0.659872
54910-89-3	54910893	Fluoxetin	12	309.33	-4.5986	3.82	1.78017	3.78	1.39	1111	High	EC50	Aliphatic_Amines	days_weeks	-0.244019	0.460492	-0.00282661	0.615409	3.51291	0.681156
55-38-9	55389	Fenthion	192	278.33	-4.97881	4.09	0.875061	1.82	1.35	1111	High	EC50	Esters	days	-0.582815	0.548284	-0.0682382	0.364001	2.65219	1.10443
55-63-0	55630	Nitroglycerin	20	227.09	0.559399	1.51	4.41382	3.83	0.9	1111	High	EC50	Neutral_Organics	days_weeks	0.741791	-0.290617	0.884556	-0.0515533	4.75843	0.583796
5598-13-0	5598130	Chlorpyrifos-Methyl	32	322.54	-4.37675	4.31	0.677607	1.42	1.59	1111	High	EC50	Esters	days_weeks	-0.656724	0.619818	0.0353403	0.722542	2.40648	1.00461
56-23-5	56235	Tetrachloromethane	42	153.82	4.12265	2.44	2.58936	4.47	0.85	1111	High	EC50	Neutral_Organics	weeks	0.0588699	0.0117774	1.49758	-0.64577	3.9399	0.736722
56-38-2	56382	Parathion-ethyl	194	291.26	-5.17522	3.83	1.04139	1.67	1.49	1111	High	EC50	Esters	days	-0.520554	0.463743	-0.102029	0.468862	2.69545	1.10422
56-72-4	56724	Coumaphos	46	362.77	-7.01323	4.13	0.176091	2.28	1.83	1111	High	EC50	Esters	days	-0.844448	0.56129	-0.41824	1.04881	2.38321	1.15807
56073-10-0	56073100	Brodifocaum	22	523.43	-17.9547	8.5	-2.42022	2.71	0.76	1111	High	EC50	Esters	weeks	-1.81628	1.98222	-2.30061	2.35175	0.633499	1.21192
56296-78-7	56296787	N-Methyl-gamma-[4-(trifluoromethyl)phenoxy]benzenepropanamine, Hydrochloride (1:1)	36	309.33	-4.5986	3.82	1.78017	2.64	0.77	1111	High	EC50	Aliphatic_Amines	days_weeks	-0.244019	0.460492	-0.00282661	0.615409	3.51291	0.681156
563-12-2	563122	Ethion	47	384.48	-5.82391	5.07	0.30103	1.96	1.31	1111	High	EC50	Esters	days	-0.797682	0.866936	-0.213629	1.22487	2.45211	1.1102
56392-17-7	56392177	Metoprolol	18	267.37	-6.54061	1.88	4.22789	4.67	0.56	1111	High	EC50	Aliphatic_Amines	days_weeks	0.672194	-0.17031	-0.33693	0.275116	4.1681	0.605592
569-64-2	569642	N-[4-[[4-(Dimethylamino)phenyl]phenylmethylene]-2,5-cyclohexadien-1-ylidene]-N-methylmethanaminium chloride	42	364.92	-12.6108	0.62	4.60206	2.6	0.68	1111	High	EC50	Neutral_Organics	weeks	0.812252	-0.580006	-1.38125	1.06624	3.98115	0.76245
57-09-0	57090	Cetyl trimethyl ammonium bromide	22	364.46	-10.3958	3.18	5	2.1	0.8	1111	High	EC50	Neutral_Organics	days_weeks	0.961206	0.252392	-1.00017	1.06251	4.55509	0.544544
57-13-6	57136	Urea	32	60.058	1.44289	-1.56	5.62428	6.56	0.97	1111	High	EC50	Neutral_Organics	days	1.19488	-1.28884	1.03655	-1.40617	5.36459	0.713604
57213-69-1	57213691	((3,5,6-Trichloro-2-pyridinyl)oxy)-acetic acid, Cmpd. with N,N-Diethylethanamine	37	355.67	-10.6234	1.5	2.47582	5.49	0.42	1111	High	EC50	Neutral_Organics	weeks	0.0163699	-0.293869	-1.03934	0.991225	3.42735	0.855351
57837-19-1	57837191	Metalaxyl	48	279.34	-4.60555	1.71	4.41497	4.93	0.8	1111	High	EC50	Esters	days_weeks	0.742223	-0.225586	-0.00402209	0.372192	3.49464	0.861829
58-89-9	58899	Lindane	303	290.83	-4.45346	4.14	0.90309	2.07	1.05	1111	High	EC50	Neutral_Organics	weeks	-0.572323	0.564542	0.0221437	0.465375	3.15924	0.828031
58-90-2	58902	2,3,4,6-Tetrachlorophenol	28	231.89	-3.17653	4.45	1.36173	2.88	0.42	1111	High	EC50	Phenols	weeks	-0.400649	0.66534	0.241827	-0.0126255	2.70855	0.682094
584-79-2	584792	Allethrin	28	302.42	5.51851	4.78	0.662758	1.3	0.55	1111	High	EC50	Esters	days_weeks	-0.662283	0.772641	1.73772	0.55937	2.72525	0.936539
59-50-7	59507	4-chloro-3-methylphenol	38	142.59	0.137667	2.7	3.02354	3.79	0.45	1111	High	EC50	Phenols	days_weeks	0.221391	0.0963178	0.812002	-0.736844	3.71243	0.5326
591-35-5	591355	3,5-Dichlorophenol	23	163	-2.07469	3.62	3.73078	3.47	0.35	1111	High	EC50	Phenols	days_weeks	0.486121	0.395461	0.431388	-0.57132	3.8373	0.466435
608-73-1	608731	1,2,3,4,5,6-Hexachlorocyclohexane	29	290.83	-4.45346	4.14	0.90309	2.27	1.35	1111	High	EC50	Neutral_Organics	weeks	-0.572323	0.564542	0.0221437	0.465375	3.15924	0.828031
608-93-5	608935	1,2,3,4,5-Pentachlorobenzene	20	250.34	-2.99568	5.17	-0.080399	2.99	0.71	1111	High	EC50	Neutral_Organics	weeks_months	-0.940456	0.899452	0.27294	0.137003	2.65489	0.923975
61-73-4	61734	7-(Dimethylamino)-3-(methylimino)-3H-phenothiazine, 3-Methochloride	12	319.85	-6.1549	0.75	4.63949	4.5	0.74	1111	High	EC50	Neutral_Organics	weeks	0.826261	-0.537735	-0.270573	0.700726	4.20391	0.721378
61791-26-2	61791262	Tallow alkyl amines, Ethoxylated	21	487.77	-13.2815	5.89	-1.08863	3.33	0.44	1111	High	EC50	Aliphatic_Amines	days_weeks	-1.31785	1.13356	-1.49663	2.06255	2.38509	0.834802
61791-64-8	61791648	Alkyl* amino)-3-aminopropane monoacetate	23	530.88	-19.7799	12.17	-7.73283	3.3	1.13	1111	High	EC50	Neutral_Organics	days_weeks	-3.80486	3.17554	-2.61462	2.41217	0.511867	1.07984
62-73-7	62737	Dichlorvos	186	220.98	-1.80134	1.43	3.90309	2.52	1.45	1111	High	EC50	Esters	days	0.550618	-0.31663	0.478414	-0.101105	3.64842	0.990842
624-92-0	624920	Dimethyl disulfide	46	94.198	3.514	1.87	3.71071	3.65	0.58	1111	High	EC50	Neutral_Organics	days_weeks	0.478607	-0.173561	1.39287	-1.1293	4.65057	0.599931
62476-59-9	62476599	Acifluorfen, Sodium salt	25	383.64	-8.011	0.37	5.39794	4.8	0.62	1111	High	EC50	Neutral_Organics	weeks	1.11016	-0.661294	-0.589896	1.21806	4.36408	0.696656
64-17-5	64175	Ethanol	173	46.069	3.90945	-0.14	5.79657	6.36	0.74	1111	High	EC50	Neutral_Organics	days	1.25937	-0.827124	1.4609	-1.51963	5.48602	0.638799
640-15-3	640153	Thiometon	18	246.35	-4.76955	3.15	2.30103	3.86	0.36	1111	High	EC50	Esters	days	-0.049055	0.242638	-0.0322372	0.104644	3.07679	1.04652
64700-56-7	64700567	[3,5,6-Trichloro-2-pyridinyloxy]acetic acid, 2-Butoxyethyl ester	46	356.64	-6.10127	4.01	6	3.05	0.36	1111	High	EC50	Esters	days_weeks	1.33552	0.522271	-0.261347	0.999091	3.88705	0.686759
65-85-0	65850	Benzoic acid	28	122.12	-0.400954	1.87	3.54145	4.96	0.66	1111	High	EC50	Neutral_Organics	days_weeks	0.415253	-0.173561	0.719337	-0.902855	4.47268	0.631312
654-66-0	654660	alpha,alpha,alpha-Trifluoro-4-nitro-m-cresol, Sodium salt	41	229.09	-9.50307	-0.39	4.43361	3.65	0.58	1111	High	EC50	Phenols	weeks	0.749199	-0.908413	-0.846593	-0.0353334	3.41883	0.693932
66230-04-4	66230044	Esfenvalerate	50	419.91	-8.82391	6.22	-2.69897	0.03	1.33	1111	High	EC50	Esters	days_weeks	-1.92062	1.24086	-0.72975	1.51221	1.2729	1.17387
66441-23-4	66441234	Fenoxaprop-ethyl	42	361.78	-7.52288	4.58	-0.0457575	3.07	0.65	1111	High	EC50	Esters	days_weeks	-0.927489	0.70761	-0.50592	1.04078	2.09226	1.05742
67-56-1	67561	Methanol	60	32.042	4.20038	-0.63	5.90472	6.29	0.89	1111	High	EC50	Neutral_Organics	days	1.29985	-0.98645	1.51095	-1.63338	5.53011	0.647957
67-63-0	67630	2-Propanol	23	60.096	3.82031	0.28	5.55388	6.65	0.42	1111	High	EC50	Neutral_Organics	days	1.16853	-0.690558	1.44556	-1.40587	5.41023	0.639621
67-64-1	67641	Acetone	84	58.08	4.52103	-0.24	5.11059	6.6	0.86	1111	High	EC50	Neutral_Organics	days_weeks	1.0026	-0.859639	1.56612	-1.42222	5.10186	0.581389
67-66-3	67663	Trichloromethane	61	119.38	4.40129	1.52	3.82086	4.84	0.58	1111	High	EC50	Neutral_Organics	days_weeks	0.519837	-0.287366	1.54552	-0.925076	4.71397	0.600802
67-68-5	67685	Dimethylsulfoxide	52	78.133	2.4193	1.17	5.75511	7.53	0.52	1111	High	EC50	Neutral_Organics	days_weeks	1.24386	-0.40117	1.20453	-1.25959	5.20898	0.501068
67-72-1	67721	Hexachloroethane	35	236.74	-0.677781	4.14	1.69897	3.51	0.43	1111	High	EC50	Neutral_Organics	weeks_months	-0.274414	0.564542	0.671712	0.0267078	3.25157	0.835755
68359-37-5	68359375	Beta-Cyfluthrin; Cyfluthrin	54	434.3	-9.82391	5.95	-2.52288	0.3	1.15	1111	High	EC50	Esters	weeks	-1.85471	1.15307	-0.90179	1.62891	0.889153	1.26691
68424-85-1	68424851	Hyamine 3500 (N-alkyl dimethylbenzyl ammonium chloride)	53	368.05	-11.4522	3.91	4	2.84	0.61	1111	High	EC50	Neutral_Organics	days_weeks	0.586893	0.489756	-1.18193	1.09163	4.22685	0.587411
68951-67-7	68951677	C14-15 Alcohols, Ethoxylated	21	242.45	-2.33161	6.94	-1.51329	3.17	0.34	1111	High	EC50	Neutral_Organics	days	-1.47681	1.47498	0.387186	0.0730156	3.12372	0.88187
6923-22-4	6923224	Monocrotophos	43	223.17	-5.66154	0	6	3.63	1.06	1111	High	EC50	Esters	days	1.33552	-0.781602	-0.185696	-0.0833443	4.13573	0.92938
69327-76-0	69327760	2-[(1,1-Dimethylethyl)imino]tetrahydro-3-(1-methylethyl)-5-phenyl-4H-1,3,5-thiadiazin-4-one	20	305.44	-5.02687	0	-0.0457575	3.19	0.8	1111	High	EC50	Neutral_Organics	days_weeks	-0.927489	-0.781602	-0.0765067	0.583862	3.29797	0.95029
69806-50-4	69806504	Fluazifop-butyl	23	383.37	-6.60555	4.5	0.30103	3.48	1.12	1111	High	EC50	Esters	days_weeks	-0.797682	0.681598	-0.348102	1.21587	2.22308	1.03345
70124-77-5	70124775	Flucythrinate	34	451.47	-8.06048	6.2	-1.22185	-0.04	0.77	1111	High	EC50	Esters	days_weeks	-1.36772	1.23436	-0.598409	1.76816	1.72432	1.07684
71-23-8	71238	1-Propanol	38	60.096	3.49032	0.35	5.22011	6.54	0.26	1111	High	EC50	Neutral_Organics	days	1.0436	-0.667798	1.38879	-1.40587	5.30259	0.660031
71-41-0	71410	1-Pentanol	14	88.15	2.54808	1.33	4.4706	5.65	0.14	1111	High	EC50	Neutral_Organics	days	0.763045	-0.349145	1.22669	-1.17835	5.0487	0.677446
71-43-2	71432	Benzene	147	78.114	4.06535	1.99	3.03874	4.88	0.84	1111	High	EC50	Neutral_Organics	days_weeks	0.22708	-0.134543	1.48772	-1.25974	4.47409	0.63536
71-55-6	71556	1,1,1-trichloroethane	44	133.41	4.17405	2.68	3.35725	4.99	0.61	1111	High	EC50	Neutral_Organics	weeks	0.346302	0.0898147	1.50642	-0.811294	4.1615	0.679133
7173-51-5	7173515	N-Decyl-N,N-dimethyl-1-decanaminium chloride	41	362.09	-10.6326	4.66	-0.259243	2.42	0.67	1111	High	EC50	Neutral_Organics	days	-1.0074	0.733622	-1.04092	1.04329	3.22722	0.927749
72-43-5	72435	1,1'-(2,2,2-Trichloroethylidene)bis[4-methoxybenzene]	128	345.66	-4.37986	5.08	-1	1.35	0.81	1111	High	EC50	Neutral_Organics	weeks	-1.28468	0.870188	0.0348047	0.910044	2.60632	0.914715
72-54-8	72548	1,1'-(2,2-Dichloroethylidene)bis[4-chlorobenzene]	31	320.05	-5.86967	6.02	-1.04576	1.29	1.22	1111	High	EC50	Neutral_Organics	weeks	-1.3018	1.17583	-0.221501	0.702348	2.53765	0.8918
732-11-6	732116	Phosmet	74	317.32	-6.3098	2.78	1.38739	2.67	1.35	1111	High	EC50	Esters	days	-0.391043	0.12233	-0.297223	0.680208	2.76495	1.12587
74-90-8	74908	Hydrogen cyanide	22	27.027	4.99582	-0.69	4.53461	2.72	0.89	1111	High	EC50	Neutral_Organics	days	0.787004	-1.00596	1.6478	-1.67405	5.1615	0.732841
74223-64-6	74223646	Metsulfuron-methyl	19	381.37	-10.5436	2.2	3.97772	3.64	1.81	1111	High	EC50	Esters	days_weeks	0.578554	-0.0662599	-1.02561	1.19965	3.16943	0.903328
7447-40-7	7447407	Potassium chloride (KCl)	60	74.55	-15.7825	-0.46	5.5193	5.8	0.73	1111	High	EC50	Inorganic_Compound	days	1.15559	-0.931173	-1.92691	-1.28865	4.35003	0.775434
75-05-8	75058	Acetonitrile	32	41.054	4.42586	-0.15	5.25042	5.66	0.72	1111	High	EC50	Neutral_Organics	days_weeks	1.05494	-0.830375	1.54974	-1.5603	5.13845	0.569795
75-09-2	75092	Dichloromethane	34	84.933	4.76031	1.34	4.24625	5.4	0.57	1111	High	EC50	Neutral_Organics	days_weeks	0.679068	-0.345894	1.60728	-1.20444	4.84973	0.578367
7631-99-4	7631994	Nitric acid, Sodium salt	33	84.99	-16.7959	-0.79	5.86332	6.16	0.5	1111	High	EC50	Inorganic_Compound	days	1.28436	-1.03847	-2.10125	-1.20398	4.41809	0.770771
7647-14-5	7647145	Sodium chloride (NaCl)	176	58.44	-22.8069	-0.46	5.55267	6.38	0.43	1111	High	EC50	Inorganic_Compound	days	1.16808	-0.931173	-3.13538	-1.4193	4.12808	0.810354
7647-15-6	7647156	Sodium bromide (NaBr)	35	102.89	-16.4461	-0.37	5.37639	6.49	0.77	1111	High	EC50	Inorganic_Compound	days_weeks	1.1021	-0.901909	-2.04108	-1.05881	4.07921	0.683485
76578-14-8	76578148	Quizalofop-ethyl	31	372.81	-8.18776	4.28	-0.39794	3.18	0.59	1111	High	EC50	Esters	days_weeks	-1.05932	0.610063	-0.620306	1.13023	1.97077	1.09402
7664-41-7	7664417	Ammonia	69	17.03	-12.7799	-1.38	6	3.95	1.04	1111	High	EC50	Inorganic_Compound	days	1.33552	-1.23032	-1.41034	-1.75513	4.5939	0.76206
7681-49-4	7681494	Sodium fluoride (NaF)	59	41.99	-25.2652	-0.77	4.62531	5.14	0.49	1111	High	EC50	Inorganic_Compound	days	0.820956	-1.03197	-3.55831	-1.55271	3.7816	0.893259
7681-52-9	7681529	Hypochlorous acid, Sodium salt	185	74.44	-12.9872	-3.42	6	2.74	0.93	1111	High	EC50	Inorganic_Compound	days	1.33552	-1.89363	-1.446	-1.28954	4.60084	0.836231
77-73-6	77736	3a,4,7,7a-Tetrahydro-4,7-methano-1H-indene	36	132.21	2.34231	3.16	2.95883	4.07	0.43	1111	High	EC50	Neutral_Organics	days_weeks	0.197167	0.245889	1.19129	-0.821026	4.38633	0.607603
7700-17-6	7700176	Crotoxyphos	24	314.28	-4.85387	3.3	3	2.09	1.08	1111	High	EC50	Esters	days	0.212579	0.291411	-0.0467437	0.655554	3.27464	0.997247
77182-82-2	77182822	Glufosinate-ammonium	37	198.16	-11.0395	-5.34	6.13672	4.98	0.89	1111	High	EC50	Aliphatic_Amines	days_weeks	1.3867	-2.51793	-1.11093	-0.286174	4.61919	0.766843
7723-14-0	7723140	Elemental phosphorus Red	17	34	4.46687	-0.27	0.518514	2.13	1.27	1111	High	EC50	Inorganic_Compound	days	-0.716275	-0.869394	1.5568	-1.6175	3.5737	0.979143
7745-89-3	7745893	3-Chloro-4-methylbenzenamine hydrochloride	15	178.06	-6.43771	-1.42	5.95875	3.95	0.64	1111	High	EC50	Neutral_Organics	days_weeks	1.32008	-1.24332	-0.319227	-0.449184	4.99322	0.627629
7757-82-6	7757826	Sodium sulfate	97	142.04	-18.757	-4.38	6	6.55	0.51	1111	High	EC50	Inorganic_Compound	days_weeks	1.33552	-2.20578	-2.43863	-0.741305	4.21	0.799753
7778-39-4	7778394	Arsenic acid (H3AsO4)	32	141.94	-18.2403	-3.14	5.77085	4.01	0.66	1111	High	EC50	Neutral_Organics	days_weeks	1.24975	-1.80259	-2.34975	-0.742116	4.56152	0.763398
7778-43-0	7778430	Arsenic acid (H3AsO4), Disodium salt	21	185.91	-19.9626	-7.29	5.42651	4.11	0.91	1111	High	EC50	Neutral_Organics	days_weeks	1.12086	-3.15199	-2.64605	-0.385521	4.43342	0.94299
7782-49-2	7782492	Selenium	171	80.98	3.95999	0.24	4.91073	3.84	0.6	1111	High	EC50	Neutral_Organics	days_weeks	0.927792	-0.703565	1.4696	-1.2365	5.02246	0.579833
7782-50-5	7782505	Chlorine	116	70.91	3.76716	0.85	3.79934	2.07	1.06	1111	High	EC50	Inorganic_Compound	days_weeks	0.511783	-0.50522	1.43642	-1.31817	4.28241	0.633262
7783-20-2	7783202	Ammonium sulfate	34	132.13	-21.1785	0.48	4.54605	5.17	0.54	1111	High	EC50	Inorganic_Compound	days_weeks	0.791286	-0.625527	-2.85523	-0.821674	3.67792	0.730671
7784-46-5	7784465	Arsenenous acid, Sodium salt	67	129.91	-17.2175	-3.28	6	3.98	0.81	1111	High	EC50	Neutral_Organics	days_weeks	1.33552	-1.84811	-2.17379	-0.839679	4.66229	0.748481
7786-34-7	7786347	Mevinphos	85	224.15	-3.89279	0.13	5.77815	1.71	1.04	1111	High	EC50	Esters	days	1.25248	-0.739332	0.118601	-0.0753965	4.12917	0.929472
78-34-2	78342	Dioxathion	30	456.53	-7.0575	3.45	0.188928	2.06	1.21	1111	High	EC50	Esters	days	-0.839643	0.340184	-0.425856	1.80919	2.39004	1.18185
78-40-0	78400	Triethyl phosphate	24	182.16	1.34231	0.87	5.48572	5.58	0.56	1111	High	EC50	Esters	days	1.14302	-0.498717	1.01925	-0.415933	4.2124	0.893914
78-48-8	78488	S,S,S-tributylphosphorotrithioate	57	314.5	-5.27572	5.7	0.361728	2.28	0.99	1111	High	EC50	Esters	hours_days	-0.774962	1.07178	-0.119319	0.657338	2.73836	0.939884
78-83-1	78831	2-Methyl-1-propanol	28	74.123	3.25193	0.77	5.0086	6.04	0.42	1111	High	EC50	Neutral_Organics	days	0.964425	-0.531232	1.34778	-1.29211	5.23088	0.659662
786-19-6	786196	Carbofenthion	41	342.87	-6.52288	5.33	-0.200659	1.56	1.19	1111	High	EC50	Esters	days_weeks	-0.985471	0.951477	-0.33388	0.887417	2.07548	1.03511
79-00-5	79005	1,1,2-Trichloroethane	37	133.41	3.4387	2.01	3.69885	4.95	0.34	1111	High	EC50	Neutral_Organics	days_weeks	0.474167	-0.128039	1.37991	-0.811294	4.64373	0.596066
80-05-7	80057	Bisphenol-A	48	228.29	-4.51914	3.64	2.56562	3.6	0.45	1111	High	EC50	Phenols	days_weeks	0.049986	0.401964	0.0108429	-0.0418213	3.42046	0.552534
8001-35-2	8001352	Toxaphene	144	413.82	-5.84771	5.78	-1.53596	1.24	0.82	1111	High	EC50	Neutral_Organics	months	-1.48529	1.0978	-0.217724	1.46282	2.65571	0.749057
8003-34-7	8003347	Pyrethrum	63	328.46	-5.52578	6.15	-1.33329	1.22	0.54	1111	High	EC50	Esters	days_weeks	-1.40943	1.2181	-0.16234	0.770553	1.77607	1.07234
8022-00-2	8022002	Phosphorothioic acid, O-[2-(Ethylthio)ethyl]-O,O-dimethyl ester, Mixt. with S-(2-(Ethylthio)ethyl)-O,O-dimethyl ester ph	20	230.28	-3.52288	1.02	1.34242	2.86	1.04	1111	High	EC50	Esters	days	-0.407875	-0.449943	0.182241	-0.0256825	2.85574	1.17707
80844-07-1	80844071	Ethofenprox	45	376.5	-6.67985	7.05	-3	1.82	1.58	1111	High	EC50	Neutral_Organics	days_weeks	-2.0333	1.51074	-0.360886	1.16015	2.34363	0.893893
81-88-9	81889	Rhodamine B Basic Violet 10	12	479.02	-16.51	1.95	4.07918	4.98	0.53	1111	High	EC50	Neutral_Organics	weeks	0.616531	-0.147549	-2.05207	1.99159	3.69278	0.76854
82657-04-3	82657043	Bifenthrin	50	422.87	-6.74473	8.15	-1	0.02	1.26	1111	High	EC50	Esters	weeks	-1.28468	1.86841	-0.372047	1.53621	1.41513	1.07525
83-32-9	83329	Acenaphthene	17	154.21	-0.76458	4.15	0.719282	2.96	0.44	1111	High	EC50	Neutral_Organics	days_weeks	-0.641125	0.567793	0.656779	-0.642607	3.63116	0.730612
84-66-2	84662	Diethyl phthalate	58	222.24	-0.470336	2.65	2.72582	4.51	0.36	1111	High	EC50	Esters	days	0.10995	0.08006	0.707401	-0.0908865	3.34445	1.01481
84-74-2	84742	dibutyl phthalate	68	278.35	-1.51724	4.61	1.17176	3.17	0.5	1111	High	EC50	Esters	hours_days	-0.471758	0.717365	0.527292	0.364163	3.1033	0.90772
85-00-7	85007	6,7-Dihydrodipyrido[1,2-a:2',1'-c]pyrazinediium, Dibromide	70	344.05	-8.14448	-2.82	5.85003	3.77	1.2	1111	High	EC50	Neutral_Organics	days_weeks	1.27939	-1.69854	-0.612861	0.896987	4.91504	0.693678
85-01-8	85018	Phenanthrene	21	178.24	-3.91721	4.46	0.0606978	2.67	0.45	1111	High	EC50	Neutral_Organics	weeks	-0.887642	0.668591	0.114399	-0.447724	2.93174	0.867188
85-68-7	85687	benzyl butyl phthalate	53	312.37	-2.23172	4.84	0.356447	2.95	0.51	1111	High	EC50	Esters	days	-0.776939	0.79215	0.404372	0.640064	2.58808	1.09598
85535-84-8	85535848	C10-C13 Chlooralkanen	32	176.73	-0.364516	5.43	0.11694	3.88	1.63	1111	High	EC50	Neutral_Organics	days	-0.86659	0.983992	0.725606	-0.459971	3.66905	0.822157
86-73-7	86737	fluorene	12	166.22	-1.35666	4.02	0.610713	3.38	0.78	1111	High	EC50	Neutral_Organics	days_weeks	-0.681764	0.525523	0.554918	-0.545206	3.5812	0.745279
87-86-5	87865	Pentachlorphenol	284	266.34	-3.95861	5.12	1.14613	2.61	0.72	1111	High	EC50	Phenols	weeks_months	-0.481351	0.883194	0.107278	0.266762	2.35431	0.754024
877-43-0	877430	2,6-Dimethylquinoline	18	157.22	-2.36251	3.24	3.25527	4.13	0.53	1111	High	EC50	Neutral_Organics	days_weeks	0.308131	0.271902	0.381871	-0.618196	4.31621	0.610735
88-06-2	88062	2,4,6-Trichlorophenol	48	197.45	-2.09691	3.69	2.90309	3.42	0.53	1111	High	EC50	Phenols	weeks	0.176304	0.418222	0.427564	-0.291932	3.19393	0.605832
88-30-2	88302	4-Nitro-3-(trifluoromethyl)phenol	114	207.11	-2.83565	2.87	3.69897	3.82	0.59	1111	High	EC50	Phenols	weeks	0.474213	0.151594	0.300472	-0.21359	3.4047	0.588606
882-09-7	882097	Clofibrinsäure	15	214.65	-4.12263	2.57	2.7653	4.49	0.88	1111	High	EC50	Neutral_Organics	days_weeks	0.124726	0.0540476	0.0790595	-0.152441	4.12135	0.675105
89-83-8	89838	thymol	31	150.22	0.347547	3.52	2.7458	3.94	0.42	1111	High	EC50	Phenols	days_weeks	0.117429	0.362945	0.848109	-0.674965	3.63369	0.51974
9002-92-0	9002920	.alpha.-Dodecyl-.omega.-hydroxypoly(oxy-1,2-ethanediyl)	18	406.61	-10.1226	3.4	1.05346	3.52	0.3	1111	High	EC50	Neutral_Organics	days_weeks	-0.516036	0.323927	-0.953182	1.40435	3.42412	0.785619
9016-45-9	9016459	Nonylphenol, ethoxylated	29	440.62	-9.88885	4.48	-0.724412	3.87	0.68	1111	High	EC50	Neutral_Organics	days_weeks	-1.18152	0.675094	-0.912961	1.68017	2.91165	0.858498
9036-19-5	9036195	alpha-[(1,1,3,3-Tetramethylbutyl)phenyl]-omega-hydroxypoly(oxy-1,2-ethanediyl)	17	426.6	-10.7471	3.77	0.614686	3.9	0.75	1111	High	EC50	Neutral_Organics	weeks	-0.680276	0.444234	-1.06062	1.56646	2.87105	0.892769
91-20-3	91203	Naphthalene	82	128.17	0.731212	3.17	1.95826	3.62	0.48	1111	High	EC50	Neutral_Organics	days_weeks	-0.177359	0.249141	0.914115	-0.85379	4.04451	0.679222
91-22-5	91225	Quinoline	58	129.16	0.856419	2.14	2.54911	4.57	0.49	1111	High	EC50	Neutral_Organics	days_weeks	0.0438061	-0.0857693	0.935656	-0.845761	4.22604	0.677972
91465-08-6	91465086	Lambda-Cyhalothrin	65	449.86	-8.82391	7	-2.30103	0.04	1.34	1111	High	EC50	Esters	weeks	-1.77167	1.49449	-0.72975	1.7551	0.97903	1.20995
93-76-5	93765	2-(2,4,5-Trichlorophenoxy)acetic acid	26	255.49	-4.42597	3.31	2.44404	4.31	0.47	1111	High	EC50	Neutral_Organics	days_weeks	0.00447739	0.294663	0.0268728	0.178769	4.01368	0.670578
94-74-6	94746	MCPA	40	200.62	-5.22915	3.25	2.79934	4.46	1.11	1111	High	EC50	Neutral_Organics	days	0.137469	0.275153	-0.111306	-0.266224	4.29721	0.75571
94-75-7	94757	2,4-D	98	221.04	-4.08355	2.81	2.83059	4.71	0.93	1111	High	EC50	Neutral_Organics	days_weeks	0.149166	0.132085	0.0857833	-0.100618	4.13986	0.662159
94-80-4	94804	2-(2,4-Dichlorophenoxy)acetic acid, Butyl ester	29	277.15	-4.21042	4.38	1.66276	3.29	0.62	1111	High	EC50	Esters	days_weeks	-0.287969	0.642579	0.063956	0.354431	2.69569	0.938719
944-22-9	944229	Fonofos	39	246.33	-3.47108	3.94	1.1959	1.85	1.09	1111	High	EC50	Esters	days_weeks	-0.46272	0.499511	0.191151	0.104482	2.58835	0.980204
95-47-6	95476	o-xylene	41	106.17	2.95798	3.09	2.27832	4.04	0.62	1111	High	EC50	Neutral_Organics	days_weeks	-0.057556	0.223128	1.29721	-1.03221	4.21079	0.65004
95-48-7	95487	o-cresol	115	108.14	1.52277	2.06	4.23812	4.48	0.4	1111	High	EC50	Phenols	days_weeks	0.676025	-0.111782	1.05029	-1.01623	4.11279	0.471161
95-50-1	95501	1,2-Dichlorobenzene	66	147	0.167317	3.43	1.90309	3.94	0.57	1111	High	EC50	Neutral_Organics	days_weeks	-0.198009	0.333681	0.817103	-0.701079	4.00825	0.676382
95-57-8	95578	2-Chlorophenol	28	128.56	0.403121	2.15	4.45484	4.21	0.41	1111	High	EC50	Phenols	days_weeks	0.757147	-0.0825177	0.85767	-0.850627	4.13779	0.46009
95-95-4	95954	2,4,5-Trichlorophenol	23	197.45	-2.12494	3.72	3.07918	3	0.24	1111	High	EC50	Phenols	weeks	0.242218	0.427976	0.422742	-0.291932	3.2436	0.593733
95737-68-1	95737681	2-[1-Methyl-2-(4-phenoxyphenoxy)ethoxy]pyridine	28	321.38	-5.66154	5.55	-0.7734	2.03	0.89	1111	High	EC50	Neutral_Organics	days_weeks	-1.19986	1.02301	-0.185696	0.713134	3.02966	0.800987
97-17-6	97176	Diethyl-2,4-dichlorophenyl phosphorothionate	16	315.15	-3.25181	5.14	-0.610834	2.82	0.99	1111	High	EC50	Esters	days_weeks	-1.13901	0.889697	0.228875	0.662609	2.06628	1.05069
98-95-3	98953	Nitrobenzene	52	123.11	-0.610834	1.85	3.32015	4.55	0.36	1111	High	EC50	Neutral_Organics	days_weeks	0.332414	-0.180064	0.683229	-0.894826	4.40205	0.647177
99607-70-2	99607702	cloquintoceet	40	335.83	-3.79238	5.28	-0.315774	3.94	0.91	1111	High	EC50	Esters	days	-1.02856	0.935219	0.135875	0.830323	2.33974	1.1311
999-81-5	999815	(2-Chloroethyl)trimethyl ammonium, Chloride	19	158.07	-7.12494	-3.8	5.99826	5.35	0.78	1111	High	EC50	Neutral_Organics	days_weeks	1.33487	-2.01719	-0.437458	-0.611302	4.99802	0.714004
100-66-3	100663	anisole	13	108.14	2.65375	2.07	3.52158	3.2729	0.7491	1224	Moderate	NOEC	Neutral_Organics	days	0.386349	-0.016639	1.17444	-0.904659	2.90331	1.30849
10007-85-9	10007859	3,6-Dichloro-2-methoxybenzoic acid, Potassium salt	2	259.13	-10.3605	-0.9	5.09096	4.8741	0.9236	1223	Moderate	NOEC	Neutral_Organics	days_weeks	1.00705	-0.973948	-0.899957	0.229643	3.19819	1.31371
100784-20-1	100784201	Halosulfuron	18	434.81	-11.5607	-0.02	1.17609	1.8078	1.9977	1211	Moderate	NOEC	Esters	days_weeks	-0.541317	-0.690301	-1.09125	1.54943	1.29322	1.57623
101-21-3	101213	Chlorpropham	14	213.66	-3.74473	3.51	1.94939	2.6758	0.1665	1224	Moderate	NOEC	Esters	days_weeks	-0.235469	0.447511	0.154559	-0.111947	1.42654	1.0056
101-84-8	101848	diphenyl ether	24	170.21	0.355279	4.05	1.58063	2.293	0.4711	1224	Moderate	NOEC	Neutral_Organics	days_weeks	-0.381318	0.621567	0.808074	-0.438362	1.99933	1.07739
103-23-1	103231	bis(2-ethylhexyl) adipate	10	370.57	-3.37002	8.12	-1.82725	2.495	1.3503	1225	Moderate	NOEC	Esters	hours_days	-1.72917	1.93343	0.214285	1.06683	0.430395	1.40047
103-69-5	103695	N-Ethylaniline	13	121.18	1.61619	2.11	3.168	3.3927	0.6478	1224	Moderate	NOEC	Neutral_Organics	days_weeks	0.246502	-0.00374595	1.00906	-0.806697	2.46297	1.03551
103-90-2	103902	paracetamol	13	151.17	-3.58737	0.27	3.90612	2.1052	1.1085	1211	Moderate	NOEC	Phenols	days	0.538439	-0.596826	0.179641	-0.581399	2.42739	1.0146
10311-84-9	10311849	Dialifos	2	393.85	-7.20761	4.69	-0.744727	0.1901	1.38	1223	Moderate	NOEC	Esters	days_weeks	-1.30102	0.827856	-0.397403	1.24172	0.656635	1.40761
103112-35-2	103112352	fenchlorazool-ethyl	7	403.48	-8.17522	4.52	-0.0457575	1.7073	0.41	1224	Moderate	NOEC	Esters	weeks_months	-1.02457	0.77306	-0.551635	1.31406	0.487479	1.38063
104-43-8	104438	4-Dodecylphenol	2	262.44	-5.63827	7.91	-1.87063	1.1611	0.8399	1224	Moderate	NOEC	Phenols	days_weeks	-1.74633	1.86575	-0.147261	0.254509	0.360695	0.720031
104-76-7	104767	2-Ethylhexanol	14	144.26	0.769269	3.22	2.14749	3.4235	0.1803	1224	Moderate	NOEC	Neutral_Organics	days	-0.157119	0.354036	0.874062	-0.63331	2.51215	1.30696
104-90-5	104905	5-Ethyl-2-methylpyridine	3	121.18	2.14602	2.39	4.91913	3.0939	0.7491	1223	Moderate	NOEC	Neutral_Organics	days_weeks	0.939093	0.0865054	1.09351	-0.806697	2.98552	1.12635
105-53-3	105533	diethyl malonate	11	160.17	1.68234	0.9	4.61062	4.0176	0.7491	1224	Moderate	NOEC	Esters	days	0.817073	-0.393761	1.0196	-0.513787	2.50805	1.39417
105-58-8	105588	Diethyl carbonate	6	118.13	3.20401	1.22	4.62541	4.7014	0.7491	1223	Moderate	NOEC	Esters	days_weeks	0.822922	-0.290616	1.26214	-0.829609	2.14618	1.01139
105-75-9	105759	dibutyl fumarate	13	228.29	-0.149258	4.16	2.12733	1.6729	0.3681	1224	Moderate	NOEC	Esters	hours_days	-0.165092	0.657023	0.727654	-0.00204007	1.58444	1.2167
10552-74-6	10552746	nitrothal-isopropyl	4	295.29	-4.41005	3.3	0.431364	2.199	0.8398	1224	Moderate	NOEC	Esters	days	-0.835864	0.379822	0.0485104	0.501293	1.32299	1.48197
106-41-2	106412	4-Bromophenol	2	173.01	-1.93181	2.59	4.14613	3.6117	0.8399	1224	Moderate	NOEC	Phenols	days_weeks	0.633363	0.150971	0.443526	-0.417327	2.13188	0.84635
108-01-0	108010	Dimethylethanolamine	5	89.139	2.6407	-0.94	6	4.253	0.7491	1223	Moderate	NOEC	Aliphatic_Amines	days_weeks	1.36659	-0.986841	1.17236	-1.0474	2.64404	0.740794
108-05-4	108054	Vinyl acetate	14	86.09	4.20038	0.73	4.44705	3.6112	0.5643	1224	Moderate	NOEC	Esters	days	0.75238	-0.448556	1.42096	-1.07031	2.42624	1.19762
108-10-1	108101	4-Methyl-2-pentanone	14	100.16	3.46329	1.16	4.00758	5.0175	0.3947	1224	Moderate	NOEC	Neutral_Organics	days_weeks	0.578565	-0.309956	1.30347	-0.964608	2.69304	1.06248
108-31-6	108316	Maleic anhydride	28	98.057	1.34494	1.62	4.98495	4.0636	0.7491	1224	Moderate	NOEC	Neutral_Organics	days_weeks	0.965127	-0.161686	0.96582	-0.980406	3.01571	1.03508
108-70-3	108703	1,3,5-Trichlorobenzene	2	181.45	-0.339135	4.19	1.47712	2.624	0.7024	1224	Moderate	NOEC	Neutral_Organics	weeks	-0.422257	0.666693	0.697389	-0.353922	2.09579	0.986575
110-58-7	110587	1-Pentanamine	2	87.17	1.47712	1.49	6	3.8687	0.7024	1224	Moderate	NOEC	Aliphatic_Amines	days	1.36659	-0.203588	0.986889	-1.06219	3.00578	0.945378
110-83-8	110838	Cyclohexene	10	82.146	4.05983	2.96	2.40981	2.9019	0.736	1224	Moderate	NOEC	Neutral_Organics	days_weeks	-0.0533667	0.270231	1.39856	-1.09994	2.20238	0.920869
11096-82-5	11096825	Aroclor 1260	9	395.33	-6.88606	7.55	-1.84164	2.332	1.024	1224	Moderate	NOEC	Neutral_Organics	months	-1.73486	1.74971	-0.34615	1.25284	1.96346	0.723937
111-15-9	111159	2-Ethoxyethanol, Acetate	10	132.16	0.369216	0.59	5.3927	3.8971	0.3753	1224	Moderate	NOEC	Esters	days	1.12639	-0.493682	0.810296	-0.72421	2.76134	1.29838
111-26-2	111262	1-Hexanamine	2	101.19	0.95376	2.06	4.07918	3.6896	0.7024	1224	Moderate	NOEC	Aliphatic_Amines	days	0.606885	-0.0198623	0.903469	-0.95687	2.43186	0.885989
111-40-0	111400	Diethylene triamine	33	103.17	1.52966	-2.13	6	4.4572	0.6704	1224	Moderate	NOEC	Aliphatic_Amines	days	1.36659	-1.37041	0.995264	-0.941995	3.0051	1.0476
111-68-2	111682	1-Heptanamine	8	115.22	0.437751	2.57	3.83193	3.4567	0.7024	1224	Moderate	NOEC	Aliphatic_Amines	days	0.509096	0.144524	0.82122	-0.851471	2.36375	0.903627
111-76-2	111762	2-Butoxyethanol	32	118.18	1.80152	0.57	4.8484	5.1028	0.2522	1224	Moderate	NOEC	Neutral_Organics	days	0.911121	-0.500128	1.0386	-0.829234	3.31535	1.39892
112-00-5	112005	N,N,N-Trimethyl-1-dodecanaminium, Chloride	6	263.9	-8.03292	1.22	3.25406	1.6866	1.1221	1224	Moderate	NOEC	Neutral_Organics	days_weeks	0.280543	-0.290616	-0.528953	0.265478	2.61299	1.28561
112-05-0	112050	Nonanoic acid	9	158.24	0.455244	3.52	2.61568	4.1068	0.1272	1223	Moderate	NOEC	Neutral_Organics	hours_days	0.0280537	0.450734	0.824008	-0.528286	2.46125	1.15122
112-20-9	112209	1-Nonanamine	2	143.27	-0.555955	3.29	3.10721	2.6969	0.7024	1224	Moderate	NOEC	Aliphatic_Amines	days	0.22246	0.376599	0.662829	-0.640747	2.15744	0.933145
112-53-8	112538	1-Dodecanol	19	186.34	-0.617491	4.77	0.762468	2.0174	0.6104	1224	Moderate	NOEC	Neutral_Organics	days	-0.704909	0.853642	0.653021	-0.317187	2.11129	1.33483
112-65-2	112652	Dodecylguanidine HCL	6	227.4	-4.76955	4.24	2.79934	3.0694	1.375	1224	Moderate	NOEC	Aliphatic_Amines	days	0.100695	0.682809	-0.00879183	-0.00872614	2.11852	1.08709
112143-82-5	112143825	[[1-[(Dimethylamino)carbonyl]-3-(1,1-dimethylethyl)-1H-1,2,4-triazol-5-yl]thio]acetic acid ethyl ester	8	314.41	-6.92082	2.69	2.63649	2.2519	1.6718	1223	Moderate	NOEC	Esters	days_weeks	0.0362848	0.183203	-0.351691	0.64493	1.67506	1.3138
115-31-1	115311	Exo-1,7,7-Trimethylbicyclo[2.2.1]hept-2-yl ester thiocyanato acetic acid	8	253.36	-4.60206	3.75	1.15259	1.7121	0.5738	1224	Moderate	NOEC	Esters	days_weeks	-0.55061	0.524869	0.0179052	0.186297	1.1967	1.08256
116-29-0	116290	Tetradifon	8	356.05	-9.61979	4.61	-1.10791	2.1728	0.5493	1224	Moderate	NOEC	Neutral_Organics	weeks_months	-1.44466	0.80207	-0.78189	0.957748	0.921915	1.25862
119-06-2	119062	1,2-Benzenedicarboxylic acid, Ditridecyl ester	6	530.84	-10.6003	13.45	-8.82974	1.3511	0.346	1224	Moderate	NOEC	Esters	days	-4.49873	3.65143	-0.938181	2.27085	-1.39702	1.59501
119-33-5	119335	2-Nitro-p-cresol	4	153.14	-1.10791	2.37	2.8014	3.4412	0.8399	1224	Moderate	NOEC	Phenols	days_weeks	0.101511	0.0800589	0.574852	-0.566599	1.71479	0.740774
119-65-3	119653	Isoquinoline	6	129.16	0.688311	2.14	3.31018	3.2726	0.237	1224	Moderate	NOEC	Neutral_Organics	days_weeks	0.302738	0.00592383	0.861158	-0.746747	2.51788	1.04399
120-18-3	120183	2-Naphthalenesulfonic acid	9	208.24	-4.9978	0.01	3.42651	4.2835	0.6893	1224	Moderate	NOEC	Neutral_Organics	days_weeks	0.348747	-0.680631	-0.0451732	-0.152664	2.62612	1.19634
120-78-5	120785	2.2’-Dithiobisbenzothiazole	5	332.49	-7.08208	4.66	-2.6968	4.6008	0.7491	1223	Moderate	NOEC	Neutral_Organics	days_weeks	-2.07309	0.818186	-0.377394	0.780755	0.801876	1.24108
120-94-5	120945	1-Methylpyrrolidine	9	85.15	2	0.92	5.32858	4.7994	1.312	1224	Moderate	NOEC	Aliphatic_Amines	days_weeks	1.10104	-0.387314	1.07023	-1.07737	2.44931	0.65565
121-54-0	121540	N,N-Dimethyl-N-[2-[2-[4-(1,1,3,3-tetramethylbutyl)phenoxy]ethoxy]ethyl]benzenemethanaminium, Chloride	7	448.09	-13.4191	4	-0.228192	2.9042	0.3999	1224	Moderate	NOEC	Neutral_Organics	weeks	-1.09673	0.605451	-1.38747	1.64919	1.74838	1.4882
12124-97-9	12124979	Ammonium bromide ((NH4)Br)	22	97.94	-13.9508	-4.37	5.88309	2.3667	2.421	1223	Moderate	NOEC	Inorganic_Compound	days_weeks	1.32035	-2.09242	-1.47222	-0.981285	4.50084	0.77722
123-03-5	123035	1-Hexadecylpyridinium, Chloride	8	340	-5.46218	1.71	2.39199	1.5777	0.8456	1224	Moderate	NOEC	Neutral_Organics	days_weeks	-0.0604154	-0.132676	-0.119193	0.837174	2.31936	1.5799
123-86-4	123864	n-butyl acetate	26	116.16	3.20038	1.85	3.6018	4.0144	0.4479	1224	Moderate	NOEC	Esters	days	0.418075	-0.0875508	1.26157	-0.844409	2.18358	1.2237
124-48-1	124481	Dibromochloromethane	2	208.28	1.19312	2.16	3.43136	3.6722	0.7024	1224	Moderate	NOEC	Neutral_Organics	days_weeks	0.350666	0.0123704	0.941622	-0.152364	2.54803	1.34206
124-65-2	124652	Dimethyl arsinic acid, Sodium salt	11	159.98	-7.5391	-2.18	6.30103	3.7664	0.3023	1224	Moderate	NOEC	Neutral_Organics	days_weeks	1.48565	-1.38653	-0.450241	-0.515214	3.52772	1.11327
125401-92-5	125401925	2,6-Bis[(4,6-dimethoxy-2-pyrimidinyl)oxy]benzoic acid sodium salt	9	452.36	-18.3546	-1.03	2.72795	3.0946	1.2988	1211	Moderate	NOEC	Neutral_Organics	days_weeks	0.0724581	-1.01585	-2.17416	1.68127	2.5866	1.6671
126535-15-7	126535157	Trisulfuron methyl	10	492.43	-12.6778	3.56	-0.136796	1.3131	0.7503	1211	Moderate	NOEC	Esters	weeks	-1.06058	0.463627	-1.26931	1.98229	1.02953	1.53999
12672-29-6	12672296	Aroclor 1248	12	291.99	-3.30627	6.2	-1	1.9135	0.9794	1224	Moderate	NOEC	Neutral_Organics	weeks	-1.40198	1.31457	0.224446	0.476502	1.38511	1.15658
127-07-1	127071	Hydroxyurea	3	76.057	-3.53018	-1.8	6	4.7531	0.7024	1224	Moderate	NOEC	Neutral_Organics	days_weeks	1.36659	-1.26404	0.188757	-1.14568	3.3852	0.910397
127-91-3	127913	pin-2(10)-ene	3	136.24	2.5245	4.35	1.2467	1.8988	0.7024	1224	Moderate	NOEC	Neutral_Organics	days_weeks	-0.513392	0.718265	1.15384	-0.693559	1.87051	0.999002
129-67-9	129679	7-Oxobicyclo[2.2.1]heptane-2,3-dicarboxylic acid, Disodium salt	14	230.13	-8.97881	0.23	4.28443	3.888	0.7442	1224	Moderate	NOEC	Neutral_Organics	hours_days	0.688063	-0.609719	-0.679722	0.0117828	3.08694	1.25904
129630-19-9	129630199	2-[2-Chloro-5-[4-chloro-5-(difluoromethoxy)-1-methyl-1H-pyrazol-3-yl]-4-fluorophenoxy]acetic acid ethyl ester	14	413.18	-4.44491	3.49	0	0.9814	1.925	1223	Moderate	NOEC	Esters	days_weeks	-1.00647	0.441064	0.0429547	1.38693	0.846256	1.60091
132-27-4	132274	[1,1'-Biphenyl]-2-ol, Sodium salt	2	192.19	-10.719	0.59	6	2.6857	0.8011	1223	Moderate	NOEC	Phenols	days_weeks	1.36659	-0.493682	-0.957092	-0.273239	2.80522	0.778973
1338-24-5	1338245	Naphthenic acid	24	128.17	-1.31876	2.36	3.35334	2.9554	0.3475	1224	Moderate	NOEC	Neutral_Organics	days	0.319807	0.0768356	0.541243	-0.754185	2.9035	1.25769
135590-91-9	135590919	1-(2,4-Dichlorophenyl)-4,5-dihydro-5-methyl-1H-pyrazole-3,5-dicarboxylic acid 3,5-diethyl ester	14	373.24	-3.35534	4.82	0.379215	2.8376	0.4427	1223	Moderate	NOEC	Esters	days_weeks	-0.85649	0.869758	0.216624	1.08689	0.946888	1.49131
13674-87-8	13674878	1,3-Dichloro-2-propanol phosphate (3:1)	19	430.91	-4.4188	3.65	0.278662	2.6651	0.341	1223	Moderate	NOEC	Esters	weeks	-0.896259	0.492636	0.0471151	1.52013	1.04898	1.57007
138-86-3	138863	Limnonene	28	136.24	0.158362	4.38	1.13988	3.4888	0.8126	1224	Moderate	NOEC	Neutral_Organics	days_weeks	-0.555639	0.727935	0.776687	-0.693559	1.86863	0.92815
139-13-9	139139	Nitrilotriacetic acid	12	191.14	-6.02026	-3.81	4.44404	4.3477	0.3838	1224	Moderate	NOEC	Aliphatic_Amines	hours_days	0.751192	-1.91192	-0.208147	-0.281127	2.43531	0.884175
140-57-8	140578	Sulfurous acid 2-Chloroethyl 2-[4-(1,1-dimethylethyl)phenoxy]-1-methylethyl ester	11	334.86	-5.41117	4.82	-0.229001	1.5961	0.8809	1224	Moderate	NOEC	Neutral_Organics	weeks	-1.09705	0.869758	-0.111062	0.79856	1.64523	1.30122
1401-55-4	1401554	Tannic acid	6	636.48	-28.0545	-0.19	2.70961	2.541	1.2242	1224	Moderate	NOEC	Esters	days	0.065205	-0.745096	-3.72027	3.06446	2.31554	2.17475
141112-29-0	141112290	(5-Cyclopropyl-4-isoxazolyl)[2-(methylsulfonyl)-4-(trifluoromethyl)phenyl]methanone	8	359.32	-8.12494	2.32	0.792392	0.7087	1.1082	1211	Moderate	NOEC	Neutral_Organics	weeks	-0.693074	0.0639426	-0.54362	0.982314	1.98886	1.38921
142-96-1	142961	dibutyl ether	18	130.23	3.01076	3.01	2.62244	3.8373	0.4455	1224	Moderate	NOEC	Neutral_Organics	days	0.0307295	0.286348	1.23134	-0.738709	2.62692	1.34385
1420-06-0	1420060	4-(Triphenylmethyl)morpholine	18	329.45	-7.55596	4.21	-1.69897	1.1926	0.6155	1224	Moderate	NOEC	Aliphatic_Amines	weeks	-1.67843	0.673139	-0.452927	0.757917	0.566572	0.787027
143-07-7	143077	lauric acid	11	200.32	-0.725951	5	1.43846	3.3725	0.5693	1224	Moderate	NOEC	Neutral_Organics	days	-0.437546	0.927777	0.635733	-0.212163	2.31703	1.40898
143-08-8	143088	1-Nonanol	10	144.26	0.640704	3.3	2.08948	3.0387	0.3292	1224	Moderate	NOEC	Neutral_Organics	days	-0.180062	0.379822	0.853569	-0.63331	2.49626	1.29977
1445-75-6	1445756	Diisopropylmethyl phosphonate (dimp)	8	180.19	-0.55752	1.03	3.17609	4.7544	0.3576	1224	Moderate	NOEC	Esters	days_weeks	0.249703	-0.351858	0.66258	-0.363388	1.75641	1.06221
147150-35-4	147150354	3-Chloro-2-[[(5-ethoxy-7-fluoro[1,2,4]triazolo[1,5-c]pyrimidin-2-yl)sulfonyl]amino]benzoic acid, Methyl ester	9	429.81	-10.7825	2.7	1.20412	4.0488	1.6647	1223	Moderate	NOEC	Esters	days_weeks	-0.530231	0.186427	-0.967221	1.51186	1.2917	1.54812
148477-71-8	148477718	2,2-Dimethylbutanoic acid, 3-(2,4-Dichlorophenyl)-2-oxo-1-oxaspiro[4.5]dec-3-en-4-yl ester	9	411.33	-9.10182	6.21	-1.8911	1.7395	1.7972	1223	Moderate	NOEC	Esters	weeks	-1.75442	1.31779	-0.699329	1.37304	0.453266	1.24119
149-31-5	149315	2-Methyl-1,3-pentanediol	10	118.18	-1.42366	0.62	4.48058	5.8818	0.3164	1224	Moderate	NOEC	Neutral_Organics	days	0.765643	-0.484012	0.524523	-0.829234	3.2456	1.29213
15165-67-0	15165670	Dichlorprop-P	18	235.07	-6.33255	-0.25	2.77085	4.4221	0.7641	1224	Moderate	NOEC	Neutral_Organics	days_weeks	0.0894272	-0.764436	-0.257924	0.0488942	2.44507	1.22725
152-16-9	152169	Octamethylphosphoramide	2	286.25	-3	-1.01	6	4.2277	1.0128	1224	Moderate	NOEC	Esters	days_weeks	1.36659	-1.0094	0.273264	0.43338	2.64144	1.52154
156-87-6	156876	Aminopropanol	7	75.112	1.31795	-1.12	6	4.7093	0.7491	1223	Moderate	NOEC	Aliphatic_Amines	days	1.36659	-1.04486	0.961519	-1.15278	3.00782	0.930474
15627-09-5	15627095	Bis[N-(hydroxy-kappaO)-N-(nitroso-kappaO)cyclohexanaminato]copper	6	144.17	-4.65365	1.04	4.0162	1.5809	0.6465	1223	Moderate	NOEC	Aliphatic_Amines	days_weeks	0.581974	-0.348635	0.00968256	-0.633986	2.1381	0.617962
15922-78-8	15922788	1-Hydroxy-2(1H)pyridinethione, Sodium salt	13	149.14	-9.91009	-2.72	6	1.3457	1.6402	1223	Moderate	NOEC	Neutral_Organics	days_weeks	1.36659	-1.56058	-0.828163	-0.596649	3.46719	1.00225
1593-77-7	1593777	Dodemorf	7	281.49	-5.4437	5.7	0.333649	2.6249	0.8035	1224	Moderate	NOEC	Aliphatic_Amines	weeks	-0.874512	1.15341	-0.116247	0.397621	1.15387	0.750714
163520-33-0	163520330	AE F 122006	8	295.34	-6.29328	5.66	-0.717378	2.0505	0.4759	1223	Moderate	NOEC	Aliphatic_Amines	days_weeks	-1.2902	1.14051	-0.251665	0.501668	0.728247	0.833424
16484-77-8	16484778	mecoprop-p	6	214.65	-5.52288	3.2	2.9345	3.5855	0.7641	1223	Moderate	NOEC	Neutral_Organics	days	0.154151	0.34759	-0.128868	-0.10451	2.83092	1.41648
165252-70-0	165252700	N''-Methyl-N-nitro-N'-[(tetrahydro-3-furanyl)methyl]guanidine	11	202.21	-3.64397	-0.64	5.17638	4.2073	0.837	1223	Moderate	NOEC	Aliphatic_Amines	days_weeks	1.04084	-0.890143	0.170618	-0.197964	2.47584	0.923809
16672-87-0	16672870	Ethephon	25	144.49	-7.00877	-0.22	6	4.2722	0.3309	1224	Moderate	NOEC	Neutral_Organics	days_weeks	1.36659	-0.754766	-0.36571	-0.631582	3.42991	1.03568
1678-91-7	1678917	Ethylcyclohexane	2	112.22	1.10721	4.56	0.799341	2.718	0.7024	1224	Moderate	NOEC	Neutral_Organics	days_weeks	-0.690326	0.785953	0.927928	-0.874008	1.75349	0.852145
1689-83-4	1689834	Ioxynil	8	370.91	-6.86012	3.43	1.69897	2.8039	0.1828	1224	Moderate	NOEC	Phenols	weeks	-0.334513	0.421725	-0.342016	1.06938	1.57429	1.18077
17439-94-0	17439940	7-Oxabicyclo(2.2.1)heptane-2,3-dicarboxylic acid, Diammonium salt	10	186.17	-9.8041	1.91	5	4.0156	0.5014	1224	Moderate	NOEC	Neutral_Organics	hours_days	0.971078	-0.0682112	-0.811268	-0.318464	3.31385	1.09316
1757-18-2	1757182	Akton	7	375.64	-5.31426	5.91	-1.41184	0.42	1.5613	1224	Moderate	NOEC	Esters	days_weeks	-1.56487	1.22109	-0.0956148	1.10492	0.430641	1.35068
18181-80-1	18181801	Bromopropylate	9	428.13	-7.08619	5.4	-1	2.1647	0.5493	1224	Moderate	NOEC	Esters	weeks	-1.40198	1.05671	-0.378049	1.49924	0.696734	1.40672
18496-25-8	18496258	Sulfide	6	34.08	-8.41908	-1.38	6	2.4132	0.6236	1224	Moderate	NOEC	Inorganic_Compound	days	1.36659	-1.12866	-0.590503	-1.46103	4.81187	0.947867
1928-43-4	1928434	2-(2,4-Dichlorophenoxy)acetic acid, 2-Ethylhexyl ester	16	333.26	-5.34008	5.78	-1.04345	2.598	0.7803	1211	Moderate	NOEC	Esters	days_weeks	-1.41917	1.17919	-0.0997312	0.78654	0.542335	1.21896
19398-13-1	19398131	2-(2,4,5-Trichlorophenoxy)propanoic acid, 2-Butoxyethyl ester	8	369.68	-5.98716	5.16	-0.737786	2.6663	0.9897	1224	Moderate	NOEC	Esters	days_weeks	-1.29828	0.979349	-0.202872	1.06014	0.643049	1.35084
1948-33-0	1948330	2-tert-butylhydroquinone	13	166.22	-1.78175	2.94	3.01106	1.5738	0.4526	1224	Moderate	NOEC	Phenols	days_weeks	0.184433	0.263785	0.467446	-0.468337	1.78683	0.770714
2008-46-0	2008460	(2,4,5-Trichlorophenoxy)acetic acid, Compd. with N,N-Diethylethanamine (1:1)	4	255.49	-4.42597	3.31	2.44404	3.636	0.8392	1224	Moderate	NOEC	Neutral_Organics	days_weeks	-0.0398284	0.383046	0.0459731	0.202298	2.32178	1.29359
2016-57-1	2016571	1-Decanamine	6	157.3	-1	3.78	2.74036	2.2899	0.7024	1224	Moderate	NOEC	Aliphatic_Amines	days	0.0773683	0.534539	0.592051	-0.535348	2.05225	0.947589
20679-58-7	20679587	2-Butene-1,4-diyl ester, Bromoacetic acid	16	329.97	-2.83268	1.86	2.32469	1.0731	0.4283	1224	Moderate	NOEC	Esters	days	-0.0870329	-0.0843275	0.299933	0.761824	1.87505	1.75162
20762-60-1	20762601	Potassium azide	8	81.12	-21.7496	0.16	4.54332	2.6512	0.423	1224	Moderate	NOEC	Inorganic_Compound	days	0.790458	-0.632282	-2.7153	-1.10764	4.54284	0.6588
208465-21-8	208465218	Mesosulfuron-methyl	10	503.51	-15.7721	0.8	2.15076	3.8898	1.1942	1223	Moderate	NOEC	Esters	days_weeks	-0.155827	-0.425993	-1.76253	2.06553	1.64198	1.73574
22204-53-1	22204531	Naproxen	10	230.26	-5.8962	3.18	1.2014	3.3308	1.1161	1224	Moderate	NOEC	Neutral_Organics	days	-0.531308	0.341143	-0.188372	0.0127594	2.31181	1.38262
2275-23-2	2275232	vamidothion	3	287.34	-5.86328	0.06	6	3.7443	1.38	1224	Moderate	NOEC	Esters	days	1.36659	-0.664515	-0.183125	0.441569	3.02502	1.70643
2372-82-9	2372829	N-(3-aminopropyl)-N-dodecylpropane-1,3-diamine	11	299.55	-3.70198	4.46	2.38182	1.4321	0.694	1223	Moderate	NOEC	Aliphatic_Amines	days_weeks	-0.0644395	0.753721	0.161372	0.533296	1.63181	1.07568
2446-69-7	2446697	4-Hexylphenol	2	178.28	-3.14086	4.52	1.4729	1.6165	0.8399	1224	Moderate	NOEC	Phenols	days	-0.423925	0.77306	0.250811	-0.377737	1.6861	0.959833
24938-91-8	24938918	Tridecyl mono-octyl ether	3	420.64	-10.5638	3.89	0.546543	2.4977	0.7024	1224	Moderate	NOEC	Neutral_Organics	days_weeks	-0.79031	0.569995	-0.932365	1.44298	1.82706	1.61196
25167-81-1	25167811	Dichlorophenol	2	163	-1.04576	3.06	3.65321	2.5669	0.8399	1224	Moderate	NOEC	Phenols	days_weeks	0.43841	0.302464	0.584758	-0.492527	1.97149	0.807491
25322-68-3	25322683	.alpha.-Hydro-.omega.-hydroxypoly(oxy-1,2-ethanediyl)	9	238.28	-6.52433	-2.3	6	5.4807	0.7895	1224	Moderate	NOEC	Neutral_Organics	days_weeks	1.36659	-1.4252	-0.288493	0.0730091	3.42368	1.40512
25322-69-4	25322694	Polypropylene glycol	15	308.42	-5.02208	-0.21	2.97653	5.6815	0.7411	1224	Moderate	NOEC	Neutral_Organics	days_weeks	0.170774	-0.751543	-0.0490434	0.599931	2.49041	1.53093
2536-31-4	2536314	2-Chloro-9-hydroxy-9H-fluorene-9-carboxylic acid, Methyl ester	4	274.71	-7.62709	2.86	1.25527	2.5271	0.9236	1223	Moderate	NOEC	Esters	days_weeks	-0.51	0.237999	-0.464266	0.346687	1.26661	1.08947
25954-13-6	25954136	Fosamine ammonium	12	170.11	-5.40012	-5.98	6	4.499	0.6818	1211	Moderate	NOEC	Esters	days_weeks	1.36659	-2.61137	-0.1093	-0.439113	2.67228	1.10665
26225-79-6	26225796	Ethofumesate	15	286.35	-5.3098	2.7	1.69897	3.6002	0.6175	1223	Moderate	NOEC	Esters	days_weeks	-0.334513	0.186427	-0.0949048	0.434132	1.37096	1.21688
26952-21-6	26952216	Isooctanol	3	130.23	-0.463442	2.73	2.80618	3.5548	0.7024	1224	Moderate	NOEC	Neutral_Organics	days	0.1034	0.196096	0.677575	-0.738709	2.72711	1.25927
2702-72-9	2702729	(2,4-Dichlorophenoxy)acetic acid, Sodium salt	10	243.02	-10.3605	-1.19	5.52504	4.2363	0.6399	1224	Moderate	NOEC	Neutral_Organics	days_weeks	1.17874	-1.06742	-0.899957	0.108618	3.32941	1.28023
271-89-6	271896	2,3-Benzofuran	3	118.14	-0.356547	2.67	2.72819	3.1994	0.7024	1224	Moderate	NOEC	Neutral_Organics	days_weeks	0.0725545	0.176757	0.694614	-0.829534	2.35538	0.943231
283594-90-1	283594901	3,3-Dimethylbutanoic acid 2-oxo-3-(2,4,6-trimethylphenyl)-1-oaxspiro[4.4]non-3-en-4-yl ester	13	370.49	-8.58503	6.08	-1.52129	1.0855	1.1191	1223	Moderate	NOEC	Esters	days_weeks	-1.60816	1.27589	-0.616955	1.06623	0.439588	1.23475
29450-45-1	29450451	2-(4-Chloro-2-methylphenoxy)acetic acid, 2-Ethylhexyl ester	6	312.84	-5.07417	6.17	-1.25579	2.0644	0.9976	1223	Moderate	NOEC	Esters	days_weeks	-1.50315	1.3049	-0.0573466	0.633136	0.47473	1.13995
299-85-4	299854	Zytron	3	314.17	-4.2636	4.3	0.69897	0.5002	1.0128	1224	Moderate	NOEC	Esters	weeks	-0.730023	0.702149	0.0718531	0.643127	1.17405	1.17413
299-86-5	299865	Crufomaat	14	291.72	-4.42597	3.42	2.30103	3.2557	0.7013	1224	Moderate	NOEC	Esters	weeks	-0.0963922	0.418501	0.0459731	0.474473	1.66042	1.17411
302-79-4	302794	tretinoin	2	300.44	-6.9914	6.3	-0.898597	0.8929	0.7024	1224	Moderate	NOEC	Neutral_Organics	days_weeks	-1.36188	1.3468	-0.362941	0.539982	1.34429	1.19227
311-45-5	311455	Diethyl-4-nitrophenyl ester phosphoric acid	9	275.2	-5.95861	1.98	3.5611	-0.2496	0.673	1224	Moderate	NOEC	Esters	days	0.401979	-0.0456484	-0.19832	0.350368	2.28898	1.52664
318-98-9	318989	1-[(1-Methylethyl)amino]-3-(1-naphthalenyloxy)-2-propanol hydrochloride (1:1)	19	295.81	-12.5003	0.74	3.47842	2.3486	1.2582	1224	Moderate	NOEC	Neutral_Organics	days_weeks	0.369278	-0.445333	-1.24103	0.505199	2.73823	1.29023
31895-22-4	31895224	N,N-Dimethyl-1,2,3-trithian-5-amine ethanedioate (1:1)	8	271.37	-10.8761	-1.04	5.53542	1.4075	0.9875	1224	Moderate	NOEC	Neutral_Organics	days	1.18284	-1.01907	-0.982146	0.321595	3.68595	1.63805
319-84-6	319846	(1 alpha,2 alpha,3 beta,4 alpha,5 beta,6 beta)1,2,3,4,5,6-Hexachlorocyclohexane	12	290.83	-4.45346	4.14	0.90309	2.1364	0.9686	1224	Moderate	NOEC	Neutral_Organics	weeks	-0.649292	0.650576	0.0415916	0.467787	1.97514	1.23242
3244-90-4	3244904	Thiodiphosphoric acid, Tetrapropyl ester	16	378.42	-4.97062	5.94	1.47712	0.6944	1.2982	1224	Moderate	NOEC	Esters	days	-0.422257	1.23076	-0.0408404	1.1258	1.64631	1.77451
327-98-0	327980	Ethylphosphonothioic acid, O-Ethyl O-(2,4,5-trichlorophenyl)ester	9	333.6	-4.82391	5.23	-0.229148	0.7596	1.1768	1224	Moderate	NOEC	Esters	weeks	-1.0971	1.00191	-0.0174561	0.789094	0.900683	1.17348
333-18-6	333186	Ethylenediamine dihydrochloride	8	131.01	-9.13018	-3.39	6	3.676	0.5627	1224	Moderate	NOEC	Neutral_Organics	days_weeks	1.36659	-1.77654	-0.703849	-0.732849	3.45717	0.968207
333-20-0	333200	Thiocyanic acid, Potassium salt	16	97.18	-7.45469	-2.52	6	3.5684	0.9375	1224	Moderate	NOEC	Neutral_Organics	days	1.36659	-1.49612	-0.436787	-0.986995	3.78242	1.15839
35575-96-3	35575963	azamethifos	12	324.68	-7.43533	1.05	3.04139	2.0639	1.2283	1224	Moderate	NOEC	Esters	days	0.196429	-0.345412	-0.433701	0.722083	2.15085	1.64782
36335-67-8	36335678	O-Ethyl-O-(3-methyl-6-nitrophenyl-N-sec-(1-Methylpropyl)phospheramidothioic acid, O-(5-Methyl-2-nitrophenyl)O-propyl est	3	332.36	-3.20066	4.62	0.791691	2.4733	1.0128	1224	Moderate	NOEC	Esters	weeks	-0.693351	0.805293	0.24128	0.779779	1.18841	1.268
3739-38-6	3739386	3-Phenoxybenzoic acid	8	214.22	-5.50031	3.91	1.22814	3.3517	1.1394	1224	Moderate	NOEC	Neutral_Organics	days_weeks	-0.52073	0.576441	-0.125271	-0.10774	1.96803	1.05575
38260-54-7	38260547	O-(6-Ethoxy-2-ethyl-4-pyrimidinyl)O,O-dimetyl ester, Phosphorothioic acid	11	292.29	-4.09691	2.94	1.60206	1.9163	1.3072	1224	Moderate	NOEC	Esters	days	-0.372842	0.263785	0.098423	0.478755	1.67285	1.5377
3844-45-9	3844459	N-Ethyl-N-[4[[4-[ethyl[(3-sulfophenyl)methyl]amino]phenyl](2-sulfophenyl)methylene]-2,5-cyclohexadien-1-ylidene]-3-sulfo	8	793.86	-41.5272	-4.94	3.13799	4.3701	0.2676	1224	Moderate	NOEC	Neutral_Organics	weeks_months	0.234633	-2.27615	-5.86774	4.24677	2.61546	2.22639
39300-45-3	39300453	2-Butenoic acid, 2(or 4)-isooctyl-4,6(or 2,6)-dinitrophenyl ester	16	364.4	-7.39794	5.98	0.60206	0.7215	0.7136	1224	Moderate	NOEC	Esters	days_weeks	-0.768352	1.24366	-0.427741	1.02048	1.0662	1.34394
4180-23-8	4180238	(E)-anethole	13	148.21	0.926919	3.39	2.1494	2.8476	0.1245	1224	Moderate	NOEC	Neutral_Organics	days_weeks	-0.156362	0.408832	0.89919	-0.603636	2.16392	1.04966
42576-02-3	42576023	bifenox	15	342.13	-7	4.48	-0.400117	2.3647	1.0075	1224	Moderate	NOEC	Esters	weeks	-1.16472	0.760167	-0.364312	0.853175	0.876966	1.14461
464-49-3	464493	(1R,4R)-1,7,7-Trimethylbicyclo[2.2.1]heptan-2-one	3	152.24	-1.14267	2.74	2	4.3176	0.7024	1224	Moderate	NOEC	Neutral_Organics	days_weeks	-0.215453	0.19932	0.569311	-0.57336	2.14535	1.00764
485-31-4	485314	3-Methylcrotonic acid, 2-sec-Butyl-4,6-dinitrophenyl ester	10	322.32	-6.50031	4.49	0	1.7959	0.7136	1224	Moderate	NOEC	Esters	days_weeks	-1.00647	0.763391	-0.284665	0.704354	0.872671	1.21146
4920-77-8	4920778	3-Methyl-2-nitrophenol	2	153.14	-1.42946	2.29	3.54531	3.469	0.8399	1224	Moderate	NOEC	Phenols	days_weeks	0.395732	0.0542728	0.523599	-0.566599	1.9438	0.766641
497-19-8	497198	Sodium carbonate	27	105.99	-16.0035	-6.19	6	4.8198	0.2916	1224	Moderate	NOEC	Neutral_Organics	days	1.36659	-2.67905	-1.79941	-0.92081	3.89228	0.997316
50-21-5	50215	L-Lactic acid	11	90.078	0.581196	-0.65	5.88762	4.5609	0.464	1224	Moderate	NOEC	Neutral_Organics	days	1.32214	-0.893366	0.844084	-1.04035	3.64518	1.32823
50-78-2	50782	Acetyl salicylic acid	17	180.16	-2.05827	1.13	3.36751	4.2546	0.4819	1224	Moderate	NOEC	Esters	days	0.32541	-0.319626	0.42337	-0.363613	2.18033	1.30154
500-99-2	500992	3,5-Dimethoxyphenol	3	154.17	-2.03905	1.64	4.041	3.4151	0.8399	1224	Moderate	NOEC	Phenols	days	0.591783	-0.155239	0.426433	-0.558861	2.44826	1.05745
50512-35-1	50512351	Isoprothiolan	9	290.39	-1.84466	2.88	1.73239	3.0803	0.3479	1224	Moderate	NOEC	Esters	days	-0.321294	0.244445	0.457417	0.464482	1.68331	1.60014
510-15-6	510156	4-Chloro-alpha-(4-chlorophenyl)-alpha-hydroxybenzeneacetic acid ethyl ester	13	325.19	-5.65758	4.74	1.11394	2.4573	0.5493	1224	Moderate	NOEC	Esters	weeks	-0.565897	0.843972	-0.150338	0.725914	1.3174	1.18776
51200-87-4	51200874	4,4-Dimethyloxazolidine	10	101.15	0.879669	-0.08	6	3.8445	0.4431	1224	Moderate	NOEC	Aliphatic_Amines	days_weeks	1.36659	-0.70964	0.891659	-0.957171	2.66668	0.723728
51276-47-2	51276472	Glufosinate	2	181.13	-9.9393	-4.49	6	2.7567	1.0128	1224	Moderate	NOEC	Aliphatic_Amines	days	1.36659	-2.1311	-0.832818	-0.356326	3.15249	1.03313
513-81-5	513815	2,3-Dimethyl-1,3-butadiene	3	82.15	2.18184	3.13	2.51322	3.4457	0.7024	1224	Moderate	NOEC	Neutral_Organics	days_weeks	-0.0124699	0.325027	1.09922	-1.09991	2.25777	0.871408
51384-51-1	51384511	1-[4-(2-Methoxyethyl)phenoxy]-3-[(1-methylethyl)amino]-2-propanol	7	267.37	-6.54061	1.88	4.22789	3.7026	0.6046	1224	Moderate	NOEC	Aliphatic_Amines	days_weeks	0.665699	-0.077881	-0.291087	0.291546	2.22634	0.999076
51596-11-3	51596113	(6R,25R)-5-O-Demethyl-28-deoxy-6,28-epoxy-25-methylmilbemycin B,	10	542.72	-10.011	5.9	0.857332	0.3234	0.983	1223	Moderate	NOEC	Esters	weeks	-0.667389	1.21787	-0.844246	2.36009	1.29578	1.80766
526-75-0	526750	2,3-Dimethylphenol	2	122.17	-1.05061	2.48	3.65992	3.0873	0.8399	1224	Moderate	NOEC	Phenols	days_weeks	0.441061	0.115515	0.583984	-0.799259	1.97358	0.670896
5292-45-5	5292455	Dimethyl nitroterephthalate	3	239.18	-1.60333	1.48	2.19576	2.7278	0.722	1224	Moderate	NOEC	Esters	days	-0.138027	-0.206811	0.495885	0.0797703	1.82028	1.4646
540-72-7	540727	Natriumthiocyanaat	19	81.07	-8.82681	-2.52	5.76343	4.0453	0.9269	1224	Moderate	NOEC	Neutral_Organics	days	1.27302	-1.49612	-0.655494	-1.10802	3.72854	1.05282
54593-83-8	54593838	Chlorethoxyfos	7	336	-3.09963	4.59	0	-0.7909	1.1265	1223	Moderate	NOEC	Esters	days_weeks	-1.00647	0.795623	0.257383	0.807124	0.828968	1.35277
54739-18-3	54739183	Fluvoxamin	6	318.34	-4.71897	3.09	1.34674	2.8247	0.396	1223	Moderate	NOEC	Aliphatic_Amines	weeks	-0.473822	0.312134	-0.000728985	0.674454	1.45081	0.978706
55-18-5	55185	N-Ethyl-N-nitrosoethanamine	5	102.14	-0.0655015	0.48	5.02531	4.2026	0.6814	1224	Moderate	NOEC	Aliphatic_Amines	days_weeks	0.981087	-0.529138	0.741005	-0.949733	2.38418	0.649841
55512-33-9	55512339	pyridaat	13	378.92	-9.011	5.73	0.176091	2.7728	1.0296	1224	Moderate	NOEC	Esters	days_weeks	-0.936827	1.16308	-0.684852	1.12956	0.958167	1.33407
556-67-2	556672	Octamethylcyclotetrasiloxane	14	296.62	2.19671	6.79	0.118926	0.8956	0.287	1211	Moderate	NOEC	Neutral_Organics	days_weeks	-0.959437	1.50474	1.10159	0.511284	1.53381	1.47389
556-88-7	556887	Nitroguanidine	8	104.07	-1.33988	-1.72	5.2878	4.9165	0.8729	1224	Moderate	NOEC	Aliphatic_Amines	days_weeks	1.08491	-1.23826	0.537877	-0.935234	2.47991	0.660197
56-81-5	56815	glycerol	22	92.094	-1.97317	-1.65	6	5.9368	0.3928	1224	Moderate	NOEC	Neutral_Organics	days	1.36659	-1.21569	0.436935	-1.0252	3.71197	1.28185
5742-17-6	5742176	2,4-D Isopropylamine salt	12	221.04	-4.08355	2.81	2.83059	4.863	0.6399	1224	Moderate	NOEC	Neutral_Organics	days_weeks	0.113054	0.221882	0.100553	-0.0565052	2.43423	1.20539
5742-19-8	5742198	2,4-D Diethanolamine salt	9	326.18	-13.821	-2.35	5.94032	4.099	1.1457	1211	Moderate	NOEC	Neutral_Organics	days_weeks	1.34298	-1.44132	-1.45154	0.733352	3.49941	1.51037
575-41-7	575417	1,3-Dimethylnaphthalene	3	156.23	-1.63451	4.42	0.90309	2.1132	0.7024	1224	Moderate	NOEC	Neutral_Organics	days_weeks	-0.649292	0.740828	0.490914	-0.543386	1.82009	0.937611
57646-30-7	57646307	furalaxyl	6	301.34	-6.27984	2.61	2.36173	3.5696	0.358	1224	Moderate	NOEC	Esters	days_weeks	-0.0723856	0.157417	-0.249523	0.546743	1.58377	1.27402
57960-19-7	57960197	2-(Acetyloxy)-3-dodecyl-1,4-naphthalenedione	12	386.54	-6.42022	7.44	-2.78542	2.0549	0.784	1223	Moderate	NOEC	Esters	days_weeks	-2.10814	1.71425	-0.271898	1.1868	0.0296312	1.27723
581-42-0	581420	2,6-Dimethylnaphthalene	3	156.23	-2.24565	4.31	0.30103	1.5096	0.7024	1224	Moderate	NOEC	Neutral_Organics	days_weeks	-0.887413	0.705372	0.393502	-0.543386	1.64594	0.894649
583-57-3	583573	1,2-Dimethylcyclohexane	2	112.22	1.2878	4.01	0.716003	2.2526	0.7024	1224	Moderate	NOEC	Neutral_Organics	days_weeks	-0.723287	0.608674	0.956713	-0.874008	1.72598	0.86011
586-62-9	586629	p-mentha-1,4(8)-diene	16	136.24	2.12483	4.88	1.25268	2.3693	0.6956	1224	Moderate	NOEC	Neutral_Organics	days_weeks	-0.511024	0.889098	1.09013	-0.693559	1.87745	0.98169
589-90-2	589902	1,4-Dimethylcyclohexane	2	112.22	1.35603	4.01	0.584331	2.4945	0.7024	1224	Moderate	NOEC	Neutral_Organics	days_weeks	-0.775364	0.608674	0.967587	-0.874008	1.6853	0.856019
590-66-9	590669	1,1-Dimethylcyclohexane	2	112.22	1.35603	4.05	1.03623	2.7774	0.7024	1224	Moderate	NOEC	Neutral_Organics	days_weeks	-0.596634	0.621567	0.967587	-0.874008	1.8219	0.876064
591-21-9	591219	1,3-Dimethylcyclohexane	2	112.22	1.24551	4.01	1.06707	2.8805	0.7024	1224	Moderate	NOEC	Neutral_Organics	days_weeks	-0.584436	0.608674	0.949972	-0.874008	1.83265	0.874891
59720-42-2	59720422	Azadioxabicyclooctane	6	175.19	-3.60906	-2.32	6	4.115	0.3694	1224	Moderate	NOEC	Aliphatic_Amines	days_weeks	1.36659	-1.43165	0.176183	-0.40095	2.72436	0.88759
5989-27-5	5989275	(R)-p-mentha-1,8-diene	15	136.24	2.2862	4.83	0.886868	2.6132	0.8614	1223	Moderate	NOEC	Neutral_Organics	days_weeks	-0.655708	0.872981	1.11585	-0.693559	1.7648	0.970156
5989-54-8	5989548	(S)-p-mentha-1,8-diene	21	136.24	2.2862	4.83	0.886868	2.9557	0.9088	1224	Moderate	NOEC	Neutral_Organics	days_weeks	-0.655708	0.872981	1.11585	-0.693559	1.7648	0.970156
60-00-4	60004	edetic acid	16	292.25	-9.29883	-3.86	2.39794	3.9219	0.6926	1224	Moderate	NOEC	Aliphatic_Amines	hours_days	-0.0580633	-1.92803	-0.730731	0.478455	1.85892	1.05716
603-35-0	603350	Triphenylphosphine	4	262.29	-2.86657	5.02	0.692741	4.0502	0.7491	1223	Moderate	NOEC	Neutral_Organics	days_weeks	-0.732487	0.934223	0.294532	0.253383	1.77233	1.26026
6062-26-6	6062266	4-(4-Chloro-2-methylphenoxy)butanoic acid sodium salt	8	250.66	-10.8633	-0.31	4.63397	2.477	0.6641	1211	Moderate	NOEC	Neutral_Organics	days_weeks	0.826311	-0.783775	-0.980095	0.166013	3.0665	1.24192
6164-98-3	6164983	N'-(4-Chloro-2-methylphenyl)-N,N-dimethylmethanimidamide	7	196.68	-3.0348	2.89	2.43136	3.6283	0.3039	1224	Moderate	NOEC	Aliphatic_Amines	days_weeks	-0.0448439	0.247669	0.267717	-0.239508	1.63821	0.753197
61791-63-7	61791637	N-Coco alkyltrimethylenediamines	14	410.78	-8.12668	10.61	-4.63264	2.5811	2.1453	1224	Moderate	NOEC	Aliphatic_Amines	days	-2.83873	2.73603	-0.543897	1.3689	-0.0849653	1.22434
619-24-9	619249	3-Nitrobenzonitrile	2	148.12	-3.11464	1.17	3.23401	3.7309	0.7024	1224	Moderate	NOEC	Neutral_Organics	days_weeks	0.272611	-0.306733	0.254991	-0.604312	2.54373	1.01375
619-72-7	619727	4-Nitrobenzonitrile	2	148.12	-3.44249	1.19	3.21696	3.5406	0.7024	1224	Moderate	NOEC	Neutral_Organics	days_weeks	0.265866	-0.300286	0.202733	-0.604312	2.54279	1.00364
62-23-7	62237	4-Nitrobenzoic acid	2	167.12	-3.47205	1.69	2.57711	4.294	0.7024	1224	Moderate	NOEC	Neutral_Organics	days_weeks	0.0128012	-0.139123	0.198022	-0.461575	2.34975	1.03456
630-20-6	630206	1,1,1,2-Tetrachloroethane	2	167.85	1.07918	2.93	3.02938	3.3406	0.7024	1224	Moderate	NOEC	Neutral_Organics	weeks	0.191679	0.260562	0.92346	-0.456091	2.5468	1.06398
634-90-2	634902	1,2,3,5-Tetrachlorobenzene	6	215.89	-1.09151	4.56	0.70757	2.497	0.4988	1224	Moderate	NOEC	Neutral_Organics	weeks	-0.726622	0.785953	0.577464	-0.0951942	1.87283	1.04756
64-18-6	64186	Formic acid	10	46.025	3.67992	-0.46	6.33041	4.754	0.5938	1224	Moderate	NOEC	Neutral_Organics	days	1.49727	-0.832124	1.338	-1.37129	3.73921	1.27673
6484-52-2	6484522	Nitric acid ammonium salt	12	80.04	-14.4737	-4.39	6	3.8911	0.7346	1224	Moderate	NOEC	Inorganic_Compound	days_weeks	1.36659	-2.09887	-1.55557	-1.11576	4.5429	0.705198
65-30-5	65305	Nicotine sulfate	10	422.55	-10.7077	0.4	4.01284	3.1143	0.3698	1224	Moderate	NOEC	Aliphatic_Amines	weeks_months	0.580645	-0.554924	-0.955303	1.45732	1.822	1.37077
65195-55-3	65195553	5-O-Demethyl-antibiotic C 067A1a	15	875.12	-29.8356	4.48	-3.45544	-0.0492	1.3578	1224	Moderate	NOEC	Esters	weeks_months	-2.37313	0.760167	-4.00417	4.85723	-0.264879	2.28735
66423-09-4	66423094	N-Methylmethanamine (2R)-2-(4-chloro-2-methylphenoxy)propanoate	6	259.74	-8.57025	1.16	3.33203	3.9832	1.017	1223	Moderate	NOEC	Neutral_Organics	days_weeks	0.311381	-0.309956	-0.614599	0.234226	2.64347	1.26033
66455-14-9	66455149	C12-13 Alcohols, Ethoxylated	23	214.39	-1.60555	5.96	-0.523603	2.9591	0.4443	1211	Moderate	NOEC	Neutral_Organics	days	-1.21356	1.23721	0.495531	-0.106463	1.73522	1.33323
67564-91-4	67564914	fenpropimorf	16	303.49	-4.58004	4.93	0.633468	2.2808	0.7115	1224	Moderate	NOEC	Aliphatic_Amines	weeks	-0.75593	0.905214	0.0214144	0.562895	1.23341	0.875258
68783-78-8	68783788	Dimethylditallowalkyl quaternary ammonium compounds, Chlorides	10	568.46	-16.4449	11.59	-7.48945	1.6648	0.9274	1224	Moderate	NOEC	Neutral_Organics	days_weeks	-3.96863	3.05191	-1.86977	2.55346	-0.526581	1.51014
6980-18-3	6980183	Kasugamycin	7	379.37	-10.011	-5.75	5.09691	3.0863	1.3578	1224	Moderate	NOEC	Aliphatic_Amines	hours_days	1.00941	-2.53723	-0.844246	1.13294	2.68395	1.49022
700-38-9	700389	5-Methyl-2-nitrophenol	4	153.14	-1.69897	2.31	2.43457	3.5567	0.8399	1224	Moderate	NOEC	Phenols	days_weeks	-0.0435762	0.0607193	0.48064	-0.566599	1.6115	0.708445
7003-89-6	7003896	Chlormequat	7	122.62	-4.88941	-3.44	6	4.1213	0.6299	1224	Moderate	NOEC	Neutral_Organics	days_weeks	1.36659	-1.79266	-0.0278967	-0.795879	3.40267	1.05688
7085-19-0	7085190	MCPP Acid	15	214.65	-5.52288	3.2	2.9345	4.0343	0.7641	1224	Moderate	NOEC	Neutral_Organics	days	0.154151	0.34759	-0.128868	-0.10451	2.83092	1.41648
71-63-6	71636	Digitoxin	3	764.96	-26.9626	1.85	0.591065	3.1326	1.0385	1224	Moderate	NOEC	Esters	weeks	-0.772701	-0.0875508	-3.54622	4.02966	1.43313	2.15816
71626-11-4	71626114	Benalaxyl	16	325.41	-5	3.4	1.5682	2.6499	0.4994	1223	Moderate	NOEC	Esters	days_weeks	-0.386233	0.412055	-0.045524	0.727567	1.32744	1.34859
72956-09-3	72956093	Carvedilol	3	406.48	-13.2291	4.19	-0.234406	1.7016	1.0385	1223	Moderate	NOEC	Aliphatic_Amines	days_weeks	-1.09918	0.666693	-1.3572	1.3366	0.963379	1.07265
731-27-1	731271	tolylfluanid	7	347.26	-5.82391	3.9	-0.0457575	1.4033	0.6545	1224	Moderate	NOEC	Neutral_Organics	weeks	-1.02457	0.573218	-0.17685	0.891714	1.70592	1.35308
7398-69-8	7398698	Dimethyldiallylammonium chloride	13	161.68	-5.45223	-2.49	6	3.3132	0.7494	1224	Moderate	NOEC	Neutral_Organics	days_weeks	1.36659	-1.48645	-0.117606	-0.502443	3.4099	1.16726
74-83-9	74839	Bromomethane	18	94.945	5.32623	1.18	4.09377	2.4528	0.5516	1224	Moderate	NOEC	Neutral_Organics	days_weeks	0.612655	-0.303509	1.60041	-1.00379	2.69515	1.09944
74-88-4	74884	Iodomethane	8	141.94	4.73121	1.59	4.09861	2.1823	0.3621	1223	Moderate	NOEC	Neutral_Organics	days_weeks	0.614569	-0.171356	1.50557	-0.650738	2.70426	1.24373
74-96-4	74964	bromoethane	6	108.97	4.79508	1.67	3.82657	4.3057	0.7491	1224	Moderate	NOEC	Neutral_Organics	days_weeks	0.506976	-0.14557	1.51575	-0.898423	2.62121	1.11598
74115-24-5	74115245	Clofentezine	16	303.15	-9.011	3.1	0	1.4715	1.8084	1224	Moderate	NOEC	Neutral_Organics	weeks	-1.00647	0.315357	-0.684852	0.56034	1.76071	1.12113
7440-42-8	7440428	Boron	137	13.84	-6.90658	0.23	4.64068	4.1464	0.4524	1221	Moderate	NOEC	Neutral_Organics	days	0.828963	-0.609719	-0.349421	-1.61308	3.36446	0.784435
7447-41-8	7447418	Lithium chloride	9	42.39	-15.7825	-0.46	5.50826	3.7887	0.5598	1224	Moderate	NOEC	Inorganic_Compound	days	1.1721	-0.832124	-1.76419	-1.3986	4.75785	0.739283
75-64-9	75649	tert-Butylamine	8	73.14	4.67628	0.72	5.75435	3.759	0.5317	1224	Moderate	NOEC	Aliphatic_Amines	days_weeks	1.26943	-0.451779	1.49682	-1.16759	2.54363	0.709362
7553-56-2	7553562	Iodine	9	253.81	-0.632644	2.49	2.51851	2.5072	1.0807	1223	Moderate	NOEC	Inorganic_Compound	days_weeks	-0.0103751	0.118738	0.650606	0.189677	3.3126	1.45888
76-22-2	76222	Camphor	8	152.24	0.154214	3.04	3.01098	3.7491	0.9219	1224	Moderate	NOEC	Neutral_Organics	days_weeks	0.184399	0.296017	0.776026	-0.57336	2.4343	1.08587
7601-89-0	7601890	Sodium perchlorate	49	122.44	-18.0386	-7.18	6.32222	4.2183	1.4416	1211	Moderate	NOEC	Inorganic_Compound	days_weeks	1.49403	-2.99816	-2.12379	-0.797231	4.68612	0.804577
7631-86-9	7631869	Silica	74	60.08	-7.27084	0.53	4.6852	4.5528	1.1288	1223	Moderate	NOEC	Neutral_Organics	days	0.846573	-0.513021	-0.407481	-1.26571	3.3826	0.935617
7631-89-2	7631892	Arsenic acid, Sodium salt	4	185.91	-19.9626	-7.29	5.42651	3.3626	0.862	1224	Moderate	NOEC	Neutral_Organics	days_weeks	1.13977	-3.03361	-2.43047	-0.320417	3.42302	0.88296
76578-12-6	76578126	Quizalofop	2	344.76	-9.36754	3.57	-0.522879	4.1822	0.8363	1222	Moderate	NOEC	Neutral_Organics	days_weeks	-1.21328	0.46685	-0.741683	0.872933	1.48841	1.33308
7664-38-2	7664382	Phosphoric acid	33	98	-10.2154	-0.77	5.73127	4.0342	0.3789	1223	Moderate	NOEC	Inorganic_Compound	days_weeks	1.2603	-0.932046	-0.876824	-0.980835	4.40694	0.830003
7664-93-9	7664939	Sulfuric acid	8	98.07	-4.22695	-2.2	6	3.9129	0.4133	1224	Moderate	NOEC	Inorganic_Compound	days_weeks	1.36659	-1.39297	0.0776962	-0.980309	4.41122	1.0261
7704-34-9	7704349	Sulfur	13	34.08	-8.41908	-1.38	6	4.826	0.5576	1224	Moderate	NOEC	Inorganic_Compound	days	1.36659	-1.12866	-0.590503	-1.46103	4.81187	0.947867
7747-35-5	7747355	7a-Ethyldihydro-1H,3H,5H-oxazolo[3,4-c]oxazole	11	143.19	1.99347	0.4	5.45332	3.8132	0.8448	1223	Moderate	NOEC	Aliphatic_Amines	weeks	1.15037	-0.554924	1.06919	-0.641348	2.60593	0.767292
7757-79-1	7757791	Potassium nitrate	22	101.1	-16.9788	-0.79	5.74028	4.8372	0.4787	1224	Moderate	NOEC	Inorganic_Compound	days	1.26387	-0.938492	-1.95487	-0.957546	4.84336	0.927574
7757-83-7	7757837	Sodium sulfite	17	126.04	-18.3546	-7.78	6	5.0466	0.6644	1224	Moderate	NOEC	Inorganic_Compound	days_weeks	1.36659	-3.19155	-2.17416	-0.770186	4.59277	0.801211
7758-19-2	7758192	Chlorous acid, Sodium salt (1:1)	15	90.44	-16.0137	-7.18	6	3.1401	1.4815	1223	Moderate	NOEC	Inorganic_Compound	days_weeks	1.36659	-2.99816	-1.80104	-1.03763	4.56269	0.733337
7778-80-5	7778805	Potassium sulfate	11	174.25	-18.757	-4.38	6	4.936	0.3944	1224	Moderate	NOEC	Inorganic_Compound	days_weeks	1.36659	-2.09564	-2.2383	-0.408012	4.59795	0.918247
78-51-3	78513	tris(2-butoxyethyl) phosphate	13	398.48	-3.78526	3	0.38819	3.6376	0.2757	1223	Moderate	NOEC	Esters	hours_days	-0.85294	0.283124	0.148097	1.2765	1.10544	1.65075
78-79-5	78795	Isoprene	7	68.119	4.86598	2.58	2.74181	3.565	0.6472	1224	Moderate	NOEC	Neutral_Organics	days_weeks	0.077942	0.147747	1.52705	-1.20531	2.29238	0.913547
78-92-2	78922	2-Butanol	20	74.123	3.4387	0.77	4.93015	5.393	0.2607	1224	Moderate	NOEC	Neutral_Organics	days	0.943453	-0.435663	1.29955	-1.16021	3.31902	1.29034
78-93-3	78933	butanone	27	72.107	4.11827	0.26	5.29447	5.3528	0.3955	1224	Moderate	NOEC	Neutral_Organics	days_weeks	1.08754	-0.60005	1.40787	-1.17535	3.07364	1.05131
78-96-6	78966	1-Amino-2-propanol	8	75.112	2.01019	-1.19	6	4.4398	0.6422	1224	Moderate	NOEC	Aliphatic_Amines	days	1.36659	-1.06742	1.07186	-1.15278	2.99893	0.950532
78-99-9	78999	1,1-Dichloropropane	2	112.99	1.70586	2.25	3.43136	3.6765	0.7024	1224	Moderate	NOEC	Neutral_Organics	days_weeks	0.350666	0.0413797	1.02335	-0.868223	2.54144	1.01939
79-09-4	79094	Propionic acid	20	74.079	2.90587	0.58	5.54283	3.9729	0.3741	1224	Moderate	NOEC	Neutral_Organics	days	1.18577	-0.496905	1.21462	-1.16054	3.51107	1.30558
79-10-7	79107	Acrylic acid	30	72.063	2.90443	0.44	5.17898	3.2216	0.6814	1223	Moderate	NOEC	Neutral_Organics	days	1.04187	-0.542031	1.21439	-1.17568	3.4011	1.28362
79-33-4	79334	l-(+)-lactic acid	7	90.078	0.581196	-0.65	5.88762	4.8193	0.5243	1223	Moderate	NOEC	Neutral_Organics	days	1.32214	-0.893366	0.844084	-1.04035	3.64518	1.32823
79-92-5	79925	Camphene	21	136.24	2.37525	4.35	1.2467	3.1558	1.0098	1224	Moderate	NOEC	Neutral_Organics	days_weeks	-0.513392	0.718265	1.13005	-0.693559	1.87243	0.994862
79241-46-6	79241466	Fluazifop-p-butyl	14	383.37	-6.60555	4.5	0.30103	2.2738	1.1752	1224	Moderate	NOEC	Esters	days_weeks	-0.887413	0.766614	-0.301438	1.16299	0.965022	1.43723
80-33-1	80331	Chlorfenson	6	303.16	-5.72584	4.21	0.471438	3.301	0	1211	Moderate	NOEC	Esters	weeks	-0.820014	0.673139	-0.161219	0.560416	1.12406	1.08554
8002-13-9	8002139	Rapeseed oil	6	447.02	-7.10403	7.09	-2.86423	2.9417	0.2411	1224	Moderate	NOEC	Esters	days	-2.13931	1.60144	-0.380893	1.64115	0.361375	1.74569
8004-87-3	8004873	C.I. Basic Violet 1	7	393.96	-12.0655	0.43	4.51851	3.8592	1.4686	1224	Moderate	NOEC	Neutral_Organics	weeks	0.780645	-0.545254	-1.17172	1.24254	3.16588	1.59447
81-81-2	81812	warfarin	23	308.33	-8.82595	2.23	1.60186	3.4507	1.1898	1224	Moderate	NOEC	Esters	days_weeks	-0.372919	0.0349332	-0.655357	0.599255	1.38679	1.19816
82-66-6	82666	2-(Diphenylacetyl)-1H-indene-1,3(2H)-dione	15	340.38	-9.98716	4.27	-0.522879	3.2628	0.8101	1224	Moderate	NOEC	Neutral_Organics	weeks	-1.21328	0.692479	-0.840447	0.840028	1.6152	1.18714
83-41-0	83410	1,2-Dimethyl-3-nitrobenzene	2	151.17	-0.444906	2.83	2.06819	2.7113	0.7024	1224	Moderate	NOEC	Neutral_Organics	days_weeks	-0.188484	0.228329	0.68053	-0.581399	2.157	1.02522
83-89-6	83896	Quinacrine	7	399.97	-9.75696	5.75	-1.5293	3.8421	0.875	1224	Moderate	NOEC	Aliphatic_Amines	weeks	-1.61133	1.16952	-0.803754	1.28769	0.646149	0.963305
86-57-7	86577	1-Nitronaphthalene	3	173.17	-3.31876	3.19	0.962843	2.9736	0.7024	1224	Moderate	NOEC	Neutral_Organics	days_weeks	-0.625659	0.344366	0.222456	-0.416125	1.85979	0.968384
89-60-1	89601	1-Chloro-4-methyl-2-nitrobenzene	2	171.58	-1.82102	3	1.82724	3.0141	0.7024	1224	Moderate	NOEC	Neutral_Organics	days_weeks	-0.283781	0.283124	0.461185	-0.42807	2.10185	1.04593
90-15-3	90153	1-Naphthol	13	144.17	-3.56225	2.85	2.93752	2.5227	0.3841	1224	Moderate	NOEC	Phenols	days_weeks	0.155345	0.234775	0.183645	-0.633986	1.78748	0.641389
90717-03-6	90717036	quinmerac	6	221.64	-6.86328	0.78	2.3483	3.9847	0.1812	1224	Moderate	NOEC	Neutral_Organics	days_weeks	-0.0776946	-0.43244	-0.342519	-0.0519977	2.32416	1.13338
91-64-5	91645	coumarin	16	146.15	-1.0576	1.51	3.14913	2.9211	0.747	1224	Moderate	NOEC	Esters	days	0.239039	-0.197142	0.58287	-0.619111	2.10146	1.19487
93-08-3	93083	2'-acetonaphthone	11	170.21	-3.21396	2.85	2.43457	2.8786	0.4795	1224	Moderate	NOEC	Neutral_Organics	days_weeks	-0.0435762	0.234775	0.23916	-0.438362	2.30334	1.03191
93-72-1	93721	2-(2,4,5-Trichlorophenoxy)propanoic acid	12	269.51	-5.58838	3.8	2.30103	2.8766	0.7641	1224	Moderate	NOEC	Neutral_Organics	days_weeks	-0.0963922	0.540985	-0.139308	0.307622	2.29348	1.29825
94-11-1	94111	2-(2,4-Dichlorophenoxy)acetic acid, 1-Methylethyl ester	5	263.12	-3.63451	3.81	1.57171	2.1069	0.8392	1223	Moderate	NOEC	Esters	days_weeks	-0.384846	0.544209	0.172126	0.259618	1.31096	1.1621
94-82-6	94826	2,4-DB	12	249.09	-4.19586	3.53	1.66276	3.2004	0.3467	1224	Moderate	NOEC	Neutral_Organics	days_weeks	-0.348835	0.453957	0.0826509	0.154218	2.08264	1.23922
95-16-9	95169	Benzothiazole	16	135.19	0.995234	2.17	3.04922	3.8631	0.3479	1223	Moderate	NOEC	Neutral_Organics	days_weeks	0.199524	0.0155936	0.910079	-0.701447	2.43505	1.06152
95-56-7	95567	2-Bromophenol	3	173.01	-0.595166	2.35	3.34772	3.1562	0.8399	1224	Moderate	NOEC	Phenols	days_weeks	0.317584	0.0736123	0.656579	-0.417327	1.87335	0.850085
95-87-4	95874	2,5-xylenol	2	122.17	-0.806875	2.33	3.549	2.9065	0.8399	1224	Moderate	NOEC	Phenols	days_weeks	0.397194	0.0671658	0.622834	-0.799259	1.93692	0.674455
95-93-2	95932	1,2,4,5-Tetramethylbenzene	2	134.22	-0.277366	4	0.541579	2.5106	0.7024	1224	Moderate	NOEC	Neutral_Organics	days_weeks	-0.792273	0.605451	0.707235	-0.708734	1.69336	0.886417
950-35-6	950356	Methyl paraoxon	2	247.15	-4.48149	1.33	2.86392	1.5183	1.0128	1224	Moderate	NOEC	Esters	days	0.126235	-0.25516	0.037124	0.139644	2.05925	1.44505
953-17-3	953173	Methyl trithion	9	314.8	-4.57349	4.82	0.20412	1.323	1.0433	1224	Moderate	NOEC	Esters	days_weeks	-0.925742	0.869758	0.0224593	0.64786	0.909613	1.24364
95465-99-9	95465999	Cadusafos	11	270.39	-3.04576	3.9	2.39445	1.6629	1.1265	1224	Moderate	NOEC	Esters	days	-0.059443	0.573218	0.26597	0.314233	1.89888	1.51392
96182-53-5	96182535	Phostebupirim	6	318.37	-4.42597	4.19	0.740363	0.6715	1.5862	1223	Moderate	NOEC	Esters	days_weeks	-0.713652	0.666693	0.0459731	0.67468	1.06982	1.2924
99-51-4	99514	4-nitro-o-xylene	2	151.17	-2.44491	2.91	1.99983	3.0768	0.7024	1224	Moderate	NOEC	Neutral_Organics	days_weeks	-0.215521	0.254115	0.361742	-0.581399	2.16204	0.965655
99-71-8	99718	4-(1-Methylpropyl)phenol	2	150.22	-1.42946	3.08	2.98227	2.0623	0.8399	1224	Moderate	NOEC	Phenols	days_weeks	0.173046	0.308911	0.523599	-0.588536	1.7736	0.72108
99-96-7	99967	4-Hydroxybenzoic acid	18	138.12	-3.02821	1.39	4.07408	3.9638	0.5225	1224	Moderate	NOEC	Phenols	days_weeks	0.604869	-0.235821	0.268766	-0.679436	2.12419	0.704433
999-97-3	999973	Hexamethyldisilazane	16	161.4	3.22174	2.62	1.47355	4.1931	0.7491	1223	Moderate	NOEC	Neutral_Organics	days_weeks	-0.423671	0.16064	1.26497	-0.504547	1.93012	1.13852
10043-35-3	10043353	Boric acid (H3BO3)	153	61.83	-16.1331	0.17	4.69897	3.7469	0.6828	1111	High	NOEC	Neutral_Organics	days	1.02887	-0.814956	-1.88873	-1.91885	3.50065	0.701009
1071-83-6	1071836	Glyphosate	61	169.07	-7.80134	-5.4	6.02119	3.457	0.9252	1111	High	NOEC	Aliphatic_Amines	days	1.51587	-2.60285	-0.171408	-0.970715	3.13142	1.06206
108-95-2	108952	Phenol	50	94.113	1.63403	1.51	4.54915	3.2142	0.9683	1111	High	NOEC	Phenols	days	0.973688	-0.384836	1.77338	-1.63343	2.55467	0.972385
121-75-5	121755	Malathion	96	330.36	-5.47108	2.36	2.15534	1.6613	1.4521	1111	High	NOEC	Esters	hours_days	0.0920016	-0.111998	0.308897	0.455294	1.6613	1.4521
12125-02-9	12125029	Ammonium chloride ((NH4)Cl)	83	53.49	-11.6253	-4.37	5.57054	3.537	0.7609	1111	High	NOEC	Inorganic_Compound	days	1.34989	-2.27223	-0.959578	-1.99259	4.72325	0.944477
122-14-5	122145	Fenitrothion	25	277.24	-4.26761	3.3	1.57978	1.8764	0.9716	1111	High	NOEC	Esters	days_weeks	-0.119985	0.189728	0.556954	-0.0143546	1.32153	1.20092
123343-16-8	123343168	Pyrithiobac-sodium	17	348.74	-10.4437	0.6	5.86213	3.2338	2.3078	1111	High	NOEC	Neutral_Organics	days_weeks	1.45728	-0.676932	-0.716041	0.617796	3.43237	1.64383
124495-18-7	124495187	5,7-Dichloro-4-(4-fluorophenoxy)quinoline	20	308.14	-6.82391	4.66	-0.935542	1.8196	1.0551	1111	High	NOEC	Neutral_Organics	weeks	-1.04643	0.626269	0.0300578	0.258841	1.4498	1.13774
131-52-2	131522	Pentachlorophenol, Sodium salt	20	288.32	-10.5686	2.05	5.51851	1.8528	0.9641	1111	High	NOEC	Phenols	weeks_months	1.33072	-0.211503	-0.741792	0.0836066	2.26485	1.01419
131860-33-8	131860338	Azoxystrobin	30	403.4	-12.0835	2.5	0.778151	1.8784	0.975	1111	High	NOEC	Esters	days_weeks	-0.415241	-0.0670599	-1.05404	1.10106	1.17965	1.40207
151-21-3	151213	Dodecyl sulfate	37	288.38	-11.7447	1.6	5	2.9421	0.521	1111	High	NOEC	Neutral_Organics	days_weeks	1.13974	-0.355947	-0.984204	0.0841371	3.18848	1.3436
15307-86-5	15307865	Diclofenac	49	296.15	-5.087	4.02	1.2141	1.9314	1.5048	1111	High	NOEC	Neutral_Organics	days_weeks	-0.254673	0.420838	0.388063	0.152834	1.95847	1.35394
15687-27-1	15687271	Ibuprofen	51	206.29	-1.60566	3.79	1.43949	2.3803	1.8354	1111	High	NOEC	Neutral_Organics	days	-0.171658	0.347011	1.10563	-0.641643	2.32865	1.4205
1689-99-2	1689992	Bromoxynil octanoate	18	403.12	-5.31876	5.4	-1.09691	1.5684	0.7815	1111	High	NOEC	Esters	days_weeks	-1.10586	0.863798	0.340294	1.09858	0.525899	1.46795
1763-23-1	1763231	perfluoroctaansulfonaat (PFOS)	22	500.13	-2.19382	4.49	-0.983384	2.1626	1.2999	1111	High	NOEC	Neutral_Organics	months	-1.06405	0.571701	0.984396	1.95628	2.1626	1.2999
1897-45-6	1897456	chloorthalonil	48	265.92	-6.24413	3.05	-0.091515	0.9041	1.4237	1111	High	NOEC	Neutral_Organics	weeks_months	-0.735556	0.109482	0.149561	-0.114438	1.18578	1.09996
2008-39-1	2008391	(2,4-Dichlorophenoxy)acetic acid, compd. with N-methylmethanamine (1:1)	18	266.13	-9	0.65	5.87506	4.1253	1.0352	1111	High	NOEC	Neutral_Organics	weeks	1.46205	-0.660883	-0.418471	-0.112581	3.53655	1.288
2921-88-2	2921882	Chlorpyrifos	279	350.59	-4.6925	4.96	0.049218	0.3554	1.4608	1111	High	NOEC	Esters	days_weeks	-0.683721	0.722564	0.469376	0.634152	0.864317	1.3577
298-00-0	298000	Parathion-Methyl	31	263.21	-5.45593	2.86	1.57634	2.0554	1.464	1111	High	NOEC	Esters	days	-0.121253	0.0484948	0.31202	-0.138398	1.68254	1.39735
333-41-5	333415	Diazinon	79	304.35	-4.04528	3.81	1.60206	0.8007	1.7687	1111	High	NOEC	Esters	days_weeks	-0.11178	0.353431	0.60278	0.225332	1.32541	1.29737
38641-94-0	38641940	N-(Phosphonomethyl)glycine compd. with 2-propanamine (1:1)	79	169.07	-7.80134	-5.4	6.02119	3.4289	1.0878	1111	High	NOEC	Aliphatic_Amines	days	1.51587	-2.60285	-0.171408	-0.970715	3.13142	1.06206
41198-08-7	41198087	Phosphorothioic acid O-(4-bromo-2-chlorophenyl) O-ethyl S-propyl ester	21	373.64	-2.99379	4.82	-0.389787	1.1087	1.6621	1111	High	NOEC	Esters	days_weeks	-0.845415	0.677626	0.81951	0.837944	0.709778	1.4678
50-28-2	50282	estradiol	110	272.39	-6.57632	3.94	0.944882	-0.26	1.2894	1111	High	NOEC	Phenols	days_weeks	-0.353831	0.395159	0.0810906	-0.0572348	1.22386	0.905694
51630-58-1	51630581	Fenvalerate	28	419.91	-8.82391	6.22	-2.69897	1.6138	1.8276	1111	High	NOEC	Esters	days_weeks	-1.69593	1.12701	-0.382175	1.24703	0.0866548	1.34704
52315-07-8	52315078	Cypermethrin | Zeta-cypermethrin	50	416.31	-2.88606	6.94	-0.939302	0.0017	1.7547	1111	High	NOEC	Esters	weeks	-1.04781	1.35812	0.841714	1.2152	0.661106	1.46545
52918-63-5	52918635	Deltamethrin	44	505.22	-7.82391	6.2	-2.69897	-0.5741	1.7066	1111	High	NOEC	Esters	days_weeks	-1.69593	1.12059	-0.176059	2.00128	0.0738036	1.67564
55-38-9	55389	Fenthion	29	278.33	-4.97881	4.09	0.875061	1.5478	1.8136	1111	High	NOEC	Esters	days	-0.379548	0.443307	0.410363	-0.00471765	1.46442	1.41691
56-38-2	56382	Parathion-ethyl	26	291.26	-5.17522	3.83	1.04139	-0.2971	1.2686	1111	High	NOEC	Esters	days	-0.318285	0.359851	0.369879	0.1096	1.51723	1.46777
56296-78-7	56296787	N-Methyl-gamma-[4-(trifluoromethyl)phenoxy]benzenepropanamine, Hydrochloride (1:1)	72	309.33	-4.5986	3.82	1.78017	0.8384	1.1769	1111	High	NOEC	Aliphatic_Amines	days_weeks	-0.0461779	0.356641	0.488731	0.269362	1.46146	1.06578
58-89-9	58899	Lindane	30	290.83	-4.45346	4.14	0.90309	1.676	1.2786	1111	High	NOEC	Neutral_Organics	weeks	-0.369224	0.459356	0.518647	0.105798	1.97514	1.23242
66230-04-4	66230044	Esfenvalerate	82	419.91	-8.82391	6.22	-2.69897	-0.4365	0.8562	1111	High	NOEC	Esters	days_weeks	-1.69593	1.12701	-0.382175	1.24703	0.0866548	1.34704
7647-14-5	7647145	Sodium chloride (NaCl)	111	58.44	-22.8069	-0.46	5.55267	6.0478	0.7866	1111	High	NOEC	Inorganic_Compound	days	1.3433	-1.01718	-3.2643	-1.94882	4.86155	0.603023
7778-39-4	7778394	Arsenic acid (H3AsO4)	34	141.94	-18.2403	-3.14	5.77085	2.309	1.0274	1111	High	NOEC	Neutral_Organics	days_weeks	1.42366	-1.87742	-2.32306	-1.21058	3.50498	0.740555
80-05-7	80057	Bisphenol-A	72	228.29	-4.51914	3.64	2.56562	2.23	0.8288	1111	High	NOEC	Phenols	days_weeks	0.243118	0.298863	0.505108	-0.447135	1.68736	0.884684
85535-84-8	85535848	C10-C13 Chlooralkanen	20	176.73	-0.364516	5.43	0.11694	1.6905	0.7249	1111	High	NOEC	Neutral_Organics	days	-0.658778	0.873427	1.36145	-0.90299	1.9129	1.27056
87-86-5	87865	Pentachlorphenol	28	266.34	-3.95861	5.12	1.14613	1.5519	0.6101	1111	High	NOEC	Phenols	weeks_months	-0.279709	0.773922	0.620644	-0.110724	0.858168	0.883746
94-75-7	94757	2,4-D	40	221.04	-4.08355	2.81	2.83059	3.649	1.0408	1111	High	NOEC	Neutral_Organics	days_weeks	0.34071	0.0324456	0.594892	-0.511234	2.43423	1.20539
